# Supplementary material for: Ru-catalyzed activation of free phenols in a one-step Suzuki–Miyaura cross-coupling under mechanochemical conditions
Source: Royal Society of Chemistry journal article supplement (doi:10.1039/d4sc01704h), 2024-01-01
Supplement: d4sc01704h1.pdf [file d4sc01704h1.pdf]

# Ru-catalyzed activation of free phenols in a one-step Suzuki-Miyaura cross-coupling under mechanochemical conditions.

Satenik Mkrtchyan<sup>a,b</sup>, Michał Jakubczyk<sup>c,d</sup>, Sehrish Sarfaraz<sup>e</sup>, Khurshid Ayub<sup>e</sup>, Viktor O. Iaroshenko<sup>a,b,f,g,h\*</sup>

<sup>a</sup>Department of Chemistry, Faculty of Natural Sciences, Matej Bel University, Tajovského 40, 97401, Banská Bystrica, Slovakia.

<sup>b</sup>University Centre for Research & Development, Chandigarh University, Mohali, Punjab, 140413, India.

<sup>c</sup>Institute of Inorganic Chemistry, Czech Academy of Sciences, Husinec-Řež č.p. 1001, 250 68 Husinec-Řež, Czech Republic.

<sup>d</sup>Laboratory of Molecular Assays and Imaging, Institute of Bioorganic Chemistry, Polish Academy of Sciences, Noskowskiego 12/14, 61-704, Poznań, Poland.

<sup>e</sup>Department of Chemistry, COMSATS University, Abbottabad Campus, Abbottabad, KPK, 22060, Pakistan.

<sup>f</sup>Division of Wood Chemistry and Pulp Technology, Department of Fiber and Polymer Technology, School of Chemistry, Biotechnology and Health, KTH Royal Institute of Technology, Teknikringen 56-58, SE-100 44 Stockholm, Sweden.

<sup>g</sup>Functional Materials Group, Gulf University for Science and Technology, Mubarak Al-Abdullah 32093, Kuwait.

<sup>h</sup>Centre of Research Impact and Outcome, Chitkara University Institute of Engineering and Technology, Chitkara University, Rajpura-140401, Punjab, India.

\*Corresponding author, Email: [iva108@gmail.com](mailto:iva108@gmail.com), [iaroshenko.V@gust.edu.kw](mailto:iaroshenko.V@gust.edu.kw), [viktor.iaroshenko@umb.sk](mailto:viktor.iaroshenko@umb.sk)

## Table of Contents

|                                                                  |      |
|------------------------------------------------------------------|------|
| (A) Experimental Section.....                                    | S2   |
| I. Scope of starting materials used.....                         | S3   |
| II. Reaction conditions screening.....                           | S5   |
| III. Reaction procedures with optimised reaction conditions..... | S7   |
| (B) Characterization of products.....                            | S9   |
| (C) Copies <sup>1</sup> H and <sup>13</sup> C NMR spectra.....   | S36  |
| (D) DFT Study.....                                               | S107 |

### (A) Experimental Section.

Commercially available starting materials, reagents, catalysts, anhydrous and degassed solvents were used without further purification. Flash column chromatography was performed with Merck Silica gel 60 (230-400 mesh). The solvents for column chromatography were distilled before the use. Thin layer chromatography was carried out using Merck TLC Silica gel 60 F<sub>254</sub> and visualized by short-wavelength ultraviolet light or by treatment with potassium permanganate (KMnO<sub>4</sub>) stain. <sup>1</sup>H, <sup>13</sup>C and <sup>19</sup>F NMR spectra were recorded on a Bruker 400 and 500 MHz at 20°C. All <sup>1</sup>H NMR spectra are reported in parts per million (ppm) downfield of TMS and were measured relative to the signals for CHCl<sub>3</sub> (7.26 ppm) and DMSO (2.50 ppm). All <sup>13</sup>C{<sup>1</sup>H} NMR spectra were reported in ppm relative to residual CHCl<sub>3</sub> (77.00 ppm) or DMSO (39.70 ppm) and were obtained with <sup>1</sup>H decoupling. Coupling constants, *J*, are reported in Hertz (Hz). Gas chromatographic analyses was performed on Gas Chromatograph Mass Spectrometer GCMS-QP2010 Ultra instrument. Mechanochemical synthesis was performed using the Retsch MM400 mill using the standard kit. Liquid chemicals were dosed using gas tight micro syringes. Isolation of obtained compounds was achieved by column chromatography on Silica gel. All commercially available compounds were purchased from appropriate vendors.

#### A-1. Scope of the starting materials used.

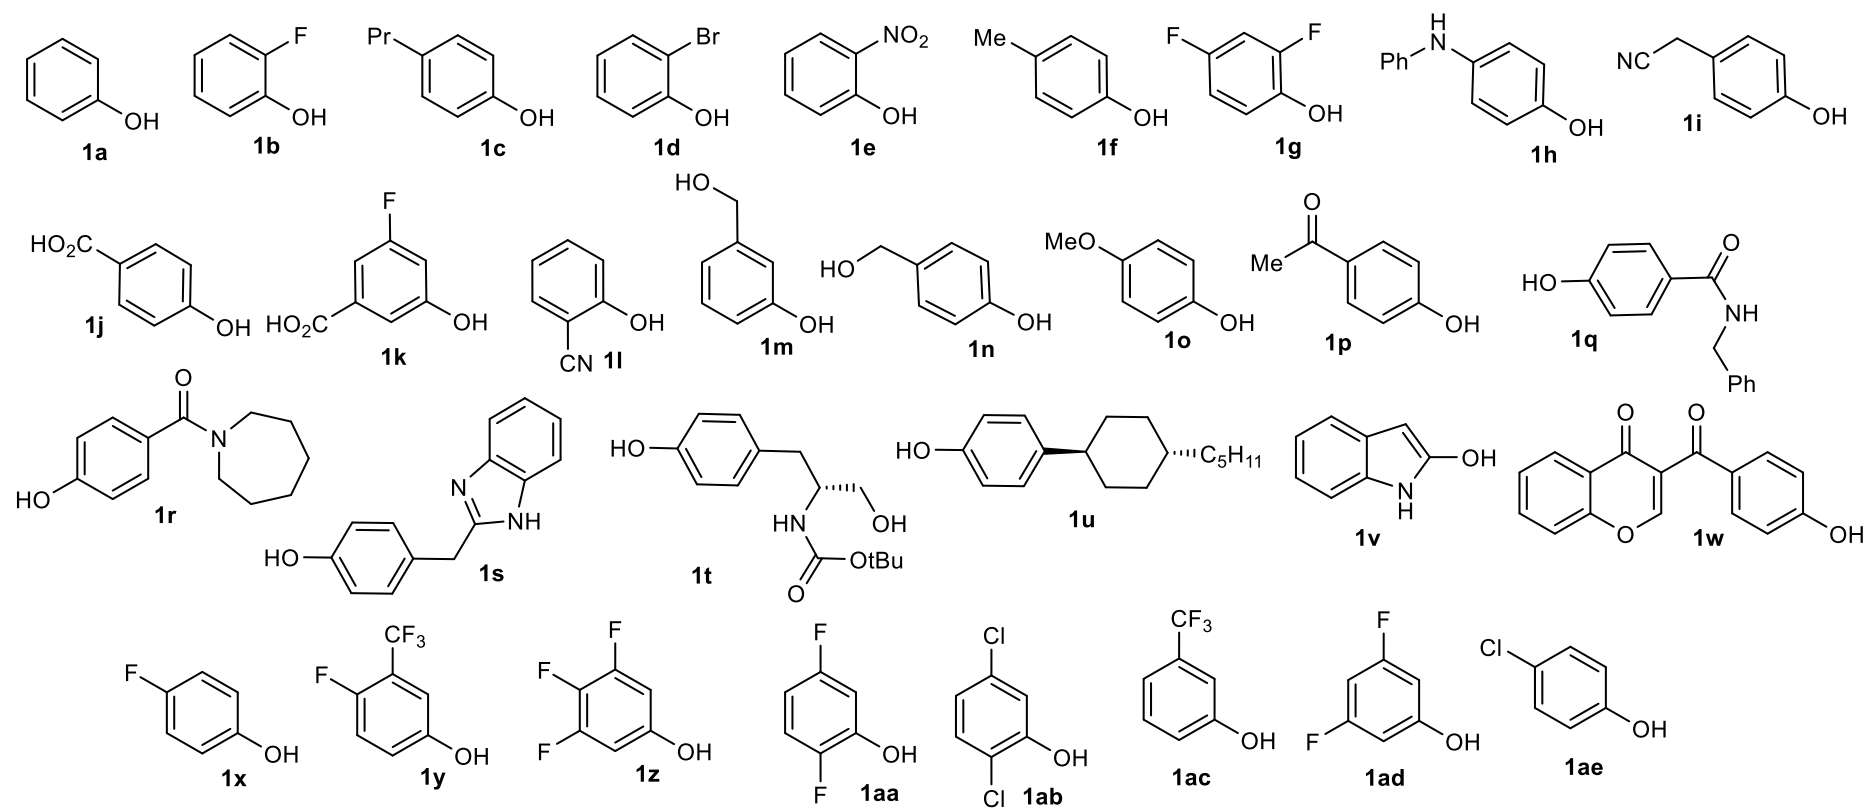

**Scheme 1.** Scope of phenols **1** used.

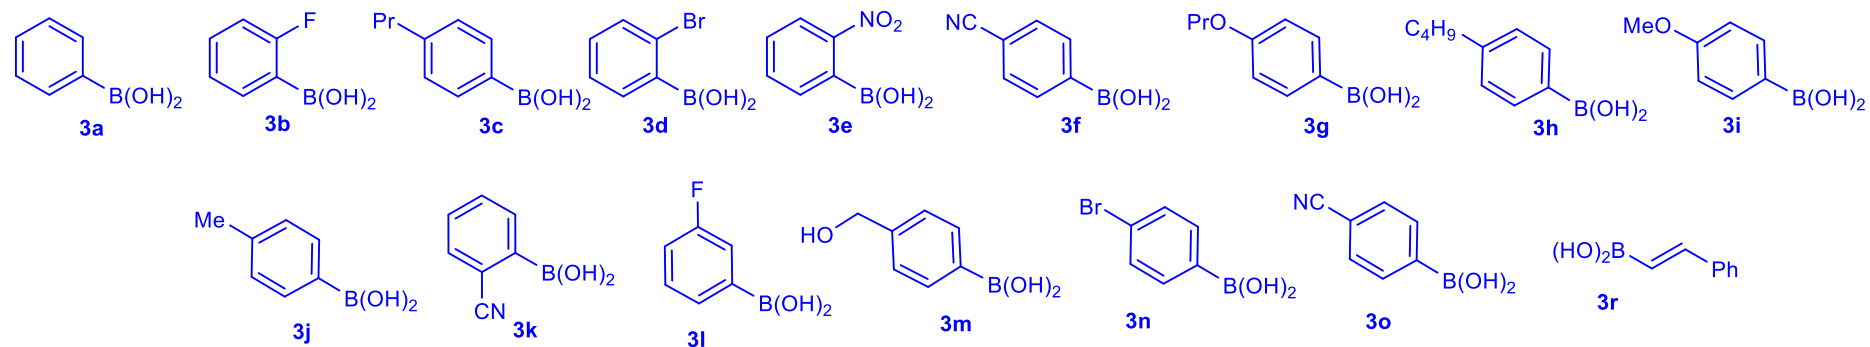

**Scheme 2.** Scope of boronic acids **3** used.

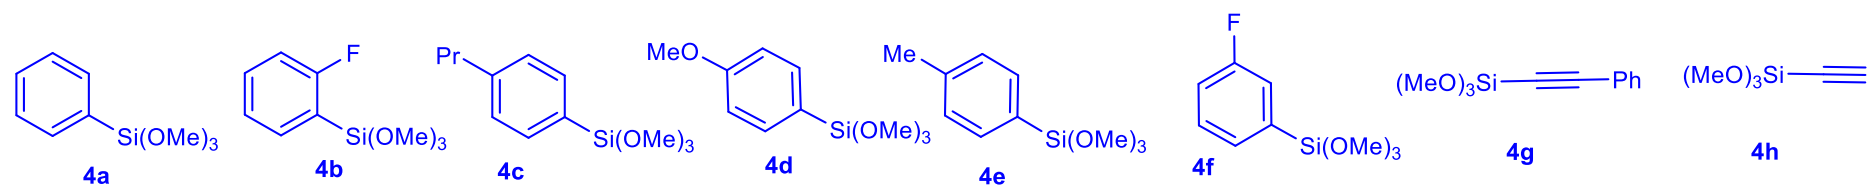

**Scheme 3.** Scope of aryl trialkoxysilanes **4** used.

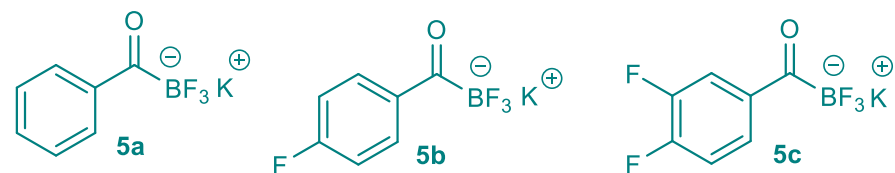

**Scheme 4.** Scope of potassium benzoyltrifluoroborates used.

## A-2. Reaction condition screening.

**Table S1:** Optimization of the mechanochemical reaction conditions.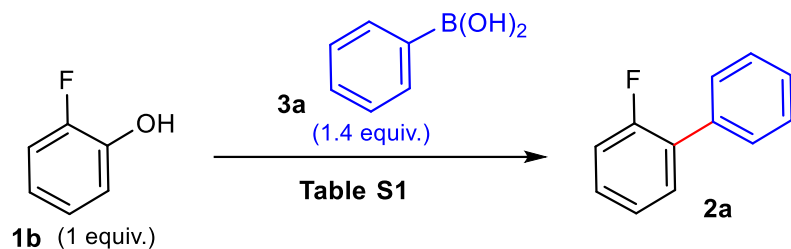

| Table S1                     |                                                                                                                                                                            |                                |                        |
|------------------------------|----------------------------------------------------------------------------------------------------------------------------------------------------------------------------|--------------------------------|------------------------|
| Entr.                        | Reaction components                                                                                                                                                        | Frequency/Time/<br>Temperature | yield<br>(%) <b>2a</b> |
| 1                            | [Cp*Ru(Napht)]BF <sub>4</sub> (0.1 equiv.), CsF (0.3 equiv.), DABCO (1.2 equiv.), ZrN (4 equiv.).                                                                          | 30Hz/90min/r.t.                | 12                     |
| 2                            | [Cp*Ru(Napht)]BF <sub>4</sub> (0.1 equiv.), CsF (0.3 equiv.), DABCO (1.2 equiv.), 1,4-dioxane (0.3 mL), ZrN (4 equiv.).                                                    | 30Hz/90min/r.t.                | 43                     |
| 3                            | [Cp*Ru(Napht)]BF <sub>4</sub> (0.1 equiv.), KF (0.3 equiv.), DABCO (1.2 equiv.), 1,4-dioxane (0.3 mL), ZrN (4 equiv.).                                                     | 30Hz/90min/r.t.                | 45                     |
| 4                            | [Cp*Ru(Napht)]BF <sub>4</sub> (0.1 equiv.), NaF (0.3 equiv.), DABCO (1.2 equiv.), 1,4-dioxane (0.3 mL), ZrN (4 equiv.).                                                    | 30Hz/90min/r.t.                | 28                     |
| 5                            | [Cp*RuCl <sub>2</sub> ] <sub>2</sub> (0.1 equiv.), KF (0.3 equiv.), DABCO (1.2 equiv.), 1,4-dioxane (0.3 mL), ZrN (4 equiv.).                                              | 30Hz/90min/r.t.                | 0                      |
| 6                            | [Cp*RuCl] <sub>4</sub> (0.1 equiv.), KF (0.3 equiv.), DABCO (1.2 equiv.), 1,4-dioxane (0.3 mL), ZrN (4 equiv.).                                                            | 30Hz/90min/r.t.                | 0                      |
| 7                            | [( <i>p</i> -cymene)RuCl <sub>2</sub> ] <sub>2</sub> (0.1 equiv.), KF (0.3 equiv.), DABCO (1.2 equiv.), 1,4-dioxane (0.3 mL), ZrN (4 equiv.).                              | 30Hz/90min/r.t.                | 22                     |
| 8                            | [(C <sub>6</sub> H <sub>6</sub> ) <sub>2</sub> RuCl <sub>2</sub> ] <sub>2</sub> (0.1 equiv.), KF (0.3 equiv.), DABCO (1.2 equiv.), 1,4-dioxane (0.3 mL), ZrN (4 equiv.).   | 30Hz/90min/r.t.                | 0                      |
| 9                            | [(C <sub>6</sub> H <sub>6</sub> ) <sub>2</sub> Ru](BF <sub>4</sub> ) <sub>2</sub> (0.1 equiv.), KF (0.3 equiv.), DABCO (1.2 equiv.), 1,4-dioxane (0.3 mL), ZrN (4 equiv.). | 30Hz/90min/r.t.                | 17                     |
| 10                           | [Cp*Ru(MeCN) <sub>3</sub> ](BF <sub>4</sub> ) <sub>2</sub> (0.1 equiv.), KF (0.3 equiv.), DABCO (1.2 equiv.), 1,4-dioxane (0.3 mL), ZrN (4 equiv.).                        | 30Hz/90min/r.t.                | 21                     |
| 11                           | [Cp*Ru(PhCl)]PF <sub>6</sub> (0.1 equiv.), KF (0.3 equiv.), DABCO (1.2 equiv.), 1,4-dioxane (0.3 mL), ZrN (4 equiv.).                                                      | 30Hz/90min/r.t.                | 61                     |
| <b>12</b>                    | <b>[Cp*Ru(PhCl)]BF<sub>4</sub> (0.1 equiv.), KF (0.3 equiv.), DABCO (1.2 equiv.), 1,4-dioxane (0.3 mL), ZrN (4 equiv.).</b>                                                | <b>30Hz/90min/r.t.</b>         | <b>81</b>              |
| 13                           | [Cp*Ru(PhCl)]BF <sub>4</sub> (0.1 equiv.), NaF (0.3 equiv.), DABCO (1.2 equiv.), 1,4-dioxane (0.3 mL), ZrN (4 equiv.).                                                     | 30Hz/90min/r.t.                | 33                     |
| 14                           | [Cp*Ru(PhCl)]BF <sub>4</sub> (0.1 equiv.), CsF (0.3 equiv.), DABCO (1.2 equiv.), 1,4-dioxane (0.3 mL), ZrN (4 equiv.).                                                     | 30Hz/90min/r.t.                | 67                     |
| <b>Reactions in solution</b> |                                                                                                                                                                            |                                |                        |
| 15                           | [Cp*Ru(PhCl)]BF <sub>4</sub> (0.1 equiv.), KF (0.3 equiv.), DABCO (1.2 equiv.) ZrN (4 equiv.), toluene, reflux.                                                            | -----/24 h                     | 0                      |
| 16                           | [Cp*Ru(PhCl)]BF <sub>4</sub> (0.1 equiv.), KF (0.3 equiv.), DABCO (1.2 equiv.) ZrN (4 equiv.), benzene, reflux.                                                            | -----/24 h                     | 0                      |
| 17                           | [Cp*Ru(PhCl)]BF <sub>4</sub> (0.1 equiv.), KF (0.3 equiv.), DABCO (1.2 equiv.) ZrN (4 equiv.), 1,4-dioxan, reflux.                                                         | -----/24h                      | 0                      |
| 18                           | [Cp*Ru(PhCl)]BF <sub>4</sub> (0.1 equiv.), KF (0.3 equiv.), DABCO (1.2 equiv.) ZrN (4 equiv.), xylenes, 130 °C.                                                            | -----/24h                      | 0                      |
| 19                           | [Cp*Ru(PhCl)]BF <sub>4</sub> (0.1 equiv.), KF (0.3 equiv.), DABCO (1.2 equiv.) ZrN (4 equiv.), neat, 165 °C.                                                               | -----/24h                      | 0                      |

**Table S2:** Optimization of the mechanochemical reaction conditions.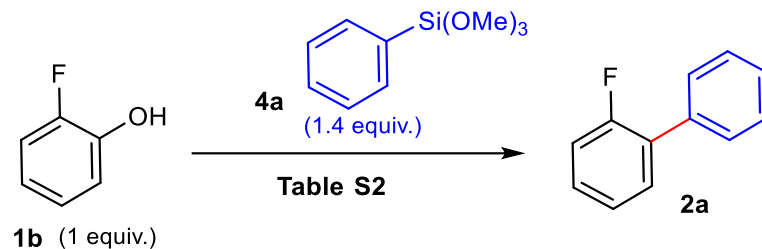

| Table S2              |                                                                                                                              |                                |                        |
|-----------------------|------------------------------------------------------------------------------------------------------------------------------|--------------------------------|------------------------|
| Entr.                 | Reaction components                                                                                                          | Frequency/Time/<br>Temperature | yield<br>(%) <b>2a</b> |
| 1                     | [Cp*Ru(PhCl)]BF <sub>4</sub> (0.1 equiv.), KF (0.3 equiv.), DABCO (1.2 equiv.), 1,4-dioxane (0.3 mL), ZrN (4 equiv.).        | 30Hz/90min/r.t.                | 52                     |
| 2                     | [Cp*Ru(PhCl)]BF <sub>4</sub> (0.1 equiv.), NaF (0.3 equiv.), DABCO (1.2 equiv.), 1,4-dioxane (0.3 mL), ZrN (4 equiv.).       | 30Hz/90min/r.t.                | 29                     |
| <b>3</b>              | <b>[Cp*Ru(PhCl)]BF<sub>4</sub> (0.1 equiv.), CsF (0.3 equiv.), DABCO (1.2 equiv.), 1,4-dioxane (0.3 mL), ZrN (4 equiv.).</b> | <b>30Hz/90min/r.t.</b>         | <b>78</b>              |
| Reactions in solution |                                                                                                                              |                                |                        |
| 4                     | [Cp*Ru(PhCl)]BF <sub>4</sub> (0.1 equiv.), CsF (0.3 equiv.), DABCO (1.2 equiv.) ZrN (4 equiv.), toluene, reflux.             | -----/24 h                     | 0                      |
| 5                     | [Cp*Ru(PhCl)]BF <sub>4</sub> (0.1 equiv.), CsF (0.3 equiv.), DABCO (1.2 equiv.) ZrN (4 equiv.), benzene, reflux.             | -----/24 h                     | 0                      |
| 6                     | [Cp*Ru(PhCl)]BF <sub>4</sub> (0.1 equiv.), CsF (0.3 equiv.), DABCO (1.2 equiv.) ZrN (4 equiv.), 1,4-dioxan, reflux.          | -----/24h                      | 0                      |
| 7                     | [Cp*Ru(PhCl)]BF <sub>4</sub> (0.1 equiv.), CsF (0.3 equiv.), DABCO (1.2 equiv.) ZrN (4 equiv.), xylenes, 130 °C.             | -----/24h                      | 0                      |
| 8                     | [Cp*Ru(PhCl)]BF <sub>4</sub> (0.1 equiv.), CsF (0.3 equiv.), DABCO (1.2 equiv.) ZrN (4 equiv.), neat, 165 °C.                | -----/24h                      | 0                      |

**Table S3:** Optimization of the mechanochemical reaction conditions.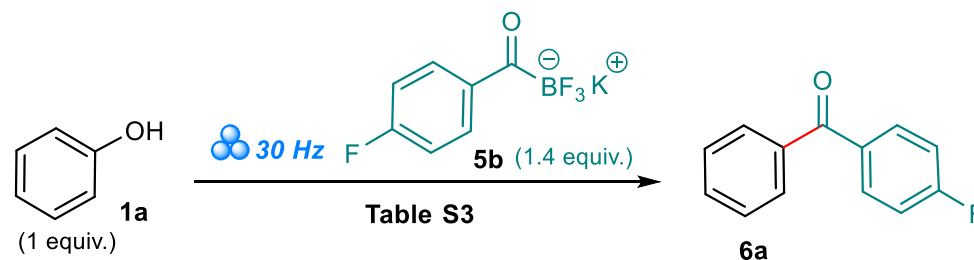

| Table S3 |                     |                                |                        |
|----------|---------------------|--------------------------------|------------------------|
| Entr.    | Reaction components | Frequency/Time/<br>Temperature | yield<br>(%) <b>6a</b> |
|          |                     |                                |                        |

|    |                                                                                                                                                            |                         |           |
|----|------------------------------------------------------------------------------------------------------------------------------------------------------------|-------------------------|-----------|
| 1  | [Cp*Ru(PhCl)]PF <sub>6</sub> (0.1 equiv.), KF (0.3 equiv.), DABCO (1.2 equiv.), 1,4-dioxane (0.3 mL), ZrN (4 equiv.).                                      | 30Hz/90min/r.t.         | 0         |
| 2  | [Cp*Ru(PhCl)]BF <sub>4</sub> (0.1 equiv.), KF (0.3 equiv.), DABCO (1.2 equiv.), 1,4-dioxane (0.3 mL), ZrN (4 equiv.).                                      | 30Hz/90min/r.t.         | 0         |
| 3  | [Cp*Ru(PhCl)]BF <sub>4</sub> (0.1 equiv.), NaF (0.3 equiv.), DABCO (1.2 equiv.), 1,4-dioxane (0.3 mL), ZrN (4 equiv.).                                     | 30Hz/90min/r.t.         | 0         |
| 4  | [Cp*Ru(PhCl)]BF <sub>4</sub> (0.1 equiv.), CsF (0.3 equiv.), DABCO (1.2 equiv.), 1,4-dioxane (0.3 mL), ZrN (4 equiv.).                                     | 30Hz/90min/r.t.         | 0         |
| 5  | [Cp*Ru(PhCl)]BF <sub>4</sub> (0.1 equiv.), CsF (0.3 equiv.), DABCO (1.2 equiv.), 1,4-dioxane (0.3 mL), BaBeO <sub>2</sub> (2 equiv.).                      | 30Hz/90min/r.t.         | 0         |
| 6  | [Cp*Ru(Napht)]BF <sub>4</sub> (0.1 equiv.), KF (0.3 equiv.), DABCO (1.2 equiv.), 1,4-dioxane (0.3 mL), ZrN (4 equiv.).                                     | 30Hz/90min/r.t.         | 0         |
| 7  | [Cp*Ru(Napht)]BF <sub>4</sub> (0.1 equiv.), NaF (0.3 equiv.), DABCO (1.2 equiv.), 1,4-dioxane (0.3 mL), ZrN (4 equiv.).                                    | 30Hz/90min/r.t.         | 0         |
| 8  | [Cp*Ru(Napht)]BF <sub>4</sub> (0.1 equiv.), CsF (0.3 equiv.), DABCO (1.2 equiv.), 1,4-dioxane (0.3 mL), ZrN (4 equiv.).                                    | 30Hz/90min/r.t.         | 0         |
| 9  | [Cp*Ru(Napht)]BF <sub>4</sub> (0.1 equiv.), KF (0.3 equiv.), DABCO (1.2 equiv.), 1,4-dioxane (0.3 mL), HfN (4 equiv.).                                     | 30Hz/90min/r.t.         | 0         |
| 10 | [Cp*Ru(Napht)]BF <sub>4</sub> (0.1 equiv.), KF (0.3 equiv.), DABCO (1.2 equiv.), 1,4-dioxane (0.3 mL), ZrN (4 equiv.), BaBeO <sub>2</sub> (2 equiv.).      | 30Hz/90min/r.t.         | 17        |
| 11 | [Cp*Ru(Napht)]BF <sub>4</sub> (0.1 equiv.), KF (0.3 equiv.), DABCO (1.2 equiv.), 1,4-dioxane (0.3 mL), ZrN (4 equiv.), LiNbO <sub>3</sub> (2 equiv.).      | 30Hz/90min/r.t.         | 29        |
| 12 | [Cp*Ru(Napht)]BF <sub>4</sub> (0.1 equiv.), KF (0.3 equiv.), DABCO (1.2 equiv.), 1,4-dioxane (0.3 mL), ZrN (4 equiv.), SrTiO <sub>3</sub> (2 equiv.).      | 30Hz/90min/r.t.         | 11        |
| 13 | [Cp*Ru(Napht)]BF <sub>4</sub> (0.1 equiv.), KF (0.3 equiv.), DABCO (1.2 equiv.), 1,4-dioxane (0.3 mL), ZrN (4 equiv.), ZnO (2 equiv.).                     | 30Hz/90min/r.t.         | Trace     |
| 14 | [Cp*Ru(Napht)]BF <sub>4</sub> (0.1 equiv.), KF (0.3 equiv.), DABCO (1.2 equiv.), 1,4-dioxane (0.3 mL), ZrN (4 equiv.), BaTiO <sub>3</sub> (2 equiv.).      | 30Hz/90min/r.t.         | 90        |
| 15 | <b>[Cp*Ru(Napht)]BF<sub>4</sub> (0.1 equiv.), KF (0.3 equiv.), DABCO (1.2 equiv.), 1,4-dioxane (0.3 mL), ZrN (2 equiv.), BaTiO<sub>3</sub> (2 equiv.).</b> | <b>30Hz/120min/r.t.</b> | <b>89</b> |
| 16 | [Cp*Ru(Napht)]BF <sub>4</sub> (0.1 equiv.), NaF (0.3 equiv.), DABCO (1.2 equiv.), 1,4-dioxane (0.3 mL), ZrN (2 equiv.), BaTiO <sub>3</sub> (2 equiv.).     | 30Hz/90min/r.t.         | 54        |
| 17 | [Cp*Ru(Napht)]BF <sub>4</sub> (0.1 equiv.), CsF (0.3 equiv.), DABCO (1.2 equiv.), 1,4-dioxane (0.3 mL), ZrN (2 equiv.), BaTiO <sub>3</sub> (2 equiv.).     | 30Hz/90min/r.t.         | 89        |
|    | <b>Reactions in solution</b>                                                                                                                               |                         |           |
| 18 | [Cp*Ru(Napht)]BF <sub>4</sub> (0.1 equiv.), KF (0.3 equiv.), DABCO (1.2 equiv.), ZrN (2 equiv.), BaTiO <sub>3</sub> (2 equiv.), toluene, reflux.           | -----/24 h              | 0         |
| 19 | [Cp*Ru(Napht)]BF <sub>4</sub> (0.1 equiv.), KF (0.3 equiv.), DABCO (1.2 equiv.), ZrN (2 equiv.), BaTiO <sub>3</sub> (2 equiv.), benzene, reflux.           | -----/24 h              | 0         |
| 20 | [Cp*Ru(Napht)]BF <sub>4</sub> (0.1 equiv.), KF (0.3 equiv.), DABCO (1.2 equiv.), ZrN (2 equiv.), BaTiO <sub>3</sub> (2 equiv.), 1,4-dioxane, reflux.       | -----/24h               | 0         |
| 21 | [Cp*Ru(Napht)]BF <sub>4</sub> (0.1 equiv.), KF (0.3 equiv.), DABCO (1.2 equiv.), ZrN (2 equiv.), BaTiO <sub>3</sub> (2 equiv.), xylenes, 130 °C.           | -----/24h               | 0         |
| 22 | [Cp*Ru(Napht)]BF <sub>4</sub> (0.1 equiv.), KF (0.3 equiv.), DABCO (1.2 equiv.), ZrN (2 equiv.), BaTiO <sub>3</sub> (2 equiv.), neat, 165 °C.              | -----/24h               | 0         |

### A-3. Reaction procedure with optimised reaction conditions.

#### **General procedure for the synthesis of biaryls 2 starting from phenols 1 and boronic acids 3:**

In a glovebox under the constant purge of argon, 5 mL grinding vessel (made of stainless) equipped with two balls (made of stainless, diameter: 5 mm) was loaded consecutively with the starting phenol **1** (1 mmol, 1 equiv.), catalyst [Cp\*Ru(PhCl)]BF<sub>4</sub> (43 mg, 0.1 mmol, 0.1 equiv.), an appropriate boronic acid (1.4 mmol, 1.4 equiv.), KF (17 mg, 0.3 mmol, 0.3 equiv.), DABCO (135 mg, 1.2 mmol, 1.2 equiv.), ZrN (420 mg, 4 mmol, 4 equiv.), and 0.3 mL of 1,4-dioxane. The reaction vessel was properly capped. Finally, the vessel was installed on the mill and subjected to milling at 30Hz for 90 minutes at room temperature. The

content of the vessel was generously treated with distilled water, filtrated and properly dried in vacuum. The resulting crude product was directly subjected to gradient flash chromatography on silica gel to isolate the desired product **2**.

The gram scale synthesis was performed on 10 mmol of the starting phenol **1** in 25 mL grinding vessel using three 10 mm balls.

***General procedure for the synthesis of biaryls arenes 2 starting from phenols 1 and aryl trialkoxysilanes 4:***

In a glovebox under the constant purge of argon, 5 mL grinding vessel (made of stainless) equipped with two balls (made of stainless, diameter: 5 mm) was loaded consecutively with the starting phenol **1** (1 mmol, 1 equiv.), catalyst [Cp\*Ru(PhCl)]BF<sub>4</sub> (43 mg, 0.1 mmol, 0.1 equiv.), an appropriate aryl trialkoxysilanes (1.4 mmol, 1.4 equiv.), CsF (46 mg, 0.3 mmol, 0.3 equiv.), DABCO (135 mg, 1.2 mmol, 1.2 equiv.), ZrN (420 mg, 4 mmol, 4 equiv.), and 0.3 mL of 1,4-dioxane. The reaction vessel was properly capped. Finally, the vessel was installed on the mill and subjected to milling at 30Hz for 90 minutes at room temperature. The content of the vessel was generously treated with distilled water, filtrated and properly dried in vacuum. The resulting crude product was directly subjected to gradient flash chromatography on silica gel to isolate the desired product **2**.

The gram scale synthesis was performed on 10 mmol of the starting phenol **1** in 25 mL grinding vessel using three 10 mm balls.

***General procedure for the synthesis of benzophenones 6 starting from phenols 1 and benzoyltrifluoroborates 5:***

In a glovebox under the constant purge of argon, 5 mL grinding vessel (made of stainless) equipped with two balls (made of stainless, diameter: 5 mm) was loaded consecutively with the starting phenol **1** (1 mmol, 1 equiv.), catalyst [Cp\*Ru(Napht)]BF<sub>4</sub> (44 mg, 0.1 mmol, 0.1 equiv.), an appropriate benzoyltrifluoroborate (1.4 mmol, 1.4 equiv.), KF (17 mg, 0.3 mmol, 0.3 equiv.), DABCO (135 mg, 1.2 mmol, 1.2 equiv.), ZrN (210 mg, 2 mmol, 2 equiv.), BaTiO<sub>3</sub> (466 mg, 2 mmol, 2 equiv.) and 0.3 mL of 1,4-dioxane. The reaction vessel was properly capped. Finally, the vessel was installed on the mill and subjected to milling at 30Hz for 120 minutes at room temperature. The content of the vessel was generously treated with distilled water, filtrated and properly dried in vacuum. The resulting crude product was directly subjected to gradient flash chromatography on silica gel to isolate the desired product **6**.

The gram scale synthesis was performed on 10 mmol of the starting phenol **1** in 25 mL grinding vessel using three 10 mm balls.



## (B) Characterization of products.

### *2-fluoro-1,1'-biphenyl 2a*

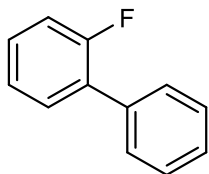

The title compound was prepared starting from phenol **1b** (112 mg, 1 mmol, 1 equiv.), catalyst [Cp\**Ru*(PhCl)]BF<sub>4</sub> (43 mg, 0.1 mmol, 0.1 equiv.), boronic acid **3a** (171 mg, 1.4 mmol, 1.4 equiv.), KF (17 mg, 0.3 mmol, 0.3 equiv.), DABCO (135 mg, 1.2 mmol, 1.2 equiv.), ZrN (420 mg, 4 mmol, 4 equiv.), and 0.3 mL of 1,4-dioxane. The purification was accomplished by column chromatography on silica gel to provide the desired product **2a** (139 mg, 0.81 mmol, 81%). The gram scale synthesis was performed on 10 mmol of the starting **1b** and **2a** was prepared in 77% yield (1.32 g, 7.7 mmol).

Alternatively the title compound was prepared starting from phenol **1b** (112 mg, 1 mmol, 1 equiv.), [Cp\**Ru*(PhCl)]BF<sub>4</sub> (43 mg, 0.1 mmol, 0.1 equiv.), potassium trifluoro(phenyl)borate (256 mg, 1.4 mmol, 1.4 equiv.), KF (17 mg, 0.3 mmol, 0.3 equiv.), DABCO (135 mg, 1.2 mmol, 1.2 equiv.), ZrN (420 mg, 4 mmol, 4 equiv.), and 0.3 mL of 1,4-dioxane. The purification was accomplished by column chromatography on silica gel to provide the desired product **2a** (120 mg, 0.70 mmol, 70%).

Alternatively the title compound was prepared starting from phenol **1b** (112 mg, 1 mmol, 1 equiv.), [Cp\**Ru*(PhCl)]BF<sub>4</sub> (43 mg, 0.1 mmol, 0.1 equiv.), aryl trialkoxysilanes **4a** (277 mg, 1.4 mmol, 1.4 equiv.), CsF (46 mg, 0.3 mmol, 0.3 equiv.), DABCO (135 mg, 1.2 mmol, 1.2 equiv.), ZrN (420 mg, 4 mmol, 4 equiv.), and 0.3 mL of 1,4-dioxane. The purification was accomplished by column chromatography on silica gel to provide the desired product **2a** (134 mg, 0.78 mmol, 78%). The gram scale synthesis was performed on 10 mmol of the starting **1b** and **2a** was prepared in 77% yield (1.32 g, 7.7 mmol).

Alternatively the title compound was prepared starting from phenol **1a** (94 mg, 1 mmol, 1 equiv.), [Cp\**Ru*(PhCl)]BF<sub>4</sub> (43 mg, 0.1 mmol, 0.1 equiv.), boronic acid **3b** (196 mg, 1.4 mmol, 1.4 equiv.), KF (17 mg, 0.3 mmol, 0.3 equiv.), DABCO (135 mg, 1.2 mmol, 1.2 equiv.), ZrN (420 mg, 4 mmol, 4 equiv.), and 0.3 mL of 1,4-dioxane. The purification was accomplished by column chromatography on silica gel to provide the desired product **2a** (143 mg, 0.83 mmol, 83%).

Alternatively the title compound was prepared starting from phenol **1a** (94 mg, 1 mmol, 1 equiv.), [Cp\*Ru(PhCl)]BF<sub>4</sub> (43 mg, 0.1 mmol, 0.1 equiv.), potassium trifluoro(2-fluorophenyl)borate (283 mg, 1.4 mmol, 1.4 equiv.), KF (17 mg, 0.3 mmol, 0.3 equiv.), DABCO (135 mg, 1.2 mmol, 1.2 equiv.), ZrN (420 mg, 4 mmol, 4 equiv.), and 0.3 mL of 1,4-dioxane. The purification was accomplished by column chromatography on silica gel to provide the desired product **2a** (124 mg, 0.72 mmol, 72%).

The title compound was prepared starting from phenol **1a** (94 mg, 1 mmol, 1 equiv.), [Cp\*Ru(PhCl)]BF<sub>4</sub> (43 mg, 0.1 mmol, 0.1 equiv.), aryl trialkoxysilanes **4b** (302 mg, 1.4 mmol, 1.4 equiv.), CsF (46 mg, 0.3 mmol, 0.3 equiv.), DABCO (135 mg, 1.2 mmol, 1.2 equiv.), ZrN (420 mg, 4 mmol, 4 equiv.), and 0.3 mL of 1,4-dioxane. The purification was accomplished by column chromatography on silica gel to provide the desired product **2a** (137 mg, 0.80 mmol, 80%).

White solid, mp 173 - 175 °C. <sup>1</sup>H NMR (500 MHz, DMSO-*d*<sub>6</sub>): δ = 7.28 – 7.32 (m, 2H, CH<sub>Ar</sub>), 7.38 – 7.42 (m, 2H, CH<sub>Ar</sub>), 7.46 – 7.49 (m, 2H, CH<sub>Ar</sub>), 7.51 – 7.55 (m, 3H, CH<sub>Ar</sub>).

<sup>13</sup>C{<sup>1</sup>H} NMR (126 MHz, DMSO-*d*<sub>6</sub>): δ = 116.1 (d, *J*<sub>CF</sub> = 20.0 Hz), 124.9 (d, *J*<sub>CF</sub> = 3.4 Hz), 127.8, 128.2 (d, *J*<sub>CF</sub> = 12.7 Hz), 128.6, 128.8 (m), 129.5 (d, *J*<sub>CF</sub> = 9.2 Hz), 130.7 (d, *J*<sub>CF</sub> = 3.0 Hz), 135.1, 159.1 (d, <sup>1</sup>*J*<sub>CF</sub> = 252.7 Hz).

MS (GC, 70eV): *m/z* (%) = 172 (M<sup>+</sup>, 100), 85 (17).

Anal. calcd. for C<sub>12</sub>H<sub>9</sub>F: C, 83.70; H, 5.27. Found: C, 83.76; H, 5.32.

#### **4-propyl-1,1'-biphenyl 2b**

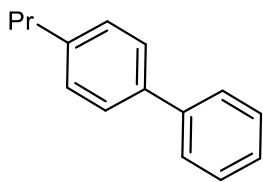

The title compound was prepared starting from phenol **1c** (136 mg, 1 mmol, 1 equiv.), [Cp\*Ru(PhCl)]BF<sub>4</sub> (43 mg, 0.1 mmol, 0.1 equiv.), boronic acid **3a** (171 mg, 1.4 mmol, 1.4 equiv.), KF (17 mg, 0.3 mmol, 0.3 equiv.), DABCO (135 mg, 1.2 mmol, 1.2 equiv.), ZrN (420 mg, 4 mmol, 4 equiv.), and 0.3 mL of 1,4-dioxane. The purification was accomplished by column chromatography on silica gel to provide the desired product **2b** (161 mg, 0.82 mmol, 82%).

Alternatively the title compound was prepared starting from phenol **1c** (136 mg, 1 mmol, 1 equiv.), [Cp\*Ru(PhCl)]BF<sub>4</sub> (43 mg, 0.1 mmol, 0.1 equiv.), aryl trialkoxysilanes **4a** (277 mg, 1.4 mmol, 1.4 equiv.), CsF (46 mg, 0.3 mmol, 0.3 equiv.), DABCO (135 mg, 1.2 mmol, 1.2 equiv.), ZrN (420 mg, 4 mmol, 4 equiv.), and 0.3 mL of 1,4-dioxane. The purification was accomplished by column chromatography on silica gel to provide the desired product **2b** (168 mg, 0.86 mmol, 86%).

Alternatively the title compound was prepared starting from phenol **1a** (94 mg, 1 mmol, 1 equiv.), [Cp\*Ru(PhCl)]BF<sub>4</sub> (43 mg, 0.1 mmol, 0.1 equiv.), boronic acid **3c** (230 mg, 1.4 mmol, 1.4 equiv.), KF (17 mg, 0.3 mmol, 0.3 equiv.), DABCO (135 mg, 1.2 mmol, 1.2 equiv.), ZrN (420 mg, 4 mmol, 4 equiv.), and 0.3 mL of 1,4-dioxane. The purification was accomplished by column chromatography on silica gel to provide the desired product **2b** (167 mg, 0.85 mmol, 85%).

The title compound was prepared starting from phenol **1a** (94 mg, 1 mmol, 1 equiv.), [Cp\*Ru(PhCl)]BF<sub>4</sub> (43 mg, 0.1 mmol, 0.1 equiv.), aryl trialkoxysilanes **4c** (336 mg, 1.4 mmol, 1.4 equiv.), CsF (46 mg, 0.3 mmol, 0.3 equiv.), DABCO (135 mg, 1.2 mmol, 1.2 equiv.), ZrN (420 mg, 4 mmol, 4 equiv.), and 0.3 mL of 1,4-dioxane. The purification was accomplished by column chromatography on silica gel to provide the desired product **2b** (167 mg, 0.85 mmol, 85%).

Yellow low melting solid. <sup>1</sup>H NMR (500 MHz, CDCl<sub>3</sub>): δ = 1.15 (dt, 3H, <sup>3</sup>J = 7.3 Hz, <sup>4</sup>J = 1.2 Hz, CH<sub>3</sub>), 1.82 – 1.87 (m, 2H, CH<sub>2</sub>), 2.79 (t, 2H, <sup>3</sup>J = 7.3 Hz, CH<sub>2</sub>), 7.41 (d, 2H, <sup>3</sup>J = 8.0 Hz, CH<sub>Ar</sub>), 7.47 – 7.49 (m, 1H, CH<sub>Ar</sub>), 7.57 (t, 2H, <sup>3</sup>J = 7.7 Hz, CH<sub>Ar</sub>), 7.68 (d, 2H, <sup>3</sup>J = 8.0 Hz, CH<sub>Ar</sub>), 7.75 (d, 2H, <sup>3</sup>J = 8.0 Hz, CH<sub>Ar</sub>).

<sup>13</sup>C{<sup>1</sup>H} NMR (126 MHz, CDCl<sub>3</sub>): δ = 13.9, 24.5, 37.7, 126.9, 128.7, 128.9, 138.5, 141.7, 141.8.

MS (GC, 70eV): m/z (%) = 196 (M<sup>+</sup>, 26), 167 (100), 152 (12).

Anal. calcd. for C<sub>15</sub>H<sub>16</sub>: C, 91.78; H, 8.22. Found: C, 91.69; H, 8.31.

### **2-bromo-1,1'-biphenyl 2c**

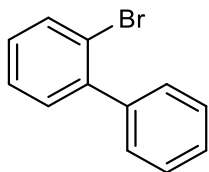

The title compound was prepared starting from phenol **1d** (173 mg, 1 mmol, 1 equiv.), catalyst [Cp\*Ru(PhCl)]BF<sub>4</sub> (43 mg, 0.1 mmol, 0.1 equiv.), boronic acid **3a** (171 mg, 1.4 mmol, 1.4 equiv.), KF (17 mg, 0.3 mmol, 0.3 equiv.), DABCO (135 mg, 1.2 mmol, 1.2 equiv.), ZrN (420 mg, 4 mmol, 4 equiv.), and 0.3 mL of 1,4-dioxane. The purification was accomplished by column chromatography on silica gel to provide the desired product **2c** (172 mg, 0.74 mmol, 74%).

Alternatively the title compound was prepared starting from phenol **1a** (94 mg, 1 mmol, 1 equiv.), catalyst [Cp\*Ru(PhCl)]BF<sub>4</sub> (43 mg, 0.1 mmol, 0.1 equiv.), boronic acid **3d** (280 mg, 1.4 mmol, 1.4 equiv.), KF (17 mg, 0.3 mmol, 0.3 equiv.), DABCO (135 mg, 1.2 mmol, 1.2 equiv.), ZrN (420 mg, 4 mmol, 4 equiv.), and 0.3 mL of 1,4-dioxane. The purification was accomplished by column chromatography on silica gel to provide the desired product **2c** (182 mg, 0.78 mmol, 78%).

Yellow liquid <sup>1</sup>H NMR (500 MHz, DMSO-*d*<sub>6</sub>): δ = 7.28 – 7.31 (m, 1H, CH<sub>Ar</sub>), 7.35 – 7.40 (m, 4H, CH<sub>Ar</sub>), 7.40 – 7.46 (m, 3H, CH<sub>Ar</sub>), 7.72 (d, 1H, <sup>3</sup>J = 8.1 Hz, CH<sub>Ar</sub>).

<sup>13</sup>C{<sup>1</sup>H} NMR (126 MHz, DMSO-*d*<sub>6</sub>): δ = 122.3, 128.1, 128.4, 128.6, 129.6, 129.8, 131.9, 133.4, 140.9, 142.3.

MS (GC, 70eV): m/z (%) = 233 (M<sup>+</sup>, 17), 232 (64), 181 (21), 152 (100).

Anal. calcd. for C<sub>12</sub>H<sub>9</sub>Br: C, 61.83; H, 3.89. Found: C, 61.89; H, 3.91.

### **2-nitro-1,1'-biphenyl 2d**

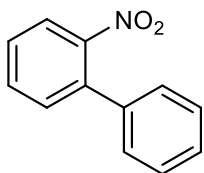

The title compound was prepared starting from phenol **1e** (139 mg, 1 mmol, 1 equiv.), catalyst [Cp\*Ru(PhCl)]BF<sub>4</sub> (43 mg, 0.1 mmol, 0.1 equiv.), boronic acid **3a** (171 mg, 1.4 mmol, 1.4 equiv.), KF (17 mg, 0.3 mmol, 0.3 equiv.), DABCO (135 mg, 1.2 mmol, 1.2 equiv.), ZrN (420 mg, 4 mmol, 4 equiv.), and 0.3 mL of 1,4-dioxane. The purification was accomplished by column chromatography on silica gel to provide the desired product **2d** (153 mg, 0.77 mmol, 77%).

Alternatively the title compound was prepared starting from phenol **1e** (139 mg, 1 mmol, 1 equiv.), catalyst [Cp\*Ru(PhCl)]BF<sub>4</sub> (43 mg, 0.1 mmol, 0.1 equiv.), aryl trialkoxysilanes **4a** (277 mg, 1.4 mmol, 1.4 equiv.), CsF (46 mg, 0.3 mmol, 0.3 equiv.), DABCO (135 mg, 1.2 mmol, 1.2 equiv.), ZrN (420 mg, 4 mmol, 4 equiv.),

and 0.3 mL of 1,4-dioxane. The purification was accomplished by column chromatography on silica gel to provide the desired product **2d** (157 mg, 0.79 mmol, 79%).

Alternatively the title compound was prepared starting from phenol **1a** (94 mg, 1 mmol, 1 equiv.), catalyst [Cp\**Ru*(PhCl)]BF<sub>4</sub> (43 mg, 0.1 mmol, 0.1 equiv.), boronic acid **3e** (234 mg, 1.4 mmol, 1.4 equiv.), KF (17 mg, 0.3 mmol, 0.3 equiv.), DABCO (135 mg, 1.2 mmol, 1.2 equiv.), ZrN (420 mg, 4 mmol, 4 equiv.), and 0.3 mL of 1,4-dioxane. The purification was accomplished by column chromatography on silica gel to provide the desired product **2d** (145 mg, 0.73 mmol, 73%).

Yellow solid, mp 36 - 38 °C. <sup>1</sup>H NMR (500 MHz, CDCl<sub>3</sub>): δ = 7.32 – 7.35 (m, 2H, CH<sub>Ar</sub>), 7.41 – 7.51 (m, 5H, CH<sub>Ar</sub>), 7.62 (dt, 1H, <sup>3</sup>J = 7.6 Hz, <sup>4</sup>J = 1.2 Hz, CH<sub>Ar</sub>), 7.86 (dd, 1H, <sup>3</sup>J = 8.1 Hz, <sup>4</sup>J = 1.4 Hz, CH<sub>Ar</sub>).

<sup>13</sup>C{<sup>1</sup>H} NMR (126 MHz, CDCl<sub>3</sub>): δ = 124.0, 127.8, 128.1, 128.2, 128.6, 131.9, 132.5, 136.2, 137.3, 149.2.

MS (GC, 70eV): m/z (%) = 199 (M<sup>+</sup>, 36), 182 (59), 171 (75), 152 (88), 115 (100).

Anal. calcd. for C<sub>12</sub>H<sub>9</sub>NO<sub>2</sub>: C, 72.35; H, 4.55; N, 7.03. Found: C, 72.49; H, 4.39; N, 7.11.

#### **4'-methyl-[1,1'-biphenyl]-4-carbonitrile 2e**

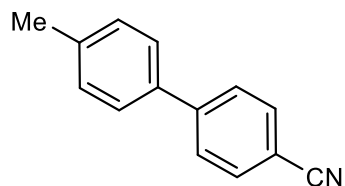

The title compound was prepared starting from phenol **1f** (108 mg, 1 mmol, 1 equiv.), catalyst [Cp\**Ru*(PhCl)]BF<sub>4</sub> (43 mg, 0.1 mmol, 0.1 equiv.), boronic acid **3f** (206 mg, 1.4 mmol, 1.4 equiv.), KF (17 mg, 0.3 mmol, 0.3 equiv.), DABCO (135 mg, 1.2 mmol, 1.2 equiv.), ZrN (420 mg, 4 mmol, 4 equiv.), and 0.3 mL of 1,4-dioxane. The purification was accomplished by column chromatography on silica gel to provide the desired product **2e** (160 mg, 0.83 mmol, 83%).

White solid, mp 108 - 110 °C. <sup>1</sup>H NMR (500 MHz, DMSO-*d*<sub>6</sub>): δ = 2.34 (s, 3H, Me), 7.28 (d, 2H, <sup>3</sup>J = 8.2 Hz, CH<sub>Ar</sub>), 7.60 (d, 2H, <sup>3</sup>J = 8.2 Hz, CH<sub>Ar</sub>), 7.81 (d, 2H, <sup>3</sup>J = 8.1 Hz, CH<sub>Ar</sub>), 7.86 (d, 2H, <sup>3</sup>J = 8.2 Hz, CH<sub>Ar</sub>).

<sup>13</sup>C{<sup>1</sup>H} NMR (126 MHz, DMSO-*d*<sub>6</sub>): δ = 20.7, 109.7, 118.9, 126.8, 127.2, 129.7, 132.7, 135.3, 138.3, 144.5.

MS (GC, 70eV):  $m/z$  (%) = 193 ( $M^+$ , 100), 165 (24).

Anal. calcd. for  $C_{14}H_{11}N$ : C, 87.01; H, 5.74; N, 7.25. Found: C, 87.09; H, 5.63; N, 7.28.

### 2,4-difluoro-1,1'-biphenyl **2f**

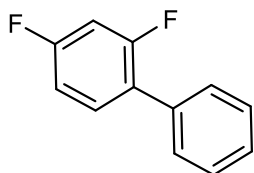

The title compound was prepared starting from phenol **1g** (130 mg, 1 mmol, 1 equiv.), catalyst  $[Cp^*Ru(PhCl)]BF_4$  (43 mg, 0.1 mmol, 0.1 equiv.), boronic acid **3a** (171 mg, 1.4 mmol, 1.4 equiv.), KF (17 mg, 0.3 mmol, 0.3 equiv.), DABCO (135 mg, 1.2 mmol, 1.2 equiv.), ZrN (420 mg, 4 mmol, 4 equiv.), and 0.3 mL of 1,4-dioxane. The purification was accomplished by column chromatography on silica gel to provide the desired product **2f** (160 mg, 0.84 mmol, 84%).

White solid, mp 61 - 63 °C.  $^1H$  NMR (500 MHz,  $DMSO-d_6$ ):  $\delta$  = 7.16 (ddd, 1H,  $^3J = 8.7$  Hz,  $J = 2.7$  Hz,  $J = 0.8$  Hz,  $CH_{Ar}$ ), 7.30 – 7.34 (m, 1H,  $CH_{Ar}$ ), 7.39 (dt, 1H,  $^3J = 7.1$  Hz,  $J = 2.1$  Hz,  $CH_{Ar}$ ), 7.44 – 7.57 (m, 5H,  $CH_{Ar}$ ).

$^{13}C\{^1H\}$  NMR (126 MHz,  $DMSO-d_6$ ):  $\delta$  = 104.5 (t,  $J_{CF} = 26.9$  Hz), 111.9 (dd,  $J_{CF} = 21.1$  Hz,  $J_{CF} = 3.5$  Hz), 124.9 (dd,  $J_{CF} = 13.6$  Hz,  $J_{CF} = 3.1$  Hz), 127.9, 128.6, 128.7 (t,  $J_{CF} = 2.1$  Hz), 131.8 (m), 134.3, 159.1 (dd,  $^1J_{CF} = 249.0$  Hz,  $J_{CF} = 12.6$  Hz), 161.7 (dd,  $^1J_{CF} = 245.5$  Hz,  $J_{CF} = 12.4$  Hz).

MS (GC, 70eV):  $m/z$  (%) = 190 ( $M^+$ , 100), 135 (28).

Anal. calcd. for  $C_{12}H_8F_2$ : C, 75.78; H, 4.24. Found: C, 75.86; H, 4.33.

### 4-propoxy-1,1'-biphenyl **2g**

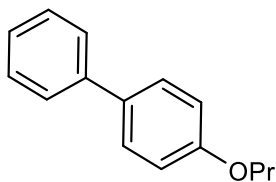

The title compound was prepared starting from phenol **1a** (94 mg, 1 mmol, 1 equiv.), catalyst [Cp\**Ru*(PhCl)]BF<sub>4</sub> (43 mg, 0.1 mmol, 0.1 equiv.), boronic acid **3g** (252 mg, 1.4 mmol, 1.4 equiv.), KF (17 mg, 0.3 mmol, 0.3 equiv.), DABCO (135 mg, 1.2 mmol, 1.2 equiv.), ZrN (420 mg, 4 mmol, 4 equiv.), and 0.3 mL of 1,4-dioxane. The purification was accomplished by column chromatography on silica gel to provide the desired product **2g** (184 mg, 0.87 mmol, 87%).

White solid, mp 76 - 77 °C. <sup>1</sup>H NMR (500 MHz, DMSO-*d*<sub>6</sub>): δ = 0.93 (s, 3H, CH<sub>3</sub>), 1.64 (m, 2H, CH<sub>2</sub>), 3.00 (m, 2H, CH<sub>2</sub>), 7.42 – 7.49 (m, 3H, CH<sub>Ar</sub>), 7.72 – 7.80 (m, 4H, CH<sub>Ar</sub>), 8.02 – 8.03 (m, 2H, CH<sub>Ar</sub>).

<sup>13</sup>C{<sup>1</sup>H} NMR (126 MHz, DMSO-*d*<sub>6</sub>): δ = 13.6, 17.3, 126.9, 127.0, 128.3, 128.6, 129.0, 135.5, 138.9, 144.4, 199.5.

Anal. calcd. for C<sub>12</sub>H<sub>9</sub>NO<sub>2</sub>: C, 72.35; H, 4.55; N, 7.03. Found: C, 72.49; H, 4.39; N, 7.11.

### *N*-phenyl-[1,1'-biphenyl]-4-amine **2h**

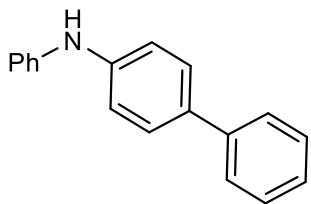

The title compound was prepared starting from phenol **1h** (185 mg, 1 mmol, 1 equiv.), catalyst [Cp\**Ru*(PhCl)]BF<sub>4</sub> (43 mg, 0.1 mmol, 0.1 equiv.), boronic acid **3a** (171 mg, 1.4 mmol, 1.4 equiv.), KF (17 mg, 0.3 mmol, 0.3 equiv.), DABCO (135 mg, 1.2 mmol, 1.2 equiv.), ZrN (420 mg, 4 mmol, 4 equiv.), and 0.3 mL of 1,4-dioxane. The purification was accomplished by column chromatography on silica gel to provide the desired product **2h** (203 mg, 0.83 mmol, 83%).

Alternatively the title compound was prepared starting from phenol **1h** (185 mg, 1 mmol, 1 equiv.), catalyst [Cp\**Ru*(PhCl)]BF<sub>4</sub> (43 mg, 0.1 mmol, 0.1 equiv.), aryl trialkoxysilanes **4a** (277 mg, 1.4 mmol, 1.4 equiv.), CsF (46 mg, 0.3 mmol, 0.3 equiv.), DABCO (135 mg, 1.2 mmol, 1.2 equiv.), ZrN (420 mg, 4 mmol, 4 equiv.), and 0.3 mL of 1,4-dioxane. The purification was accomplished by column chromatography on silica gel to provide the desired product **2h** (196 mg, 0.80 mmol, 80%).

Light Brown solid, mp 113 - 114 °C. <sup>1</sup>H NMR (500 MHz, CDCl<sub>3</sub>): δ = 5.77 (s, 1H, NH), 6.98 (t, 1H, <sup>3</sup>J = 7.4 Hz, CH<sub>Ar</sub>), 7.15 (t, 4H, <sup>3</sup>J = 7.4 Hz, CH<sub>Ar</sub>), 7.30 – 7.34 (m, 3H, CH<sub>Ar</sub>), 7.44 (t, 2H, <sup>3</sup>J = 8.2 Hz, CH<sub>Ar</sub>), 7.53 (d, 2H, <sup>3</sup>J = 8.6 Hz, CH<sub>Ar</sub>), 7.59 (d, 1H, <sup>3</sup>J = 7.4 Hz, CH<sub>Ar</sub>).

<sup>13</sup>C{<sup>1</sup>H} NMR (126 MHz, CDCl<sub>3</sub>): δ = 117.8, 118.1, 121.2, 126.5, 126.6, 128.0, 128.7, 129.4, 133.7, 140.8, 142.6, 142.8.

MS (GC, 70eV):  $m/z$  (%) = 245 ( $M^+$ , 100).

Anal. calcd. for  $C_{18}H_{15}N$ : C, 88.13; H, 6.16; N, 5.71. Found: C, 88.19; H, 6.13; N, 5.68.

### **2-([1,1'-biphenyl]-4-yl)acetonitrile **2i****

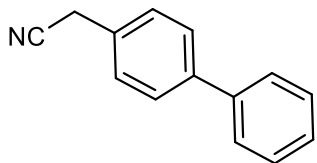

The title compound was prepared starting from phenol **1i** (133 mg, 1 mmol, 1 equiv.), catalyst  $[Cp^*Ru(PhCl)]BF_4$  (43 mg, 0.1 mmol, 0.1 equiv.), boronic acid **3a** (171 mg, 1.4 mmol, 1.4 equiv.), KF (17 mg, 0.3 mmol, 0.3 equiv.), DABCO (135 mg, 1.2 mmol, 1.2 equiv.), ZrN (420 mg, 4 mmol, 4 equiv.), and 0.3 mL of 1,4-dioxane. The purification was accomplished by column chromatography on silica gel to provide the desired product **2i** (203 mg, 0.87 mmol, 87%).

Alternatively the title compound was prepared starting from phenol **1i** (133 mg, 1 mmol, 1 equiv.),  $[Cp^*Ru(PhCl)]BF_4$  (43 mg, 0.1 mmol, 0.1 equiv.), aryl trialkoxysilanes **4a** (277 mg, 1.4 mmol, 1.4 equiv.), CsF (46 mg, 0.3 mmol, 0.3 equiv.), DABCO (135 mg, 1.2 mmol, 1.2 equiv.), ZrN (420 mg, 4 mmol, 4 equiv.), and 0.3 mL of 1,4-dioxane. The purification was accomplished by column chromatography on silica gel to provide the desired product **2i** (196 mg, 0.83 mmol, 83%).

Pink solid, mp 161 - 162 °C.  $^1H$  NMR (500 MHz,  $CDCl_3$ ):  $\delta$  = 3.78 (m, 2H,  $CH_2$ ), 7.40 – 7.42 (m, 3H,  $CH_{Ar}$ ), 7.46 – 7.50 (m, 2H,  $CH_{Ar}$ ), 7.60 – 7.64 (m, 4H,  $CH_{Ar}$ ).

$^{13}C\{^1H\}$  NMR (126 MHz,  $CDCl_3$ ):  $\delta$  = 23.2, 118.0, 127.1, 127.7, 127.9, 128.4, 129.0, 140.2, 141.1.

MS (GC, 70eV):  $m/z$  (%) = 193 ( $M^+$ , 100), 165 (39).

Anal. calcd. for  $C_{14}H_{11}N$ : C, 87.01; H, 5.74; N, 7.25. Found: C, 86.95; H, 5.69; N, 7.36.

### **4'-butyl-[1,1'-biphenyl]-4-carboxylic acid **2j****



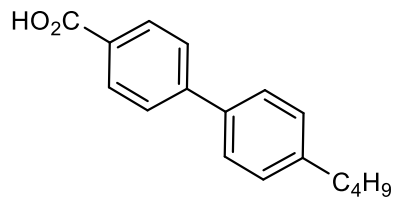

The title compound was prepared starting from phenol **1j** (138 mg, 1 mmol, 1 equiv.), catalyst [Cp\**Ru*(PhCl)]BF<sub>4</sub> (43 mg, 0.1 mmol, 0.1 equiv.), boronic acid **3h** (249 mg, 1.4 mmol, 1.4 equiv.), KF (17 mg, 0.3 mmol, 0.3 equiv.), DABCO (135 mg, 1.2 mmol, 1.2 equiv.), ZrN (420 mg, 4 mmol, 4 equiv.), and 0.3 mL of 1,4-dioxane. The purification was accomplished by column chromatography on silica gel to provide the desired product **2j** (188 mg, 0.74 mmol, 74%).

Colourless liquid <sup>1</sup>H NMR (500 MHz, DMSO-*d*<sub>6</sub>): δ = 0.91 (t, 3H, <sup>3</sup>*J* = 7.6 Hz, CH<sub>3</sub>), 1.31 – 1.35 (m, 2H, CH<sub>2</sub>), 1.56 – 1.60 (m, 2H, CH<sub>2</sub>), 2.62 (t, 2H, <sup>3</sup>*J* = 8.3 Hz, CH<sub>2</sub>), 7.31 (d, 2H, <sup>3</sup>*J* = 7.6 Hz, H<sub>Ar</sub>), 7.64 (d, 2H, <sup>3</sup>*J* = 7.7 Hz, CH<sub>Ar</sub>), 7.77 (d, 2H, <sup>3</sup>*J* = 8.6 Hz, CH<sub>Ar</sub>), 8.00 (d, 2H, <sup>3</sup>*J* = 8.4 Hz, CH<sub>Ar</sub>), 12.94 (s, 1H, OH).

<sup>13</sup>C{<sup>1</sup>H} NMR (126 MHz, DMSO-*d*<sub>6</sub>): δ = 13.7, 21.7, 33.0, 34.4, 126.5, 126.8, 136.3, 142.6, 144.2, 167.1.

Anal. calcd. for C<sub>17</sub>H<sub>18</sub>O<sub>2</sub>: C, 80.28; H, 7.13. Found: C, 80.39; H, 7.16.

#### **5-fluoro-4'-methoxy-[1,1'-biphenyl]-3-carboxylic acid **2k****

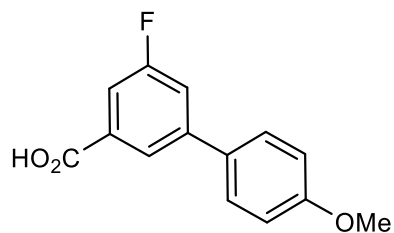

The title compound was prepared starting from phenol **1k** (156 mg, 1 mmol, 1 equiv.), catalyst [Cp\**Ru*(PhCl)]BF<sub>4</sub> (43 mg, 0.1 mmol, 0.1 equiv.), boronic acid **3i** (213 mg, 1.4 mmol, 1.4 equiv.), KF (17 mg, 0.3 mmol, 0.3 equiv.), DABCO (135 mg, 1.2 mmol, 1.2 equiv.), ZrN (420 mg, 4 mmol, 4 equiv.), and 0.3 mL of 1,4-dioxane. The purification was accomplished by column chromatography on silica gel to provide the desired product **2k** (204 mg, 0.83 mmol, 83%).

Alternatively the title compound was prepared starting from phenol **1k** (156 mg, 1 mmol, 1 equiv.), catalyst [Cp\**Ru*(PhCl)]BF<sub>4</sub> (43 mg, 0.1 mmol, 0.1 equiv.), aryl trialkoxysilanes **4d** (319 mg, 1.4 mmol, 1.4 equiv.), CsF (46 mg, 0.3 mmol, 0.3 equiv.), DABCO (135 mg, 1.2 mmol, 1.2 equiv.), ZrN (420 mg, 4 mmol, 4 equiv.),

and 0.3 mL of 1,4-dioxane. The purification was accomplished by column chromatography on silica gel to provide the desired product **2k** (197 mg, 0.80 mmol, 80%).

White liquid.  $^1\text{H NMR}$  (500 MHz,  $\text{DMSO-}d_6$ ):  $\delta$  = 3.81 (s, 3H, OMe), 7.04 (d, 2H,  $^3J$  = 8.6 Hz,  $\text{CH}_{\text{Ar}}$ ), 7.58 (d, 1H,  $^3J$  = 8.6 Hz,  $\text{CH}_{\text{Ar}}$ ), 7.69 (d, 2H,  $^3J$  = 8.6 Hz,  $\text{CH}_{\text{Ar}}$ ), 7.75 (d, 1H,  $^3J$  = 10.6 Hz,  $\text{CH}_{\text{Ar}}$ ), 7.99 (s, 1H,  $\text{CH}_{\text{Ar}}$ ), 13.37 (s, 1H, OH).

$^{13}\text{C}\{^1\text{H}\}$  NMR (126 MHz,  $\text{DMSO-}d_6$ ):  $\delta$  = 55.2, 113.8 5 (d,  $J_{\text{CF}}$  = 22.0 Hz), 114.5, 117.2 (d,  $J_{\text{CF}}$  = 22.0 Hz), 122.7, 128.1, 130.2, 133.6 (d,  $J_{\text{CF}}$  = 7.8 Hz), 142.6 (d,  $J_{\text{CF}}$  = 7.8 Hz), 160.0, 162.5 (d,  $^1J_{\text{CF}}$  = 243.9 Hz), 166.2.

Anal. calcd. for  $\text{C}_{14}\text{H}_{11}\text{FO}_3$ : C, 68.29; H, 4.50. Found: C, 68.21; H, 4.39.

#### **4'-methyl-[1,1'-biphenyl]-2-carbonitrile 2l**

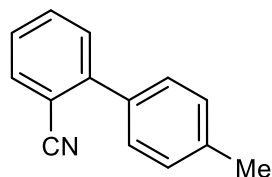

The title compound was prepared starting from phenol **1l** (119 mg, 1 mmol, 1 equiv.), catalyst  $[\text{Cp}^*\text{Ru}(\text{Napht})]\text{BF}_4$  (44 mg, 0.1 mmol, 0.1 equiv.), boronic acid **3j** (190 mg, 1.4 mmol, 1.4 equiv.), KF (17 mg, 0.3 mmol, 0.3 equiv.), DABCO (135 mg, 1.2 mmol, 1.2 equiv.), ZrN (420 mg, 4 mmol, 4 equiv.), and 0.3 mL of 1,4-dioxane. The purification was accomplished by column chromatography on silica gel to provide the desired product **2l** (158 mg, 0.82 mmol, 82%).

Alternatively the title compound was prepared starting from phenol **1l** (119 mg, 1 mmol, 1 equiv.), catalyst  $[\text{Cp}^*\text{Ru}(\text{PhCl})]\text{BF}_4$  (43 mg, 0.1 mmol, 0.1 equiv.), aryl trialkoxysilanes **4e** (297 mg, 1.4 mmol, 1.4 equiv.), CsF (46 mg, 0.3 mmol, 0.3 equiv.), DABCO (135 mg, 1.2 mmol, 1.2 equiv.), ZrN (420 mg, 4 mmol, 4 equiv.), and 0.3 mL of 1,4-dioxane. The purification was accomplished by column chromatography on silica gel to provide the desired product **2l** (162 mg, 0.84 mmol, 84%).

Alternatively the title compound was prepared starting from phenol **1f** (108 mg, 1 mmol, 1 equiv.), catalyst  $[\text{Cp}^*\text{Ru}(\text{PhCl})]\text{BF}_4$  (43 mg, 0.1 mmol, 0.1 equiv.), boronic acid **3k** (206 mg, 1.4 mmol, 1.4 equiv.), KF (17 mg, 0.3 mmol, 0.3 equiv.), DABCO (135 mg, 1.2 mmol, 1.2 equiv.), ZrN (420 mg, 4 mmol, 4 equiv.), and

0.3 mL of 1,4-dioxane. The purification was accomplished by column chromatography on silica gel to provide the desired product **2l** (154 mg, 0.80 mmol, 80%).

Beige solid, mp 50 - 52 °C.  $^1\text{H NMR}$  (500 MHz,  $\text{CDCl}_3$ ):  $\delta$  = 2.43 (s, 3H, Me), 7.30 (d, 2H,  $^3J$  = 8.1 Hz,  $\text{CH}_{\text{Ar}}$ ), 7.42 (t, 1H,  $^3J$  = 7.4 Hz,  $\text{CH}_{\text{Ar}}$ ), 7.47 (d, 2H,  $^3J$  = 8.1 Hz,  $\text{CH}_{\text{Ar}}$ ), 7.51 (d, 1H,  $^3J$  = 8.1 Hz,  $\text{CH}_{\text{Ar}}$ ), 7.61 – 7.65 (m, 1H,  $\text{CH}_{\text{Ar}}$ ), 7.75 (d, 1H,  $^3J$  = 7.7 Hz,  $\text{CH}_{\text{Ar}}$ ).

$^{13}\text{C}\{^1\text{H}\}$  NMR (126 MHz,  $\text{CDCl}_3$ ):  $\delta$  = 21.2, 111.2, 118.8, 127.2, 128.6, 129.4, 129.9, 132.7, 133.7, 135.2, 138.6, 145.5.

MS (GC, 70eV):  $m/z$  (%) = 193 ( $\text{M}^+$ , 100), 165 (28).

Anal. calcd. for  $\text{C}_{14}\text{H}_{11}\text{N}$ : C, 87.01; H, 5.74; N, 7.25. Found: C, 87.16; H, 5.69; N, 7.15.

### **(3'-fluoro-[1,1'-biphenyl]-3-yl)methanol 2m**

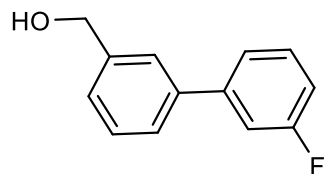

The title compound was prepared starting from phenol **1m** (124 mg, 1 mmol, 1 equiv.), catalyst  $[\text{Cp}^*\text{Ru}(\text{PhCl})]\text{BF}_4$  (43 mg, 0.1 mmol, 0.1 equiv.), boronic acid **3l** (196 mg, 1.4 mmol, 1.4 equiv.), KF (17 mg, 0.3 mmol, 0.3 equiv.), DABCO (135 mg, 1.2 mmol, 1.2 equiv.), ZrN (420 mg, 4 mmol, 4 equiv.), and 0.3 mL of 1,4-dioxane. The purification was accomplished by column chromatography on silica gel to provide the desired product **2m** (178 mg, 0.88 mmol, 88%).

The gram scale synthesis was performed on 10 mmol of the starting **1m** and **2m** was prepared in 78% yield (1.57 g, 7.8 mmol).

Alternatively the title compound was prepared starting from phenol **1m** (124 mg, 1 mmol, 1 equiv.), catalyst  $[\text{Cp}^*\text{Ru}(\text{PhCl})]\text{BF}_4$  (43 mg, 0.1 mmol, 0.1 equiv.), aryl trialkoxysilanes **4f** (302 mg, 1.4 mmol, 1.4 equiv.), CsF (46 mg, 0.3 mmol, 0.3 equiv.), DABCO (135 mg, 1.2 mmol, 1.2 equiv.), ZrN (420 mg, 4 mmol, 4 equiv.), and 0.3 mL of 1,4-dioxane. The purification was accomplished by column chromatography on silica gel to provide the desired product **2m** (174 mg, 0.86 mmol, 86%).

Brown liquid.  $^1\text{H NMR}$  (500 MHz,  $\text{CDCl}_3$ ):  $\delta$  = 1.88 (s, 1H, OH), 4.75 (d, 2H,  $^4J$  = 4.1 Hz,  $\text{CH}_2$ ), 7.02 – 7.07 (m, 3H,  $\text{CH}_{\text{Ar}}$ ), 7.72 – 7.80 (m, 2H,  $\text{CH}_{\text{Ar}}$ ), 7.28 – 7.31 (m, 1H,  $\text{CH}_{\text{Ar}}$ ), 7.36 – 7.40 (m, 2H,  $\text{CH}_{\text{Ar}}$ ), 7.41 – 7.46 (m, 2H,  $\text{CH}_{\text{Ar}}$ ), 7.50 – 7.51 (m, 1H,  $\text{CH}_{\text{Ar}}$ ), 7.58 (s, 1H,  $\text{CH}_{\text{Ar}}$ ).

$^{13}\text{C}\{^1\text{H}\}$  NMR (126 MHz,  $\text{CDCl}_3$ ):  $\delta$  = 65.2, 113.9 (d,  $J_{\text{CF}} = 13.5$  Hz), 114.1 (d,  $J_{\text{CF}} = 12.3$  Hz), 122.7 (d,  $J_{\text{CF}} = 12.8$  Hz), 125.7, 126.4, 129.1, 130.1 (d,  $J_{\text{CF}} = 8.1$  Hz), 140.2, 141.5, 143.2 (d,  $J_{\text{CF}} = 7.9$  Hz), 163.2 (d,  $^1J_{\text{CF}} = 246.9$  Hz).

MS (GC, 70eV):  $m/z$  (%) = 202 ( $\text{M}^+$ , 100), 183 (29), 173 (24), 152 (31) 107 (13).

Anal. calcd. for  $\text{C}_{13}\text{H}_{11}\text{NO}$ : C, 77.21; H, 5.48. Found: C, 77.32; H, 5.39.

### **[1,1'-biphenyl]-4,4'-diyl dimethanol 2n**

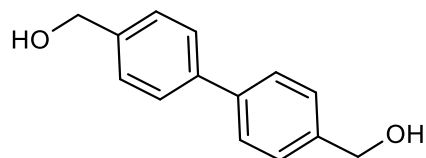

The title compound was prepared starting from phenol **1n** (124 mg, 1 mmol, 1 equiv.), catalyst  $[\text{Cp}^*\text{Ru}(\text{PhCl})]\text{BF}_4$  (43 mg, 0.1 mmol, 0.1 equiv.), boronic acid **3m** (213 mg, 1.4 mmol, 1.4 equiv.), KF (17 mg, 0.3 mmol, 0.3 equiv.), DABCO (135 mg, 1.2 mmol, 1.2 equiv.), ZrN (420 mg, 4 mmol, 4 equiv.), and 0.3 mL of 1,4-dioxane. The purification was accomplished by column chromatography on silica gel to provide the desired product **2n** (175 mg, 0.82 mmol, 82%).

Yellowish solid, mp 194 - 195 °C.  $^1\text{H}$  NMR (500 MHz,  $\text{DMSO}-d_6$ ):  $\delta$  = 4.55 (br. s, 4H,  $2 \times \text{CH}_2$ ), 5.26 (br. s, 2H,  $2 \times \text{OH}$ ), 7.40 (d, 4H,  $^3J = 7.9$  Hz,  $\text{CH}_{\text{Ar}}$ ), 7.61 (d, 4H,  $^3J = 7.9$  Hz,  $\text{CH}_{\text{Ar}}$ ).

$^{13}\text{C}\{^1\text{H}\}$  NMR (126 MHz,  $\text{DMSO}-d_6$ ):  $\delta$  = 62.7, 126.3, 127.1, 138.5, 141.6.

MS (GC, 70eV):  $m/z$  (%) = 214 ( $\text{M}^+$ , 100), 183 (21), 165 (29), 155 (75) 152 (22).

Anal. calcd. for  $\text{C}_{14}\text{H}_{14}\text{O}_2$ : C, 78.48; H, 6.59. Found: C, 78.51; H, 6.63.

### **4-methoxy-1,1'-biphenyl 2o**

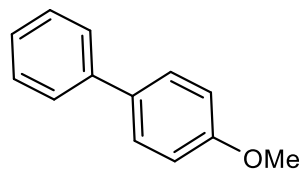

The title compound was prepared starting from phenol **1o** (124 mg, 1 mmol, 1 equiv.), catalyst [Cp\*Ru(PhCl)]BF<sub>4</sub> (43 mg, 0.1 mmol, 0.1 equiv.), boronic acid **3a** (171 mg, 1.4 mmol, 1.4 equiv.), KF (17 mg, 0.3 mmol, 0.3 equiv.), DABCO (135 mg, 1.2 mmol, 1.2 equiv.), ZrN (420 mg, 4 mmol, 4 equiv.), and 0.3 mL of 1,4-dioxane. The purification was accomplished by column chromatography on silica gel to provide the desired product **2o** (143 mg, 0.78 mmol, 78%).

Alternatively the title compound was prepared starting from phenol **1o** (124 mg, 1 mmol, 1 equiv.), catalyst [Cp\*Ru(PhCl)]BF<sub>4</sub> (43 mg, 0.1 mmol, 0.1 equiv.), aryl trialkoxysilanes **4a** (277 mg, 1.4 mmol, 1.4 equiv.), CsF (46 mg, 0.3 mmol, 0.3 equiv.), DABCO (135 mg, 1.2 mmol, 1.2 equiv.), ZrN (420 mg, 4 mmol, 4 equiv.), and 0.3 mL of 1,4-dioxane. The purification was accomplished by column chromatography on silica gel to provide the desired product **2o** (136 mg, 0.74 mmol, 74%).

Alternatively the title compound was prepared starting from phenol **1a** (94 mg, 1 mmol, 1 equiv.), catalyst [Cp\*Ru(PhCl)]BF<sub>4</sub> (43 mg, 0.1 mmol, 0.1 equiv.), boronic acid **3i** (213 mg, 1.4 mmol, 1.4 equiv.), KF (17 mg, 0.3 mmol, 0.3 equiv.), DABCO (135 mg, 1.2 mmol, 1.2 equiv.), ZrN (420 mg, 4 mmol, 4 equiv.), and 0.3 mL of 1,4-dioxane. The purification was accomplished by column chromatography on silica gel to provide the desired product **2o** (140 mg, 0.76 mmol, 76%).

The title compound was prepared starting from phenol **1a** (94 mg, 1 mmol, 1 equiv.), catalyst [Cp\*Ru(PhCl)]BF<sub>4</sub> (43 mg, 0.1 mmol, 0.1 equiv.), aryl trialkoxysilanes **4d** (39 mg, 1.4 mmol, 1.4 equiv.), CsF (46 mg, 0.3 mmol, 0.3 equiv.), DABCO (135 mg, 1.2 mmol, 1.2 equiv.), ZrN (420 mg, 4 mmol, 4 equiv.), and 0.3 mL of 1,4-dioxane. The purification was accomplished by column chromatography on silica gel to provide the desired product **2o** (132 mg, 0.72 mmol, 72%).

White solid, mp 88 - 89 °C. <sup>1</sup>H NMR (500 MHz, CDCl<sub>3</sub>): δ = 3.88 (s, 3H, OMe), 7.03 (d, 2H, <sup>3</sup>J = 8.7 Hz, CH<sub>Ar</sub>), 7.36 (dt, 1H, <sup>3</sup>J = 7.6 Hz, <sup>4</sup>J = 1.0 Hz, CH<sub>Ar</sub>), 7.47 (t, 2H, <sup>3</sup>J = 7.7 Hz, CH<sub>Ar</sub>), 7.58 – 7.62 (m, 4H, CH<sub>Ar</sub>).

<sup>13</sup>C{<sup>1</sup>H} NMR (126 MHz, CDCl<sub>3</sub>): δ = 55.3, 114.2, 126.6, 128.1, 128.7, 133.7, 140.8, 159.1.

MS (GC, 70eV): m/z (%) = 184 (M<sup>+</sup>, 100), 169 (45), 141 (46), 115 (75).

Anal. calcd. for C<sub>13</sub>H<sub>12</sub>O: C, 84.75; H, 6.57. Found: C, 84.66; H, 6.68.

### **1-(4'-bromo-[1,1'-biphenyl]-4-yl)ethan-1-one 2p**

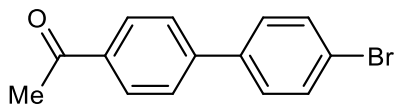

The title compound was prepared starting from phenol **1p** (136 mg, 1 mmol, 1 equiv.), catalyst [Cp\*Ru(PhCl)]BF<sub>4</sub> (43 mg, 0.1 mmol, 0.1 equiv.), boronic acid **3n** (280 mg, 1.4 mmol, 1.4 equiv.), KF (17 mg, 0.3 mmol, 0.3 equiv.), DABCO (135 mg, 1.2 mmol, 1.2 equiv.), ZrN (420 mg, 4 mmol, 4 equiv.), and 0.3 mL of 1,4-dioxane. The purification was accomplished by column chromatography on silica gel to provide the desired product **2p** (220 mg, 0.80 mmol, 80%).

Greenish solid, mp 125 - 126 °C. <sup>1</sup>H NMR (500 MHz, CDCl<sub>3</sub>): δ = 2.63 (s, 3H, Me), 7.48 (dt, 2H, <sup>3</sup>J = 8.6 Hz, <sup>4</sup>J = 2.0 Hz, CH<sub>Ar</sub>), 7.58 (dt, 2H, <sup>3</sup>J = 8.4 Hz, <sup>4</sup>J = 1.8 Hz, CH<sub>Ar</sub>), 7.63 (dt, 2H, <sup>3</sup>J = 8.3 Hz, <sup>4</sup>J = 1.6 Hz, CH<sub>Ar</sub>), 8.02 (dt, 2H, <sup>3</sup>J = 8.3 Hz, <sup>4</sup>J = 1.6 Hz, CH<sub>Ar</sub>).

<sup>13</sup>C{<sup>1</sup>H} NMR (126 MHz, CDCl<sub>3</sub>): δ = 26.6, 122.6, 127.0, 128.8, 129.0, 132.1, 136.1, 138.7, 144.5, 197.5.

MS (GC, 70eV): m/z (%) = 276 (M<sup>+</sup>, 41), 274 (42), 260 (80), 152 (100).

Anal. calcd. for C<sub>12</sub>H<sub>9</sub>NO<sub>2</sub>: C, 72.35; H, 4.55; N, 7.03. Found: C, 72.49; H, 4.39; N, 7.11.

#### ***N*-benzyl-[1,1'-biphenyl]-4-carboxamide **2q****

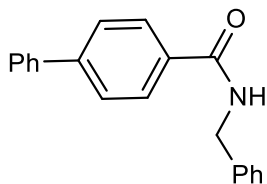

The title compound was prepared starting from phenol **1q** (227 mg, 1 mmol, 1 equiv.), catalyst [Cp\*Ru(PhCl)]BF<sub>4</sub> (43 mg, 0.1 mmol, 0.1 equiv.), boronic acid **3a** (171 mg, 1.4 mmol, 1.4 equiv.), KF (17 mg, 0.3 mmol, 0.3 equiv.), DABCO (135 mg, 1.2 mmol, 1.2 equiv.), ZrN (420 mg, 4 mmol, 4 equiv.), and 0.3 mL of 1,4-dioxane. The purification was accomplished by column chromatography on silica gel to provide the desired product **2q** (244 mg, 0.85 mmol, 85%).

The gram scale synthesis was performed on 10 mmol of the starting **1q** and **2q** was prepared in 80% yield (2.30 g, 8.0 mmol).

Alternatively the title compound was prepared starting from phenol **1q** (227 mg, 1 mmol, 1 equiv.), catalyst [Cp\*Ru(PhCl)]BF<sub>4</sub> (43 mg, 0.1 mmol, 0.1 equiv.), aryl trialkoxysilanes **4a** (277 mg, 1.4 mmol, 1.4 equiv.), CsF (46 mg, 0.3 mmol, 0.3 equiv.), DABCO (135 mg, 1.2 mmol, 1.2 equiv.), ZrN (420 mg, 4 mmol, 4 equiv.),

and 0.3 mL of 1,4-dioxane. The purification was accomplished by column chromatography on silica gel to provide the desired product **2q** (241 mg, 0.84 mmol, 84%). The gram scale synthesis was performed on 10 mmol of the starting **1q** and **2q** was prepared in 81% yield (2.32 g, 8.1 mmol).

White solid, mp 181 - 182 °C.  $^1\text{H NMR}$  (500 MHz,  $\text{DMSO-}d_6$ ):  $\delta$  = 4.49 (d, 2H,  $^3J$  = 6.0 Hz,  $\text{CH}_2$ ), 7.19 – 7.22 (m, 1H,  $\text{CH}_{\text{Ar}}$ ), 7.28 – 7.32 (m, 4H,  $\text{CH}_{\text{Ar}}$ ), 7.35 – 7.38 (m, 1H,  $\text{CH}_{\text{Ar}}$ ), 7.45 (t, 2H,  $^3J$  = 7.1 Hz  $\text{CH}_{\text{Ar}}$ ), 7.69 (d, 2H,  $^3J$  = 7.3 Hz  $\text{CH}_{\text{Ar}}$ ), 7.75 (d, 2H,  $^3J$  = 8.6 Hz,  $\text{CH}_{\text{Ar}}$ ), 7.75 (d, 2H,  $^3J$  = 8.3 Hz,  $\text{CH}_{\text{Ar}}$ ), 9.11 (t, 1H,  $^3J$  = 7.0 Hz, NH).

$^{13}\text{C}\{^1\text{H}\}$  NMR (126 MHz,  $\text{DMSO-}d_6$ ):  $\delta$  = 42.6, 126.6, 126.7, 126.9, 127.2, 127.9, 128.0, 128.3, 129.0, 133.1, 139.2, 139.7, 142.8.

MS (GC, 70eV):  $m/z$  (%) = 287 ( $\text{M}^+$ , 21), 181 (100), 152 (51).

Anal. calcd. for  $\text{C}_{20}\text{H}_{17}\text{NO}$ : C, 83.59; H, 5.96; N, 4.87. Found: C, 83.63; H, 6.03; N, 4.71.

### **[1,1'-biphenyl]-4-yl(azepan-1-yl)methanone 2r**

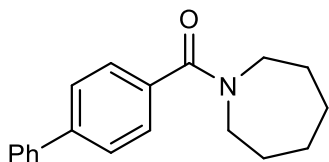

The title compound was prepared starting from phenol **1r** (219 mg, 1 mmol, 1 equiv.), catalyst  $[\text{Cp}^*\text{Ru}(\text{PhCl})]\text{BF}_4$  (43 mg, 0.1 mmol, 0.1 equiv.), boronic acid **3a** (171 mg, 1.4 mmol, 1.4 equiv.), KF (17 mg, 0.3 mmol, 0.3 equiv.), DABCO (135 mg, 1.2 mmol, 1.2 equiv.), ZrN (420 mg, 4 mmol, 4 equiv.), and 0.3 mL of 1,4-dioxane. The purification was accomplished by column chromatography on silica gel to provide the desired product **2r** (223 mg, 0.80 mmol, 80%).

Yellowish solid, mp 87 - 88 °C.  $^1\text{H NMR}$  (500 MHz,  $\text{CDCl}_3$ ):  $\delta$  = 1.60 – 1.64 (m, 6H,  $\text{CH}_2$ ), 1.84 – 1.85 (m, 2H,  $\text{CH}_2$ ), 3.42 (t, 2H,  $^3J$  = 5.8 Hz,  $\text{CH}_2$ ), 3.69 (t, 2H,  $^3J$  = 5.8 Hz,  $\text{CH}_2$ ), 7.35 (t, 1H,  $^3J$  = 7.3 Hz,  $\text{CH}_{\text{Ar}}$ ), 7.42 – 7.46 (m, 4H,  $\text{CH}_{\text{Ar}}$ ), 7.60 (t, 4H,  $^3J$  = 9.6 Hz  $\text{CH}_{\text{Ar}}$ ).

$^{13}\text{C}\{^1\text{H}\}$  NMR (126 MHz,  $\text{CDCl}_3$ ):  $\delta$  = 26.3, 27.1, 27.7, 29.4, 46.2, 49.6, 126.8, 126.9, 127.0, 127.5, 128.7, 136.0, 140.2, 141.8, 171.3.

MS (GC, 70eV):  $m/z$  (%) = 279 ( $\text{M}^+$ , 88), 181 (100), 152 (46).

Anal. calcd. for  $\text{C}_{19}\text{H}_{21}\text{NO}$ : C, 81.68; H, 7.58; N, 5.01. Found: C, 81.73; H, 7.59; N, 5.03.

### **2-([1,1'-biphenyl]-4-ylmethyl)-1H-benzo[d]imidazole 2s**

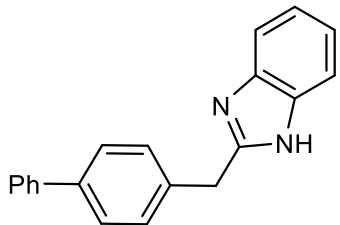

The title compound was prepared starting from phenol **1s** (224 mg, 1 mmol, 1 equiv.), catalyst [Cp\**Ru*(PhCl)]BF<sub>4</sub> (43 mg, 0.1 mmol, 0.1 equiv.), boronic acid **3a** (171 mg, 1.4 mmol, 1.4 equiv.), KF (17 mg, 0.3 mmol, 0.3 equiv.), DABCO (135 mg, 1.2 mmol, 1.2 equiv.), ZrN (420 mg, 4 mmol, 4 equiv.), and 0.3 mL of 1,4-dioxane. The purification was accomplished by column chromatography on silica gel to provide the desired product **2s** (241 mg, 0.85 mmol, 85%).

Alternatively the title compound was prepared starting from phenol **1s** (224 mg, 1 mmol, 1 equiv.), catalyst [Cp\**Ru*(PhCl)]BF<sub>4</sub> (43 mg, 0.1 mmol, 0.1 equiv.), aryl trialkoxysilanes **4a** (277 mg, 1.4 mmol, 1.4 equiv.), CsF (46 mg, 0.3 mmol, 0.3 equiv.), DABCO (135 mg, 1.2 mmol, 1.2 equiv.), ZrN (420 mg, 4 mmol, 4 equiv.), and 0.3 mL of 1,4-dioxane. The purification was accomplished by column chromatography on silica gel to provide the desired product **2s** (244 mg, 0.86 mmol, 86%).

White solid, mp 189 - 191 °C. <sup>1</sup>H NMR (500 MHz, DMSO-*d*<sub>6</sub>): δ = 4.21 (s, 2H, CH<sub>2</sub>), 7.11 – 7.13 (m, 2H, CH<sub>Ar</sub>), 7.32 (t, 1H, <sup>3</sup>*J* = 7.3 Hz CH<sub>Ar</sub>), 7.41 – 7.46 (m, 6H, CH<sub>Ar</sub>), 7.60 – 7.64 (m, 4H, CH<sub>Ar</sub>), 12.33 (br. s, 1H, NH).

<sup>13</sup>C{<sup>1</sup>H} NMR (126 MHz, DMSO-*d*<sub>6</sub>): δ = 34.8, 121.3, 126.5, 126.8, 127.4, 129.0, 129.4, 136.9, 138.5, 140.0, 153.5.

MS (GC, 70eV): *m/z* (%) = 284 (M<sup>+</sup>, 100), 165 (22), 152 (46).

Anal. calcd. for C<sub>20</sub>H<sub>16</sub>N<sub>2</sub>: C, 84.48; H, 5.67; N, 9.85. Found: C, 84.31; H, 5.59; N, 10.1.

***tert*-butyl (*R*)-(1-([1,1'-biphenyl]-4-yl)-3-hydroxypropan-2-yl)carbamate **2t****

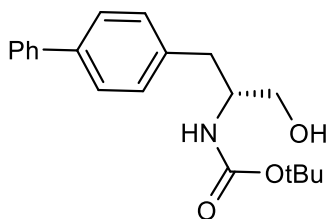



The title compound was prepared starting from phenol **1t** (267 mg, 1 mmol, 1 equiv.), [Cp\**Ru*(PhCl)]BF<sub>4</sub> (43 mg, 0.1 mmol, 0.1 equiv.), boronic acid **3a** (171 mg, 1.4 mmol, 1.4 equiv.), KF (17 mg, 0.3 mmol, 0.3 equiv.), DABCO (135 mg, 1.2 mmol, 1.2 equiv.), ZrN (420 mg, 4 mmol, 4 equiv.), and 0.3 mL of 1,4-dioxane. The purification was accomplished by column chromatography on silica gel to provide the desired product **2t** (261 mg, 0.80 mmol, 80%).

Alternatively the title compound was prepared starting from phenol **1t** (267 mg, 1 mmol, 1 equiv.), catalyst [Cp\**Ru*(PhCl)]BF<sub>4</sub> (43 mg, 0.1 mmol, 0.1 equiv.), aryl trialkoxysilanes **4a** (277 mg, 1.4 mmol, 1.4 equiv.), CsF (46 mg, 0.3 mmol, 0.3 equiv.), DABCO (135 mg, 1.2 mmol, 1.2 equiv.), ZrN (420 mg, 4 mmol, 4 equiv.), and 0.3 mL of 1,4-dioxane. The purification was accomplished by column chromatography on silica gel to provide the desired product **2t** (268 mg, 0.82 mmol, 82%).

White solid, mp 154 - 156 °C. <sup>1</sup>H NMR (500 MHz, CDCl<sub>3</sub>): δ = 1.44 (s, 9H, *t*Bu), 2.91 – 2.92 (m, 2H, CH<sub>2</sub>), 3.15 – 3.16 (m, 1H, CH), 3.60 – 3.62 (m, 1H, CH<sub>2</sub>), 3.69 – 3.71 (m, 1H, CH<sub>2</sub>), 3.95 (br. s, 1H, NH), 5.01 (br. s, 1H, OH), 7.31 – 7.37 (m, 3H, CH<sub>Ar</sub>), 7.44 (t, 2H, <sup>3</sup>J = 7.8 Hz, CH<sub>Ar</sub>), 7.54 (d, 2H, <sup>3</sup>J = 7.8 Hz, CH<sub>Ar</sub>), 7.59 (d, 2H, <sup>3</sup>J = 7.4 Hz, CH<sub>Ar</sub>).

<sup>13</sup>C{<sup>1</sup>H} NMR (126 MHz, CDCl<sub>3</sub>): δ = 28.3, 37.0, 53.6, 63.9, 79.6, 126.9, 127.1, 128.7, 129.7, 137.0, 139.3, 140.8., 156.1.

Anal. calcd. for C<sub>20</sub>H<sub>25</sub>NO<sub>3</sub>: C, 73.37; H, 7.70; N, 4.28. Found: C, 73.41; H, 7.72; N, 4.21.

#### 4'-((1*s*,4*r*)-4-pentylcyclohexyl)-[1,1'-biphenyl]-4-carbonitrile **5u**

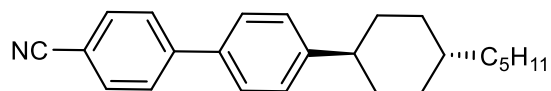

The title compound was prepared starting from phenol **1u** (246 mg, 1 mmol, 1 equiv.), catalyst [Cp\**Ru*(PhCl)]BF<sub>4</sub> (43 mg, 0.1 mmol, 0.1 equiv.), boronic acid **3o** (206 mg, 1.4 mmol, 1.4 equiv.), KF (17 mg, 0.3 mmol, 0.3 equiv.), DABCO (135 mg, 1.2 mmol, 1.2 equiv.), ZrN (420 mg, 4 mmol, 4 equiv.), and 0.3 mL of 1,4-dioxane. The purification was accomplished by column chromatography on silica gel to provide the desired product **2u** (241 mg, 0.76 mmol, 76%).

White solid, mp 95 - 96 °C. <sup>1</sup>H NMR (500 MHz, CDCl<sub>3</sub>): δ = 0.93 (t, 3H, <sup>3</sup>J = 7.4 Hz, CH<sub>3</sub>), 1.05 – 1.14 (m, 2H, Aliph.), 1.23 – 1.38 (m, 9H, Aliph.), 1.46 – 1.55 (m, 2H, Aliph.), 1.93 (t, 4H, <sup>3</sup>J = 12.6 Hz, Aliph.), 2.51 – 2.57 (m, 1H, Aliph.), 7.33 (d, 2H, <sup>3</sup>J = 8.5 Hz, CH<sub>Ar</sub>), 7.53 (d, 2H, <sup>3</sup>J = 8.5 Hz, CH<sub>Ar</sub>), 7.66 – 7.71 (m, 4H, CH<sub>Ar</sub>).

<sup>13</sup>C{<sup>1</sup>H} NMR (126 MHz, CDCl<sub>3</sub>): δ = 14.1, 22.7, 26.6, 32.2, 33.5, 34.2, 37.2, 37.3, 44.3, 110.4, 118.9, 127.0, 127.4, 127.5, 132.5, 136.5, 145.5, 148.6.

Anal. calcd. for C<sub>24</sub>H<sub>29</sub>N: C, 86.96; H, 8.82; N, 4.23. Found: C, 87.03; H, 8.69; N, 4.28.

### 2-phenyl-1H-indole 2v

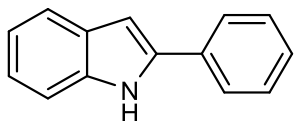

The title compound was prepared starting from phenol **1v** (133 mg, 1 mmol, 1 equiv.), catalyst [Cp\**Ru*(PhCl)]BF<sub>4</sub> (43 mg, 0.1 mmol, 0.1 equiv.), boronic acid **3a** (171 mg, 1.4 mmol, 1.4 equiv.), KF (17 mg, 0.3 mmol, 0.3 equiv.), DABCO (135 mg, 1.2 mmol, 1.2 equiv.), ZrN (420 mg, 4 mmol, 4 equiv.), and 0.3 mL of 1,4-dioxane. The purification was accomplished by column chromatography on silica gel to provide the desired product **2v** (162 mg, 0.84 mmol, 84%).

Alternatively the title compound was prepared starting from phenol **1v** (133 mg, 1 mmol, 1 equiv.), catalyst [Cp\**Ru*(PhCl)]BF<sub>4</sub> (43 mg, 0.1 mmol, 0.1 equiv.), aryl trialkoxysilanes **4a** (277 mg, 1.4 mmol, 1.4 equiv.), CsF (46 mg, 0.3 mmol, 0.3 equiv.), DABCO (135 mg, 1.2 mmol, 1.2 equiv.), ZrN (420 mg, 4 mmol, 4 equiv.), and 0.3 mL of 1,4-dioxane. The purification was accomplished by column chromatography on silica gel to provide the desired product **2v** (154 mg, 0.80 mmol, 80%).

White solid, mp 188 - 189 °C. <sup>1</sup>H NMR (500 MHz, DMSO-*d*<sub>6</sub>): δ = 6.90 (d, 1H, <sup>4</sup>*J* = 1.3 Hz, CH<sub>Ar</sub>), 7.02 (dt, 1H, <sup>3</sup>*J* = 7.9 Hz, <sup>4</sup>*J* = 0.9 Hz, CH<sub>Ar</sub>), 7.12 (dt, 1H, <sup>3</sup>*J* = 6.9 Hz, <sup>4</sup>*J* = 1.3 Hz, CH<sub>Ar</sub>), 7.31 (t, 1H, <sup>3</sup>*J* = 7.3 Hz CH<sub>Ar</sub>), 7.44 – 7.47 (m, 3H, CH<sub>Ar</sub>), 7.54 (d, 1H, <sup>3</sup>*J* = 7.9 Hz, CH<sub>Ar</sub>), 7.88 (dd, 2H, <sup>3</sup>*J* = 7.9 Hz, <sup>4</sup>*J* = 1.3 Hz, CH<sub>Ar</sub>), 11.58 (s, 1H, NH).

<sup>13</sup>C{<sup>1</sup>H} NMR (126 MHz, DMSO-*d*<sub>6</sub>): δ = 98.7, 111.4, 119.4, 120.1, 121.6, 125.0, 127.4, 128.7, 128.9, 132.3, 137.2, 137.6.

MS (GC, 70eV): *m/z* (%) = 193 (M<sup>+</sup>, 100), 165 (25).

Anal. calcd. for C<sub>14</sub>H<sub>11</sub>N: C, 87.01; H, 5.74; N, 7.25. Found: C, 87.13; H, 5.79; N, 7.08.

### 3-([1,1'-biphenyl]-4-carbonyl)-4H-chromen-4-one 2w

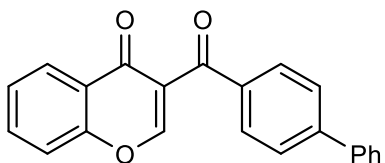

The title compound was prepared starting from phenol **1w** (266 mg, 1 mmol, 1 equiv.), catalyst [Cp\*Ru(PhCl)]BF<sub>4</sub> (43 mg, 0.1 mmol, 0.1 equiv.), boronic acid **3a** (171 mg, 1.4 mmol, 1.4 equiv.), KF (17 mg, 0.3 mmol, 0.3 equiv.), DABCO (135 mg, 1.2 mmol, 1.2 equiv.), ZrN (420 mg, 4 mmol, 4 equiv.), and 0.3 mL of 1,4-dioxane. The purification was accomplished by column chromatography on silica gel to provide the desired product **2w** (261 mg, 0.80 mmol, 80%). Alternatively the title compound was prepared starting from phenol **1w** (266 mg, 1 mmol, 1 equiv.), catalyst [Cp\*Ru(PhCl)]BF<sub>4</sub> (43 mg, 0.1 mmol, 0.1 equiv.), aryl trialkoxysilanes **4a** (277 mg, 1.4 mmol, 1.4 equiv.), CsF (46 mg, 0.3 mmol, 0.3 equiv.), DABCO (135 mg, 1.2 mmol, 1.2 equiv.), ZrN (420 mg, 4 mmol, 4 equiv.), and 0.3 mL of 1,4-dioxane. The purification was accomplished by column chromatography on silica gel to provide the desired product **2w** (244 mg, 0.75 mmol, 75%).

Yellow solid, mp 179 - 181 °C. <sup>1</sup>H NMR (500 MHz, CDCl<sub>3</sub>): δ = 7.38 – 7.41 (m, 1H, CH<sub>Ar</sub>), 7.45 – 7.51 (m, 3H, CH<sub>Ar</sub>), 7.55 (d, 1H, <sup>3</sup>J = 8.6 Hz, CH<sub>Ar</sub>), 7.62 – 7.64 (m, 2H, CH<sub>Ar</sub>), 7.68 (d, 2H, <sup>3</sup>J = 8.3 Hz, CH<sub>Ar</sub>), 7.74 – 7.77 (m, 1H, CH<sub>Ar</sub>), 7.94 (d, 2H, <sup>3</sup>J = 8.1 Hz, CH<sub>Ar</sub>), 8.28 (dd, 1H, <sup>3</sup>J = 7.8 Hz, <sup>4</sup>J = 1.6 Hz, CH<sub>Ar</sub>), 8.33 (s, 1H, CH<sub>Ar</sub>).

<sup>13</sup>C{<sup>1</sup>H} NMR (126 MHz, CDCl<sub>3</sub>): δ = 118.3, 125.0, 125.3, 126.1, 126.5, 127.1, 127.3, 128.2, 128.9, 130.2, 134.4, 135.8, 139.9, 146.2, 156.1, 158.6, 174.8, 191.4.

MS (GC, 70eV): m/z (%) = 326 (M<sup>+</sup>, 91), 298 (100), 181 (25), 152 (79), 121 (33).

Anal. calcd. for C<sub>22</sub>H<sub>14</sub>O<sub>3</sub>: C, 80.97; H, 4.32. Found: C, 81.03; H, 4.28.

### **(E)-1,2-diphenylethen 2x**

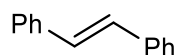

The title compound was prepared starting from phenol **1a** (94 mg, 1 mmol, 1 equiv.), catalyst [Cp\*Ru(PhCl)]BF<sub>4</sub> (43 mg, 0.1 mmol, 0.1 equiv.), boronic acid **3r** (207 mg, 1.4 mmol, 1.4 equiv.), KF (17 mg, 0.3 mmol, 0.3 equiv.), DABCO (135 mg, 1.2 mmol, 1.2 equiv.), ZrN (420 mg, 4 mmol, 4 equiv.), and 0.3 mL of 1,4-dioxane. The purification was accomplished by column chromatography on silica gel to provide the desired product **2x** (92 mg, 0.51 mmol, 51%).

Beige solid, mp 123 - 125 °C. <sup>1</sup>H NMR (500 MHz, CDCl<sub>3</sub>): δ = 7.16 (s, 2H, CH<sub>Ar</sub>), 7.31 (t, 2H, <sup>3</sup>J = 7.5 Hz, CH<sub>Ar</sub>), 7.41 (t, 4H, <sup>3</sup>J = 7.5 Hz, CH<sub>Ar</sub>), 7.56 (d, 4H, <sup>3</sup>J = 7.5 Hz, CH<sub>Ar</sub>).

<sup>13</sup>C{<sup>1</sup>H} NMR (126 MHz, CDCl<sub>3</sub>): δ = 126.5, 127.6, 128.7, 137.3.

Anal. calcd. for C<sub>14</sub>H<sub>12</sub>: C, 93.29; H, 6.71. Found: C, 93.19; H, 6.81.

### 1,2-diphenylethyne **2y**

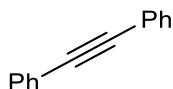

The title compound was prepared starting from phenol **1a** (94 mg, 1 mmol, 1 equiv.), [Cp\*Ru(PhCl)]BF<sub>4</sub> (43 mg, 0.1 mmol, 0.1 equiv.), aryl trialkoxysilanes **4g** (311 mg, 1.4 mmol, 1.4 equiv.), CsF (46 mg, 0.3 mmol, 0.3 equiv.), DABCO (135 mg, 1.2 mmol, 1.2 equiv.), ZrN (420 mg, 4 mmol, 4 equiv.), and 0.3 mL of 1,4-dioxane. The purification was accomplished by column chromatography on silica gel to provide the desired product **2y** (121 mg, 0.68 mmol, 68%).

Yellow solid, mp 60 - 61 °C. <sup>1</sup>H NMR (500 MHz, CDCl<sub>3</sub>): δ = 7.38 – 7.41 (m, 6H, CH<sub>Ar</sub>), 7.60 – 7.62 (m, 4H, CH<sub>Ar</sub>).

<sup>13</sup>C{<sup>1</sup>H} NMR (126 MHz, CDCl<sub>3</sub>): δ = 123.2, 128.2, 128.3, 131.6.

Anal. calcd. for C<sub>14</sub>H<sub>10</sub>: C, 94.34; H, 5.66. Found: C, 94.31; H, 5.69.

### 1-chloro-4-ethynylbenzene **2z**

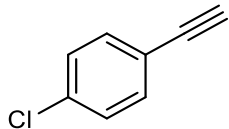

The title compound was prepared starting from phenol **1ae** (128 mg, 1 mmol, 1 equiv.), catalyst [Cp\*Ru(PhCl)]BF<sub>4</sub> (43 mg, 0.1 mmol, 0.1 equiv.), aryl trialkoxysilanes **4h** (204 mg, 1.4 mmol, 1.4 equiv.), CsF (46 mg, 0.3 mmol, 0.3 equiv.), DABCO (135 mg, 1.2 mmol, 1.2 equiv.), ZrN (420 mg, 4 mmol, 4 equiv.), and 0.3 mL of 1,4-dioxane. The purification was accomplished by column chromatography on silica gel to provide the desired product **2z** (84 mg, 0.62 mmol, 62%).

Yellow liquid, mp 60 - 61 °C. <sup>1</sup>H NMR (500 MHz, CDCl<sub>3</sub>): δ = 3.11 (s, 1H, CH), 7.29 – 7.31 (m, 2H, CH<sub>Ar</sub>), 7.41 – 7.43 (m, 2H, CH<sub>Ar</sub>).

<sup>13</sup>C{<sup>1</sup>H} NMR (126 MHz, CDCl<sub>3</sub>): δ = 78.2, 82.5, 120.6, 128.7, 133.3, 134.9.

Anal. calcd. for C<sub>8</sub>H<sub>5</sub>Cl: C, 70.35; H, 3.69. Found: C, 70.42; H, 3.59.

**(4-fluorophenyl)(phenyl)methanone 6a**

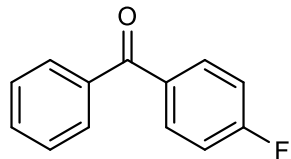

The title compound was prepared starting from phenol **1a** (94 mg, 1 mmol, 1 equiv.), catalyst [Cp\*Ru(Napht)]BF<sub>4</sub> (44 mg, 0.1 mmol, 0.1 equiv.), benzoyltrifluoroborate **5b** (322 mg, 1.4 mmol, 1.4 equiv.), KF (17 mg, 0.3 mmol, 0.3 equiv.), DABCO (135 mg, 1.2 mmol, 1.2 equiv.), ZrN (210 mg, 2 mmol, 2 equiv.), BaTiO<sub>3</sub> (466 mg, 2 mmol, 2 equiv.) and 0.3 mL of 1,4-dioxane. The purification was accomplished by column chromatography on silica gel to provide the desired product **6a** (176 mg, 0.88 mmol, 88%). The gram scale synthesis was performed on 10 mmol of the starting **1a** and **6a** was prepared in 77% yield (1.54 g, 7.7 mmol).

Alternatively the title compound was prepared starting from phenol **1x** (112 mg, 1 mmol, 1 equiv.), catalyst [Cp\*Ru(Napht)]BF<sub>4</sub> (44 mg, 0.1 mmol, 0.1 equiv.), benzoyltrifluoroborate **5a** (297 mg, 1.4 mmol, 1.4 equiv.), KF (17 mg, 0.3 mmol, 0.3 equiv.), DABCO (135 mg, 1.2 mmol, 1.2 equiv.), ZrN (210 mg, 2 mmol, 2 equiv.), BaTiO<sub>3</sub> (466 mg, 2 mmol, 2 equiv.) and 0.3 mL of 1,4-dioxane. The purification was accomplished by column chromatography on silica gel to provide the desired product **6a** (179 mg, 0.89 mmol, 89%).

Beige solid, mp 48 - 50 °C. <sup>1</sup>H NMR (500 MHz, CDCl<sub>3</sub>): δ = 7.16 (tt, 2H, <sup>3</sup>J = 8.7 Hz, <sup>4</sup>J = 1.8 Hz, CH<sub>Ar</sub>), 7.49 (t, 2H, <sup>3</sup>J = 7.6 Hz, CH<sub>Ar</sub>), 7.60 (tt, 1H, <sup>3</sup>J = 7.4 Hz, <sup>4</sup>J = 1.8 Hz, CH<sub>Ar</sub>), 7.76 – 7.80 (m, 2H, CH<sub>Ar</sub>), 7.83 – 7.87 (m, 2H, CH<sub>Ar</sub>).

<sup>13</sup>C{<sup>1</sup>H} NMR (126 MHz, CDCl<sub>3</sub>): δ = 115.4 (d, J<sub>CF</sub> = 21.7 Hz), 128.4, 129.9, 132.5, 132.7 (d, J<sub>CF</sub> = 8.7 Hz), 133.8 (d, J<sub>CF</sub> = 7.8 Hz), 142.6 (d, J<sub>CF</sub> = 2.3 Hz), 137.5, 165.4 (d, <sup>1</sup>J<sub>CF</sub> = 258.4 Hz), 195.2.

MS (GC, 70eV): m/z (%) = 200 (M<sup>+</sup>, 94), 123 (100), 105 (72).

Anal. calcd. for C<sub>13</sub>H<sub>9</sub>FO: C, 77.99; H, 4.53. Found: C, 78.05; H, 4.59.

**(4-fluorophenyl)(4-methoxyphenyl)methanone 6b**

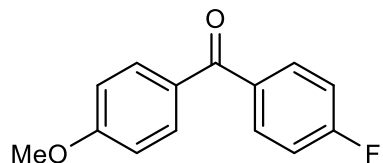

The title compound was prepared starting from phenol **1o** (124 mg, 1 mmol, 1 equiv.), catalyst [Cp\*Ru(Napht)]BF<sub>4</sub> (44 mg, 0.1 mmol, 0.1 equiv.), benzoyltrifluoroborate **5b** (322 mg, 1.4 mmol, 1.4 equiv.), KF (17 mg, 0.3 mmol, 0.3 equiv.), DABCO (135 mg, 1.2 mmol, 1.2 equiv.), ZrN (210 mg, 2 mmol, 2 equiv.), BaTiO<sub>3</sub> (466 mg, 2 mmol, 2 equiv.) and 0.3 mL of 1,4-dioxane. The purification was accomplished by column chromatography on silica gel to provide the desired product **6a** (193 mg, 0.84 mmol, 84%).

White solid, mp 91 - 93 °C. <sup>1</sup>H NMR (500 MHz, DMSO-*d*<sub>6</sub>): δ = 3.84 (s, 3H, OMe), 7.05 (d, 2H, <sup>3</sup>J = 8.7 Hz, CH<sub>Ar</sub>), 7.34 (t, 2H, <sup>3</sup>J = 8.7 Hz, CH<sub>Ar</sub>), 7.72 (dt, 2H, <sup>3</sup>J = 8.7 Hz, <sup>4</sup>J = 1.8 Hz, CH<sub>Ar</sub>), 7.74 – 7.77 (m, 2H, CH<sub>Ar</sub>).

<sup>13</sup>C{<sup>1</sup>H} NMR (126 MHz, CDCl<sub>3</sub>): δ = 55.5, 113.9, 115.4 (d, J<sub>CF</sub> = 25.1 Hz), 129.3, 132.1, 132.2, 134.3 (d, J<sub>CF</sub> = 2.3 Hz), 163.0, 164.4 (d, <sup>1</sup>J<sub>CF</sub> = 252.5 Hz), 193.0.

MS (GC, 70eV): m/z (%) = 230 (M<sup>+</sup>, 53), 135 (100), 123 (20).

Anal. calcd. for C<sub>14</sub>H<sub>11</sub>FO<sub>2</sub>: C, 73.03; H, 4.82. Found: C, 73.19; H, 4.91.

#### ***(4-fluorophenyl)(4-methoxyphenyl)methanone 6c***

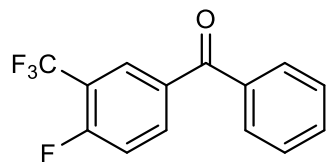

The title compound was prepared starting from phenol **1y** (180 mg, 1 mmol, 1 equiv.), catalyst [Cp\*Ru(Napht)]BF<sub>4</sub> (44 mg, 0.1 mmol, 0.1 equiv.), benzoyltrifluoroborate **5a** (297 mg, 1.4 mmol, 1.4 equiv.), KF (17 mg, 0.3 mmol, 0.3 equiv.), DABCO (135 mg, 1.2 mmol, 1.2 equiv.), ZrN (210 mg, 2 mmol, 2 equiv.), BaTiO<sub>3</sub> (466 mg, 2 mmol, 2 equiv.) and 0.3 mL of 1,4-dioxane. The purification was accomplished by column chromatography on silica gel to provide the desired product **6c** (212 mg, 0.79 mmol, 79%).

White solid, mp 46 - 48 °C.  $^1\text{H NMR}$  (500 MHz,  $\text{CDCl}_3$ ):  $\delta$  = 7.33 (t, 1H,  $^3J$  = 9.1 Hz,  $\text{CH}_{\text{Ar}}$ ), 7.52 (t, 2H,  $^3J$  = 7.6 Hz,  $\text{CH}_{\text{Ar}}$ ), 7.64 (tt, 1H,  $^3J$  = 7.6 Hz,  $^4J$  = 1.3 Hz,  $\text{CH}_{\text{Ar}}$ ), 7.76 – 7.78 (m, 2H,  $\text{CH}_{\text{Ar}}$ ), 8.01 – 8.05 (m, 1H,  $\text{CH}_{\text{Ar}}$ ), 8.11 (dd, 1H,  $^3J$  = 6.7 Hz,  $^4J$  = 1.9 Hz,  $\text{CH}_{\text{Ar}}$ ).

$^{13}\text{C}\{^1\text{H}\}$  NMR (126 MHz,  $\text{CDCl}_3$ ):  $\delta$  = 117.1 (d,  $J_{\text{CF}}$  = 21.6 Hz), 118.8 (dq,  $^2J_{\text{CF}}$  = 33.4 Hz,  $J_{\text{CF}}$  = 13.7 Hz), 122.1 (d,  $^1J_{\text{CF}}$  = 274.1 Hz), 128.7, 129.5 (m), 129.9, 133.1, 133.9 (d,  $J_{\text{CF}}$  = 3.7 Hz), 135.8 (d,  $J_{\text{CF}}$  = 9.9 Hz), 136.6, 162.1 (d,  $^1J_{\text{CF}}$  = 263.9 Hz,  $J_{\text{CF}}$  = 1.9 Hz), 193.9.

MS (GC, 70eV):  $m/z$  (%) = 268 ( $\text{M}^+$ , 56), 191 (55), 163 (36), 105 (100).

Anal. calcd. for  $\text{C}_{14}\text{H}_8\text{F}_4\text{O}$ : C, 62.69; H, 3.01. Found: C, 62.75; H, 3.19.

### *phenyl(3,4,5-trifluorophenyl)methanone 6d*

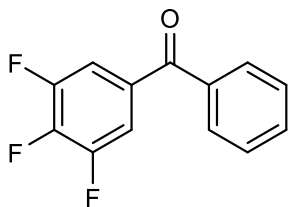

The title compound was prepared starting from phenol **1z** (148 mg, 1 mmol, 1 equiv.), catalyst  $[\text{Cp}^*\text{Ru}(\text{Napht})]\text{BF}_4$  (44 mg, 0.1 mmol, 0.1 equiv.), benzoyltrifluoroborate **5a** (297 mg, 1.4 mmol, 1.4 equiv.), KF (17 mg, 0.3 mmol, 0.3 equiv.), DABCO (135 mg, 1.2 mmol, 1.2 equiv.), ZrN (210 mg, 2 mmol, 2 equiv.),  $\text{BaTiO}_3$  (466 mg, 2 mmol, 2 equiv.) and 0.3 mL of 1,4-dioxane. The purification was accomplished by column chromatography on silica gel to provide the desired product **6d** (193 mg, 0.82 mmol, 82%). The gram scale synthesis was performed on 10 mmol of the starting **1z** and **6d** was prepared in 79% yield (1.86 g, 7.9 mmol).

White solid, mp 78 - 79 °C.  $^1\text{H NMR}$  (500 MHz,  $\text{CDCl}_3$ ):  $\delta$  = 7.46 – 7.49 (m, 2H,  $\text{CH}_{\text{Ar}}$ ), 7.52 (dt, 2H,  $^3J$  = 7.8 Hz,  $^4J$  = 1.5 Hz,  $\text{CH}_{\text{Ar}}$ ), 7.64 (tt, 1H,  $^3J$  = 7.4 Hz,  $^4J$  = 1.3 Hz,  $\text{CH}_{\text{Ar}}$ ), 7.74 – 7.77 (m, 2H,  $\text{CH}_{\text{Ar}}$ ).

$^{13}\text{C}\{^1\text{H}\}$  NMR (126 MHz,  $\text{CDCl}_3$ ):  $\delta$  = 114.5 (dd,  $J_{\text{CF}}$  = 16.0 Hz,  $J_{\text{CF}}$  = 6.5 Hz), 128.6, 129.8, 134.0 (m), 133.1, 136.2, 142.7 (dt,  $^1J_{\text{CF}}$  = 259.3 Hz,  $J_{\text{CF}}$  = 15.4 Hz), 151.0 (ddd,  $^1J_{\text{CF}}$  = 253.1 Hz,  $J_{\text{CF}}$  = 10.4 Hz,  $J_{\text{CF}}$  = 3.2 Hz), 192.9.

MS (GC, 70eV):  $m/z$  (%) = 236 ( $\text{M}^+$ , 63), 159 (34), 105 (100).

Anal. calcd. for C<sub>13</sub>H<sub>7</sub>F<sub>3</sub>O: C, 66.11; H, 2.99. Found: C, 66.29; H, 2.81.

**(2,5-difluorophenyl)(phenyl)methanone 6e**

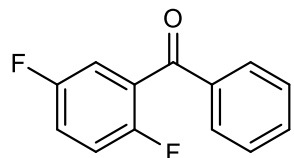

The title compound was prepared starting from phenol **1a** (130 mg, 1 mmol, 1 equiv.), catalyst [Cp\**Ru*(Napht)]BF<sub>4</sub> (44 mg, 0.1 mmol, 0.1 equiv.), benzoyltrifluoroborate **5a** (297 mg, 1.4 mmol, 1.4 equiv.), KF (17 mg, 0.3 mmol, 0.3 equiv.), DABCO (135 mg, 1.2 mmol, 1.2 equiv.), ZrN (210 mg, 2 mmol, 2 equiv.), BaTiO<sub>3</sub> (466 mg, 2 mmol, 2 equiv.) and 0.3 mL of 1,4-dioxane. The purification was accomplished by column chromatography on silica gel to provide the desired product **6e** (174 mg, 0.80 mmol, 80%).

Colourless liquid <sup>1</sup>H NMR (500 MHz, CDCl<sub>3</sub>): δ = 7.12 (dt, 1H, <sup>3</sup>J = 8.9 Hz, <sup>4</sup>J = 4.1 Hz, CH<sub>Ar</sub>), 7.18 – 7.25 (m, 2H, CH<sub>Ar</sub>), 7.47 (t, 2H, <sup>3</sup>J = 7.4 Hz, CH<sub>Ar</sub>), 7.60 (dt, 1H, <sup>3</sup>J = 7.4 Hz, <sup>4</sup>J = 1.1 Hz, CH<sub>Ar</sub>), 7.82 (d, 2H, <sup>3</sup>J = 8.3 Hz, CH<sub>Ar</sub>).

<sup>13</sup>C{<sup>1</sup>H} NMR (126 MHz, CDCl<sub>3</sub>): δ = 116.9 (dd, J<sub>CF</sub> = 25.0 Hz, J<sub>CF</sub> = 3.5 Hz), 117.5 (dd, J<sub>CF</sub> = 25.1 Hz, J<sub>CF</sub> = 8.4 Hz), 119.5 (dd, J<sub>CF</sub> = 24.4 Hz, J<sub>CF</sub> = 8.4 Hz), 127.9 (dd, J<sub>CF</sub> = 17.7 Hz, J<sub>CF</sub> = 6.4 Hz), 128.5, 129.7, 133.7, 136.7, 155.8 (dd, <sup>1</sup>J<sub>CF</sub> = 246.9 Hz, J<sub>CF</sub> = 1.4 Hz), 158.3 (dd, <sup>1</sup>J<sub>CF</sub> = 245.0 Hz, J<sub>CF</sub> = 1.4 Hz), 191.9.

MS (GC, 70eV): m/z (%) = 218 (M<sup>+</sup>, 64), 141 (33), 113 (26), 105 (100).

Anal. calcd. for C<sub>13</sub>H<sub>8</sub>F<sub>2</sub>O: C, 71.56; H, 3.70. Found: C, 71.69; H, 3.79.

**(2,5-dichlorophenyl)(phenyl)methanone 6f**

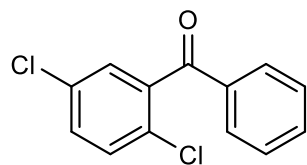



The title compound was prepared starting from phenol **1ab** (163 mg, 1 mmol, 1 equiv.), catalyst [Cp\*Ru(Napht)]BF<sub>4</sub> (44 mg, 0.1 mmol, 0.1 equiv.), benzoyltrifluoroborate **5a** (297 mg, 1.4 mmol, 1.4 equiv.), KF (17 mg, 0.3 mmol, 0.3 equiv.), DABCO (135 mg, 1.2 mmol, 1.2 equiv.), ZrN (210 mg, 2 mmol, 2 equiv.), BaTiO<sub>3</sub> (466 mg, 2 mmol, 2 equiv.) and 0.3 mL of 1,4-dioxane. The purification was accomplished by column chromatography on silica gel to provide the desired product **6f** (226 mg, 0.91 mmol, 91%).

Beige solid, mp 88 - 89 °C. <sup>1</sup>H NMR (500 MHz, DMSO-*d*<sub>6</sub>): δ = 7.56 (t, 2H, <sup>3</sup>J = 7.1 Hz, CH<sub>Ar</sub>), 7.64 – 7.67 (m, 3H, CH<sub>Ar</sub>), 7.70 – 7.76 (m, 3H, CH<sub>Ar</sub>).

<sup>13</sup>C{<sup>1</sup>H} NMR (126 MHz, DMSO-*d*<sub>6</sub>): δ = 128.4, 128.5, 129.1, 129.7, 131.4, 131.5, 132.2, 134.4, 135.3, 139.7, 193.0.

MS (GC, 70eV): m/z (%) = 250 (M<sup>+</sup>, 35), 173 (17), 105 (100).

Anal. calcd. for C<sub>13</sub>H<sub>8</sub>Cl<sub>2</sub>O: C, 62.18; H, 3.21. Found: C, 62.39; H, 3.13.

### ***phenyl(3-(trifluoromethyl)phenyl)methanone 6g***

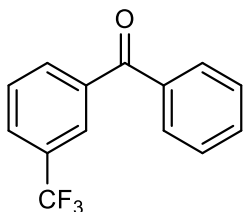

The title compound was prepared starting from phenol **1ac** (162 mg, 1 mmol, 1 equiv.), catalyst [Cp\*Ru(Napht)]BF<sub>4</sub> (44 mg, 0.1 mmol, 0.1 equiv.), benzoyltrifluoroborate **5a** (297 mg, 1.4 mmol, 1.4 equiv.), KF (17 mg, 0.3 mmol, 0.3 equiv.), DABCO (135 mg, 1.2 mmol, 1.2 equiv.), ZrN (210 mg, 2 mmol, 2 equiv.), BaTiO<sub>3</sub> (466 mg, 2 mmol, 2 equiv.) and 0.3 mL of 1,4-dioxane. The purification was accomplished by column chromatography on silica gel to provide the desired product **6g** (222 mg, 0.89 mmol, 89%).

White solid, mp 53 - 54 °C. <sup>1</sup>H NMR (500 MHz, CDCl<sub>3</sub>): δ = 7.51 (t, 2H, <sup>3</sup>J = 7.4 Hz, CH<sub>Ar</sub>), 7.62 (t, 2H, <sup>3</sup>J = 7.4 Hz, CH<sub>Ar</sub>), 7.78 – 7.81 (m, 2H, CH<sub>Ar</sub>), 7.84 (dd, 1H, <sup>3</sup>J = 7.8 Hz, <sup>4</sup>J = 0.6 Hz, CH<sub>Ar</sub>), 7.97 (d, 1H, <sup>3</sup>J = 7.7 Hz, CH<sub>Ar</sub>), 8.07 (s, 1H, CH<sub>Ar</sub>).

<sup>13</sup>C{<sup>1</sup>H} NMR (126 MHz, CDCl<sub>3</sub>): δ = 125.0 (q, <sup>1</sup>J<sub>CF</sub> = 270.0 Hz), 126.6, 128.5, 128.7, 128.9, 130.0, 131.0 (q, <sup>2</sup>J<sub>CF</sub> = 33.0 Hz), 133.0, 136.7, 138.3, 195.1.

Anal. calcd. for C<sub>14</sub>H<sub>9</sub>F<sub>3</sub>O: C, 67.20; H, 3.63. Found: C, 67.39; H, 3.79.

**(3,5-difluorophenyl)(phenyl)methanone 6h**

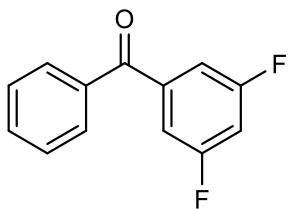

The title compound was prepared starting from phenol **1ad** (130 mg, 1 mmol, 1 equiv.), catalyst [Cp\**Ru*(Napht)]BF<sub>4</sub> (44 mg, 0.1 mmol, 0.1 equiv.), benzoyltrifluoroborate **5a** (297 mg, 1.4 mmol, 1.4 equiv.), KF (17 mg, 0.3 mmol, 0.3 equiv.), DABCO (135 mg, 1.2 mmol, 1.2 equiv.), ZrN (210 mg, 2 mmol, 2 equiv.), BaTiO<sub>3</sub> (466 mg, 2 mmol, 2 equiv.) and 0.3 mL of 1,4-dioxane. The purification was accomplished by column chromatography on silica gel to provide the desired product **6h** (190 mg, 0.87 mmol, 87%).

Yellowish solid, mp 58 - 59 °C. <sup>1</sup>H NMR (500 MHz, CDCl<sub>3</sub>): δ = 7.04 (tt, 1H, <sup>3</sup>J = 8.6 Hz, <sup>4</sup>J = 2.3 Hz, CH<sub>Ar</sub>), 7.30 – 7.32 (m, 2H, CH<sub>Ar</sub>), 7.51 (t, 2H, <sup>3</sup>J = 7.8 Hz, CH<sub>Ar</sub>), 7.63 (tt, 1H, <sup>3</sup>J = 7.4 Hz, <sup>4</sup>J = 1.9 Hz, CH<sub>Ar</sub>), 7.78 – 7.80 (m, 2H, CH<sub>Ar</sub>).

<sup>13</sup>C{<sup>1</sup>H} NMR (126 MHz, CDCl<sub>3</sub>): δ = 107.7 (t, <sup>2</sup>J<sub>CF</sub> = 25.8 Hz), 112.8 (d, J<sub>CF</sub> = 7.7 Hz), 113.0 (d, J<sub>CF</sub> = 7.4 Hz), 128.6, 130.0, 133.1, 136.4, 140.6 (d, J<sub>CF</sub> = 7.8 Hz), 162.7 (dd, <sup>1</sup>J<sub>CF</sub> = 251.3 Hz, <sup>2</sup>J<sub>CF</sub> = 11.4 Hz), 193.9.

MS (GC, 70eV): m/z (%) = 218 (M<sup>+</sup>, 60), 141 (20), 113 (21), 105 (100).

Anal. calcd. for C<sub>13</sub>H<sub>8</sub>F<sub>2</sub>O: C, 71.56; H, 3.70. Found: C, 71.42; H, 3.63.

**(3,4-difluorophenyl)(phenyl)methanone 6i**

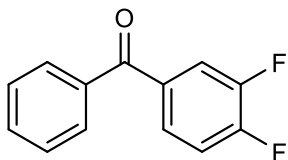

The title compound was prepared starting from phenol **1a** (94 mg, 1 mmol, 1 equiv.), catalyst [Cp\**Ru*(Naph<sub>t</sub>)]BF<sub>4</sub> (44 mg, 0.1 mmol, 0.1 equiv.), benzoyltrifluoroborate **5c** (347 mg, 1.4 mmol, 1.4 equiv.), KF (17 mg, 0.3 mmol, 0.3 equiv.), DABCO (135 mg, 1.2 mmol, 1.2 equiv.), ZrN (210 mg, 2 mmol, 2 equiv.), BaTiO<sub>3</sub> (466 mg, 2 mmol, 2 equiv.) and 0.3 mL of 1,4-dioxane. The purification was accomplished by column chromatography on silica gel to provide the desired product **6h** (185 mg, 0.85 mmol, 85%).

Yellowish solid, mp 54 - 55 °C. <sup>1</sup>H NMR (500 MHz, CDCl<sub>3</sub>): δ = 7.22 – 7.28 (m, 1H, CH<sub>Ar</sub>), 7.48 (t, 2H, <sup>3</sup>J = 7.7 Hz, CH<sub>Ar</sub>), 7.55 – 7.60 (m, 2H, CH<sub>Ar</sub>), 7.64 – 7.69 (m, 1H, CH<sub>Ar</sub>), 7.73 – 7.75 (m, 1H, CH<sub>Ar</sub>).

<sup>13</sup>C{<sup>1</sup>H} NMR (126 MHz, CDCl<sub>3</sub>): δ = 117.2 (t, J<sub>CF</sub> = 17.2 Hz), 119.2 (d, J<sub>CF</sub> = 18.8 Hz), 127.0 (dd, J<sub>CF</sub> = 7.2 Hz, J<sub>CF</sub> = 3.8 Hz), 128.5, 129.8, 132.8, 134.4 (m), 136.9, 150.1 (dd, <sup>1</sup>J<sub>CF</sub> = 250.5 Hz, <sup>2</sup>J<sub>CF</sub> = 14.2 Hz), 153.2 (dd, <sup>1</sup>J<sub>CF</sub> = 257.0 Hz, <sup>2</sup>J<sub>CF</sub> = 11.4 Hz), 194.0.

MS (GC, 70eV): m/z (%) = 218 (M<sup>+</sup>, 83), 141 (61), 113 (34), 105 (100).

Anal. calcd. for C<sub>13</sub>H<sub>8</sub>F<sub>2</sub>O: C, 71.56; H, 3.70. Found: C, 71.69; H, 3.78.

**(C) Copies  $^1\text{H}$  and  $^{13}\text{C}$  NMR spectra**

# Compound 2a

SpinWorks 4: IVA 1965 1H DMSO

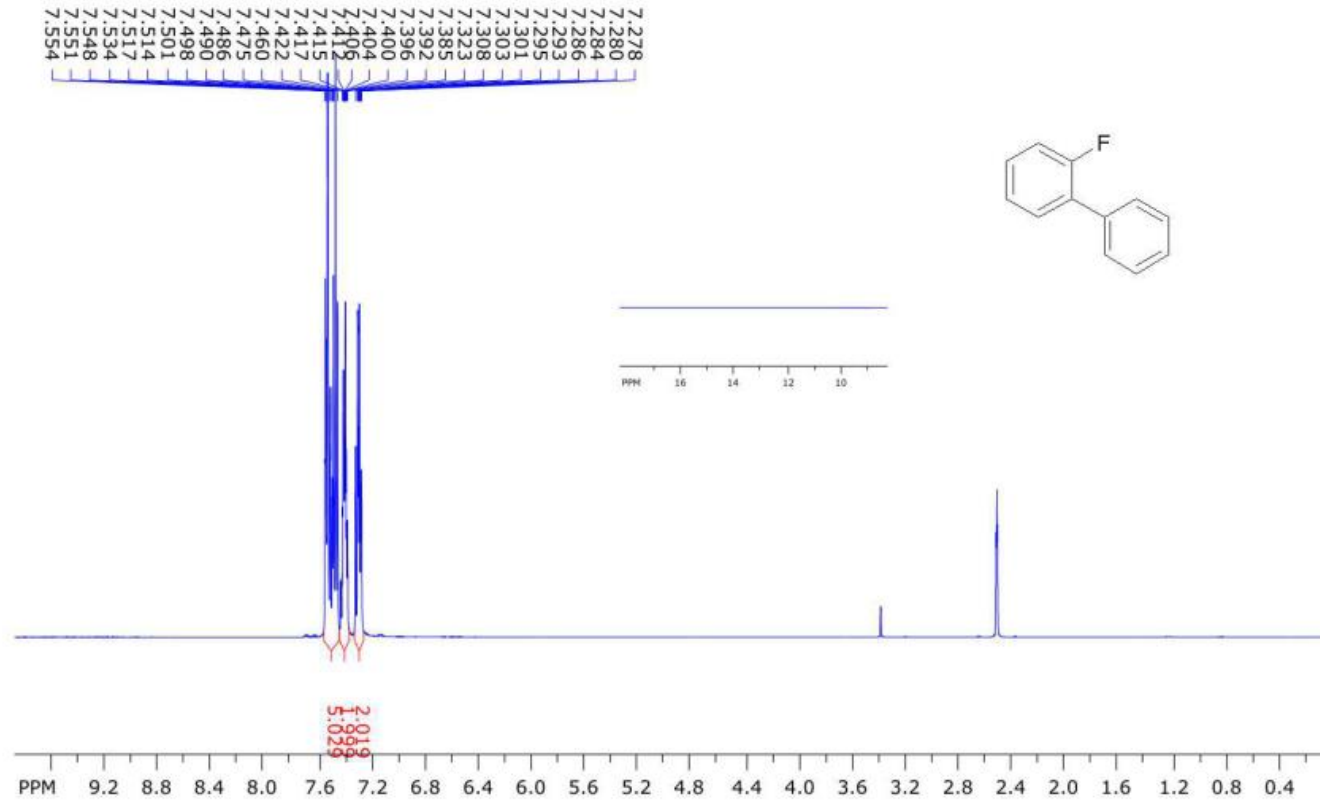

file: D:\NAPO\NMR\500-2\mkr12203\25\fid exp: <zg30>  
transmitter freq.: 500.133001 MHz  
time domain size: 65536 points  
width: 12335.53 Hz = 24.6645 ppm = 0.188225 Hz/pt  
number of scans: 24

freq. of 0 ppm: 500.130005 MHz  
processed size: 65536 complex points  
LB: 0.300 GF: 0.0000  
Hz/cm: 197.587 ppm/cm: 0.39507

# Compound 2a

SpinWorks 4: IVA 1965 13C DSMD

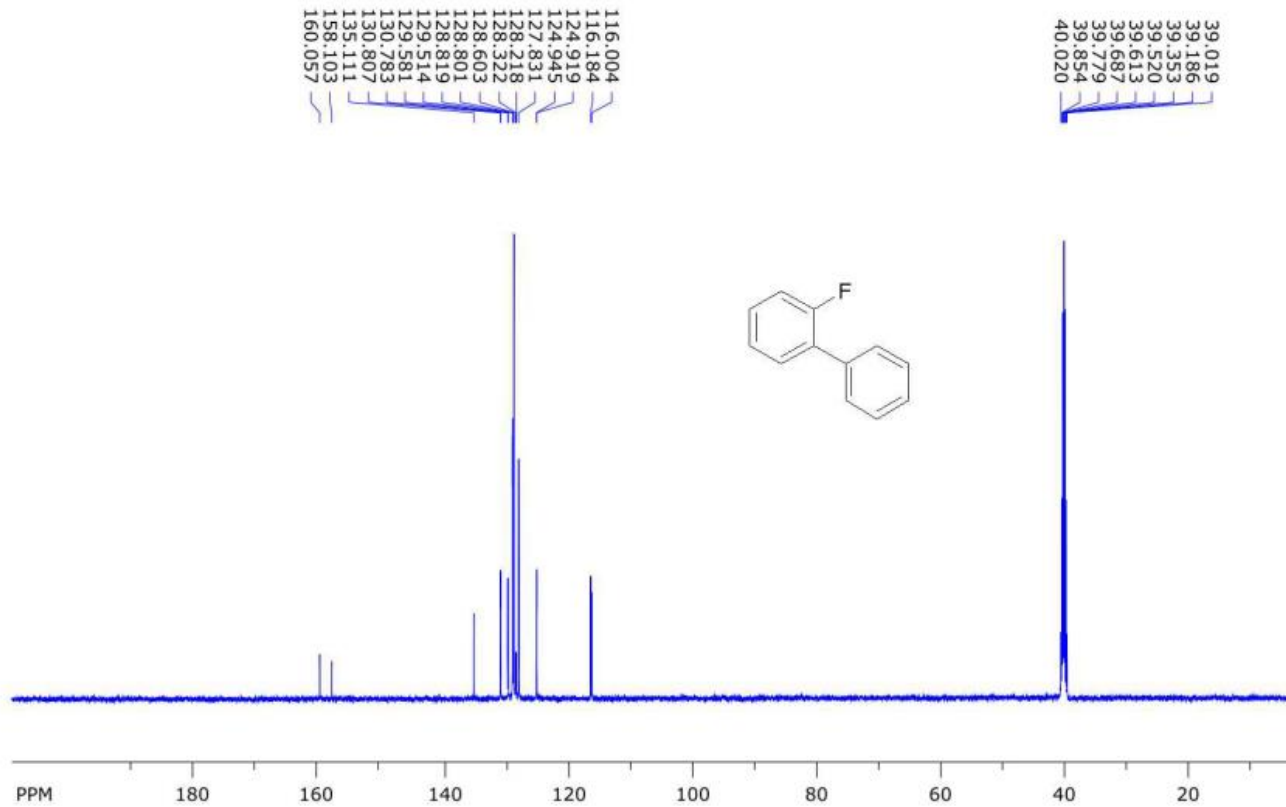

file: D:\NAPO\NMR\500-2\mkr12203\26\fid exp: <zggp30>  
transmitter freq.: 125.772879 MHz  
time domain size: 65536 points  
width: 36057.69 Hz = 286.6889 ppm = 0.550197 Hz/pt  
number of scans: 512

freq. of 0 ppm: 125.757845 MHz  
processed size: 32768 complex points  
LB: 2.000 GF: 0.0000  
Hz/cm: 1046.630 ppm/cm: 8.32159



# Compound 2b

SpinWorks 4: IVA 2716 13C CDCI3

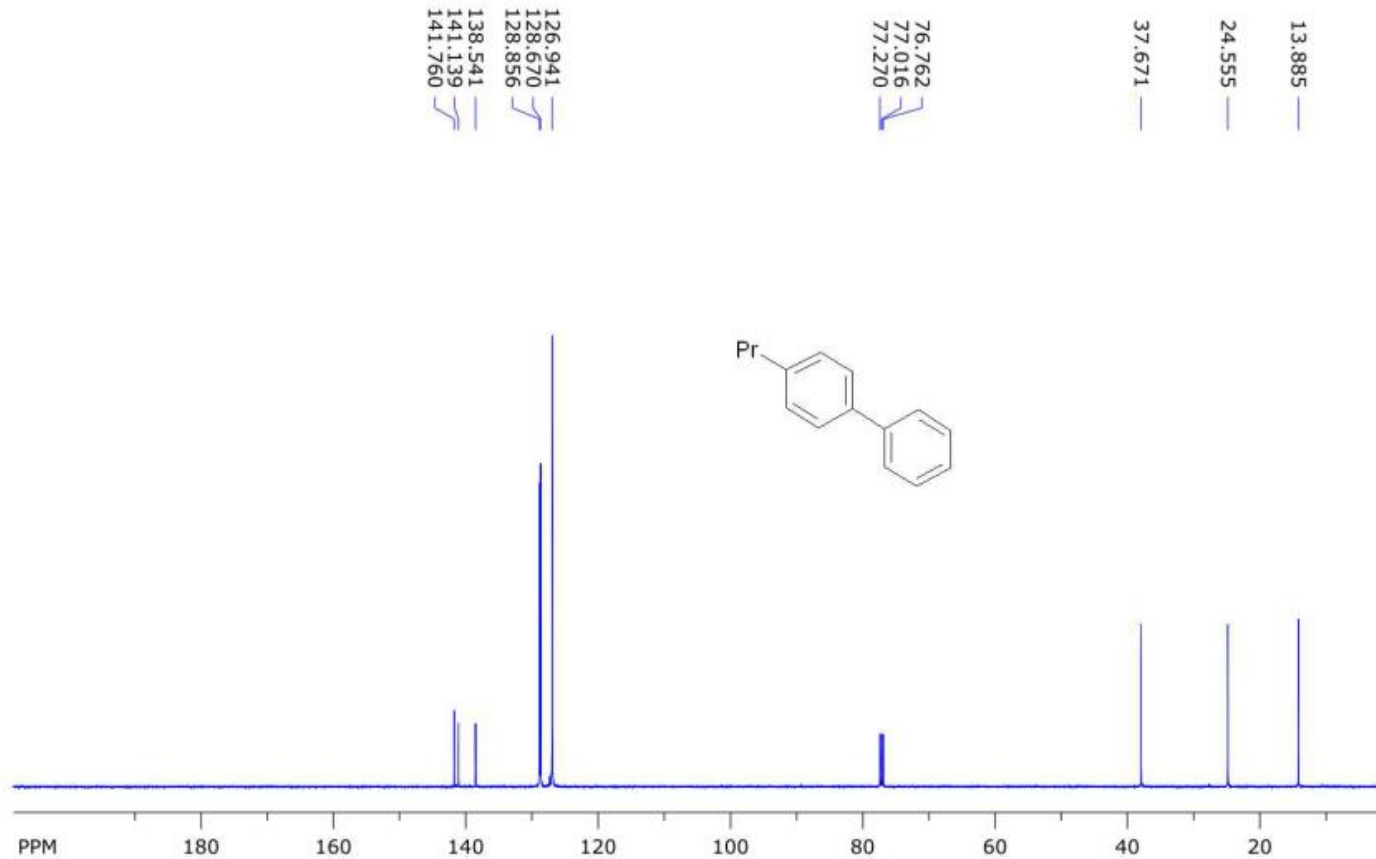

file: D:\NAPO\NMR\500-2\mkr12606\12\fid expt: <zgpg30>  
transmitter freq.: 125.772879 MHz  
time domain size: 65536 points  
width: 36057.69 Hz = 286.6889 ppm = 0.550197 Hz/pt  
number of scans: 512

freq. of 0 ppm: 125.757818 MHz  
processed size: 32768 complex points  
LB: 2.000 GF: 0.0000  
Hz/cm: 1046.630 ppm/cm: 8.32159



# Compound 2c

SpinWorks 4: IVA 1966 1H DMSO

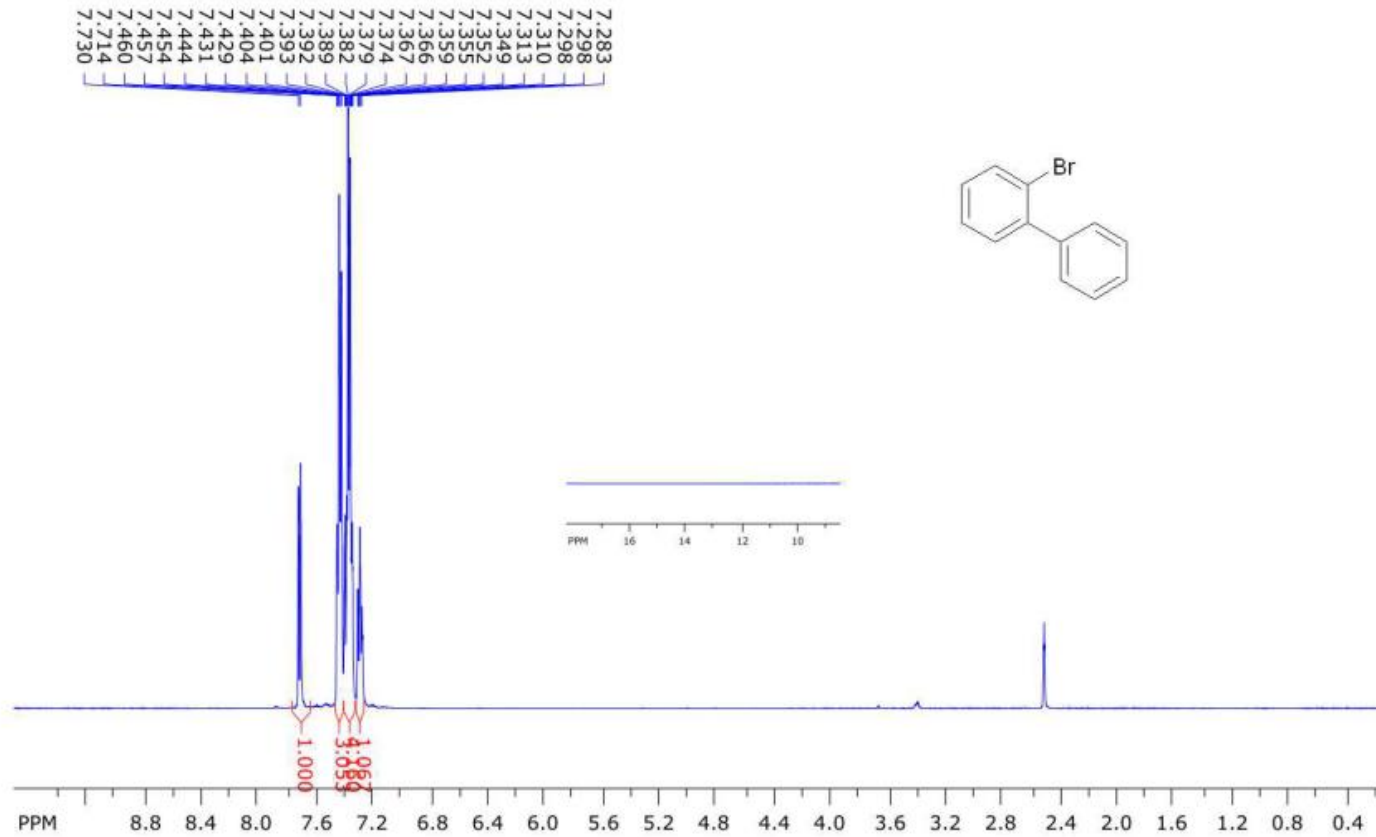

file: D:\NAPO\NMR\500-2\mkr11903\3\fid expt: <zg30>  
transmitter freq.: 500.133001 MHz  
time domain size: 65536 points  
width: 12335.53 Hz = 24.6645 ppm = 0.188225 Hz/pt  
number of scans: 24

freq. of 0 ppm: 500.130005 MHz  
processed size: 65536 complex points  
LB: 0.300 GF: 0.0000  
Hz/cm: 192.674 ppm/cm: 0.38525

# Compound 2c

SpinWorks 4: IVA 1966 13C DMSO

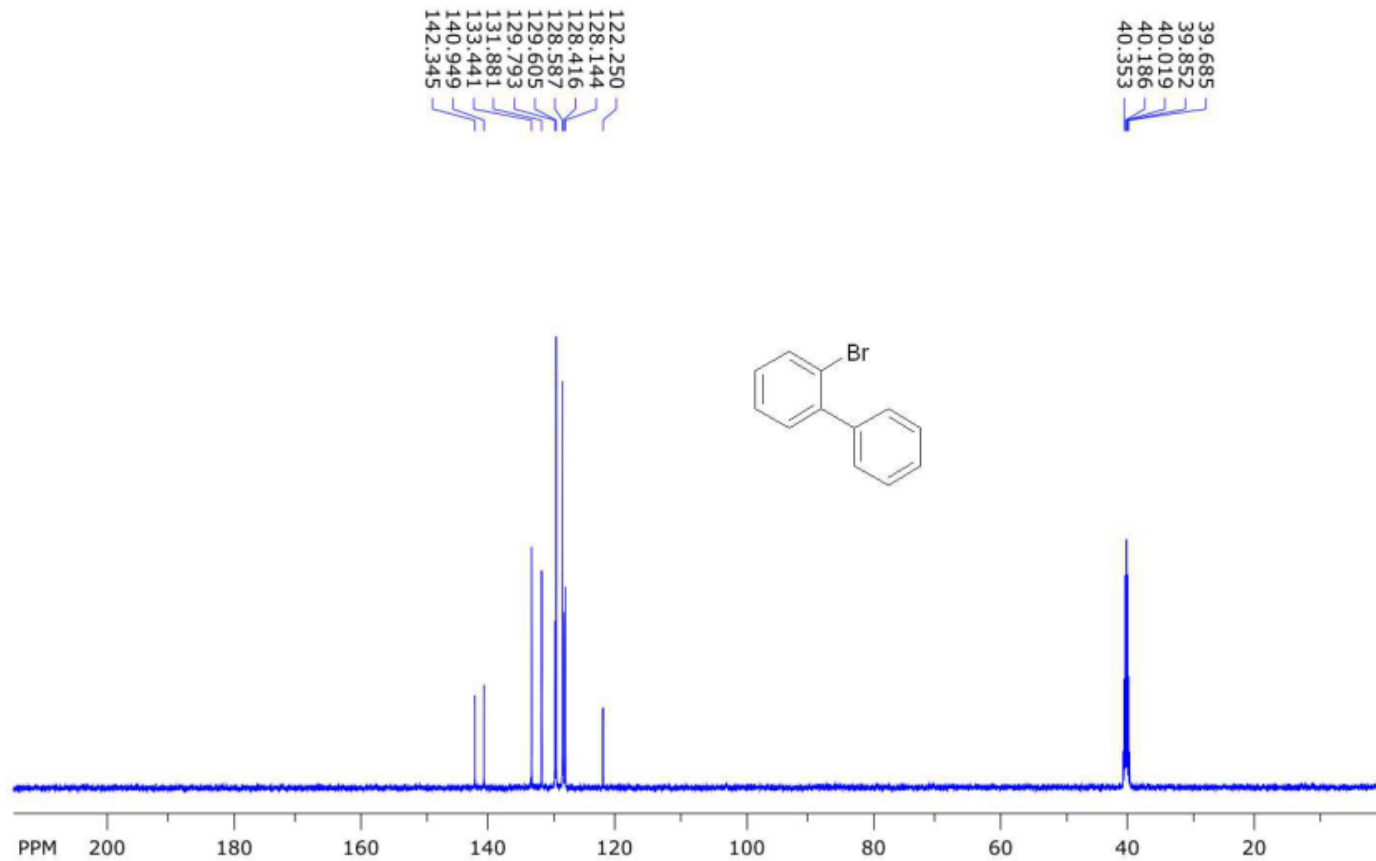

file: D:\NAPO\NMR\500-2\mkr11903\4\fid expt: <zgpg30>  
transmitter freq.: 125.772879 MHz  
time domain size: 65536 points  
width: 36057.69 Hz = 286.6889 ppm = 0.550197 Hz/pt  
number of scans: 128

freq. of 0 ppm: 125.757789 MHz  
processed size: 32768 complex points  
LB: 2.000 GF: 0.0000  
Hz/cm: 1084.922 ppm/cm: 8.62604

# Compound 2d

SpinWorks 4: IVA 2277 1H CDCl3

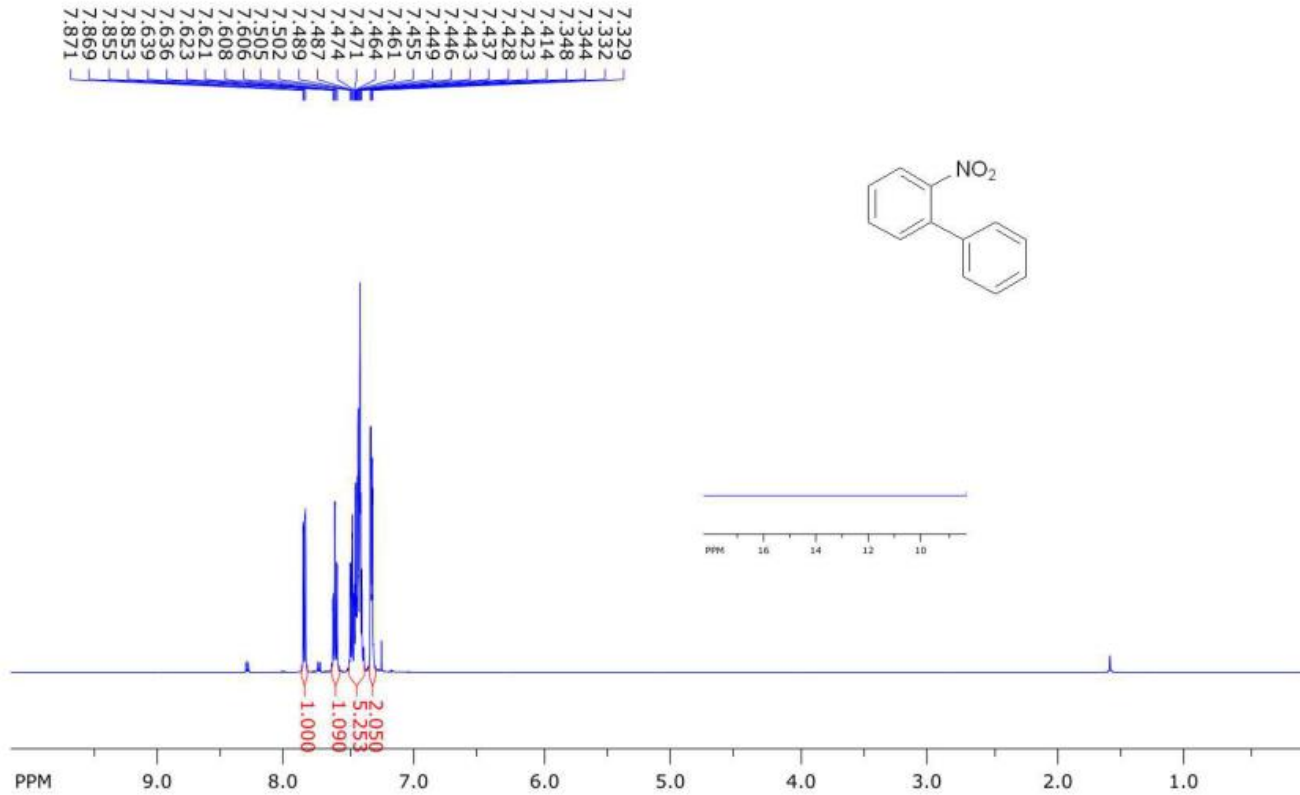

file: D:\NAPO\NMR\500-2\mkr12404\15\fid expt: <zg30>  
transmitter freq.: 500.133001 MHz  
time domain size: 65536 points  
width: 12335.53 Hz = 24.6645 ppm = 0.188225 Hz/pt  
number of scans: 24

freq. of 0 ppm: 500.130023 MHz  
processed size: 65536 complex points  
LB: 0.300 GF: 0.0000  
Hz/cm: 203.591 ppm/cm: 0.40707

# Compound 2d

SpinWorks 4: IVA 2277 13C CDCl3

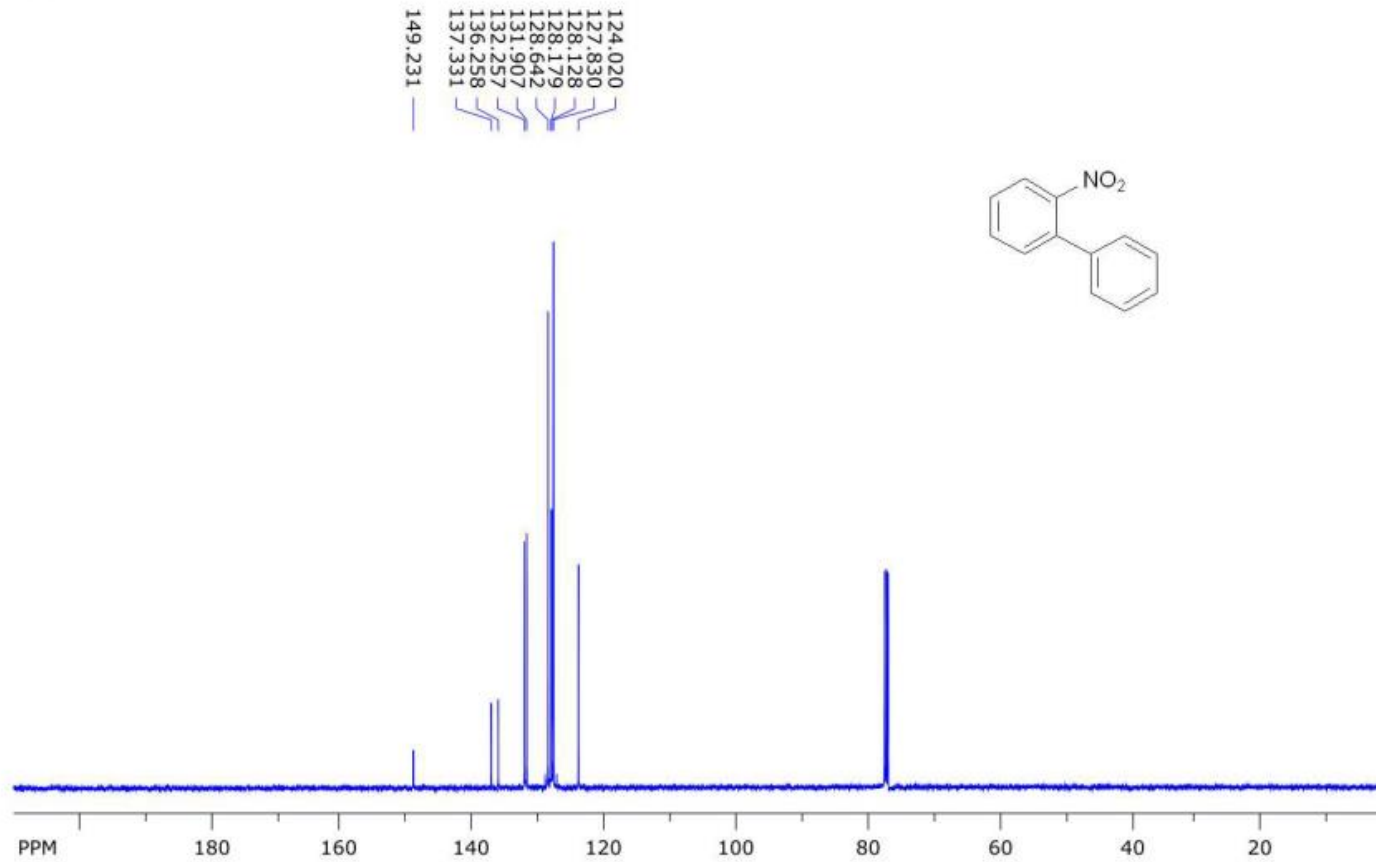

file: D:\NAPO\NMR\500-2\mkr12404\16\fid expt: <zggp30>  
transmitter freq.: 125.772879 MHz  
time domain size: 65536 points  
width: 36057.69 Hz = 286.6889 ppm = 0.550197 Hz/pt  
number of scans: 512

freq. of 0 ppm: 125.757801 MHz  
processed size: 32768 complex points  
LB: 2.000 GF: 0.0000  
Hz/cm: 1054.608 ppm/cm: 8.38502

# Compound 2e

SpinWorks 4: IVA 1954 1H DMSO

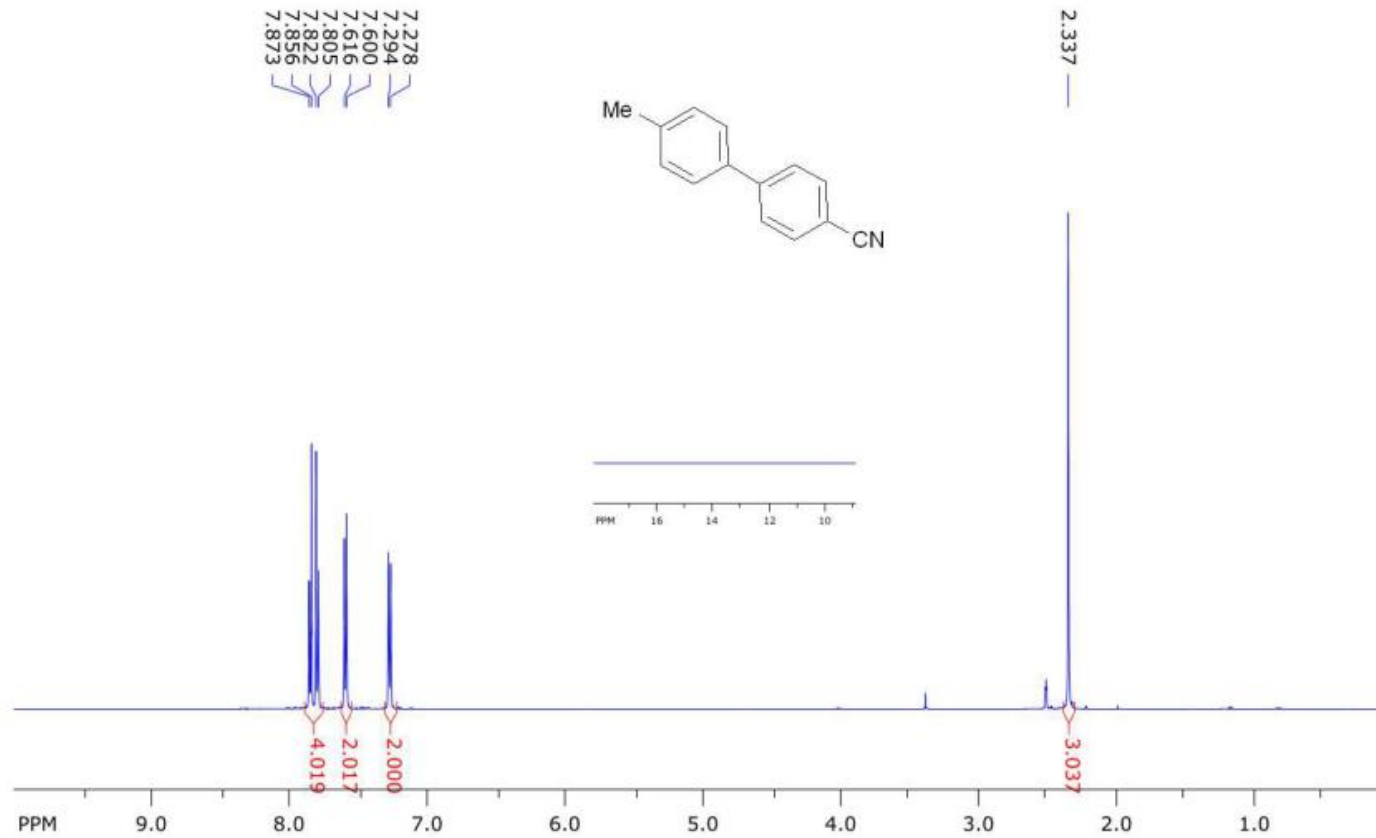

file: D:\NAPO\NMR\500-2\mkr10804\1\fid expt: <zg30>  
transmitter freq.: 500.133001 MHz  
time domain size: 65536 points  
width: 12335.53 Hz = 24.6645 ppm = 0.188225 Hz/pt  
number of scans: 24

freq. of 0 ppm: 500.130005 MHz  
processed size: 65536 complex points  
LB: 0.300 GF: 0.0000  
Hz/cm: 200.316 ppm/cm: 0.40053

# Compound 2e

SpinWorks 4: IVA 1954 13C DMSO

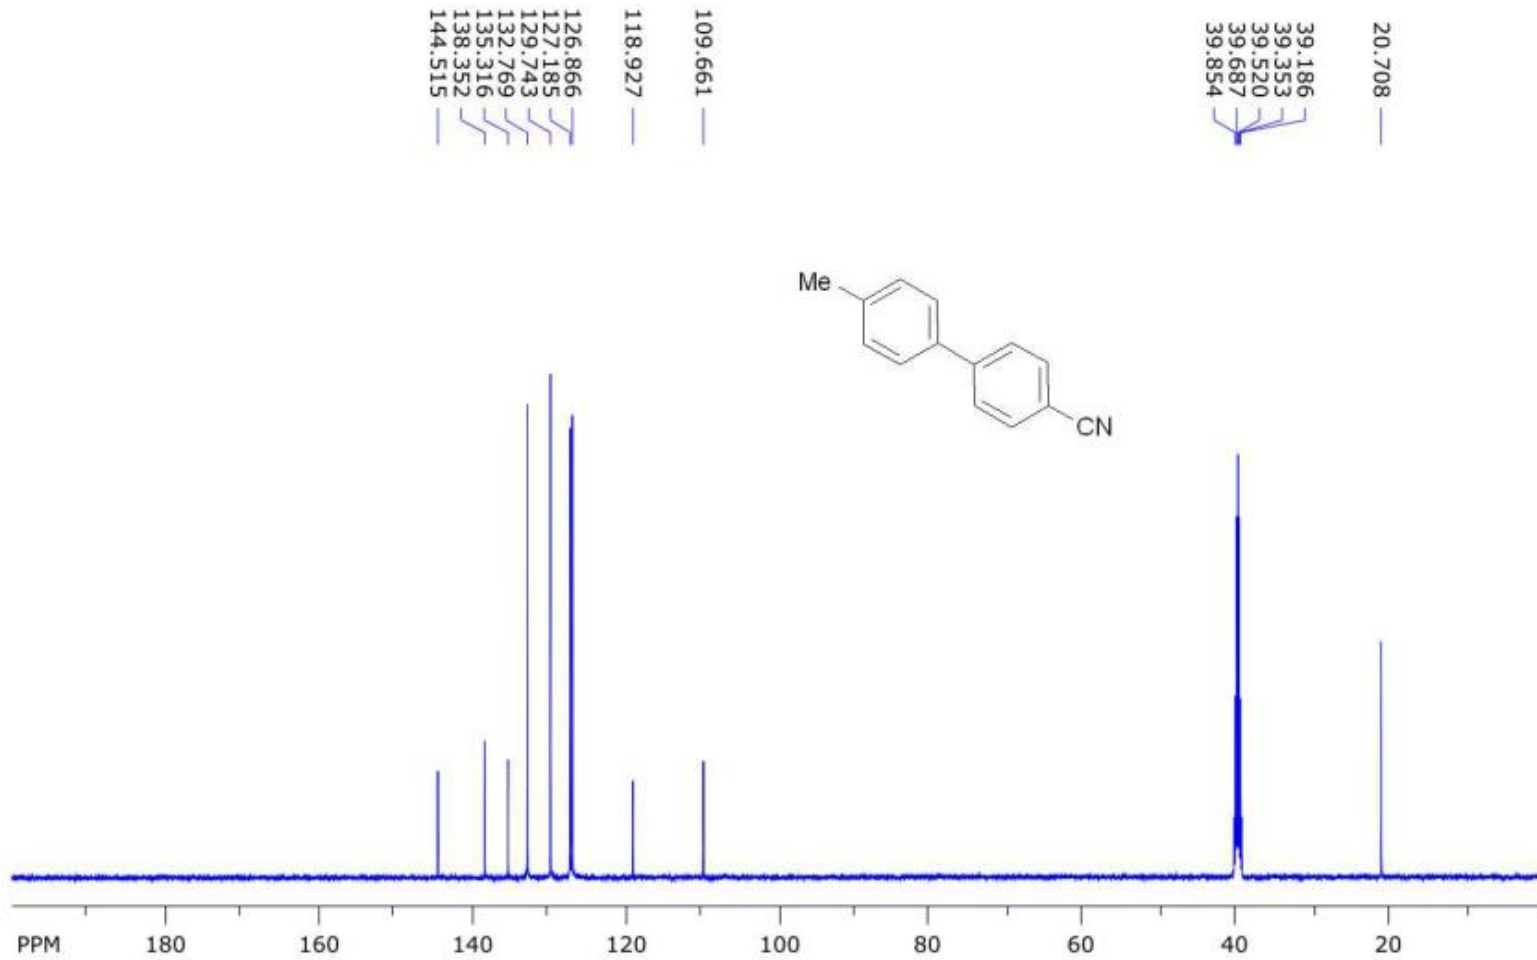

file: D:\NAPO\NMR\500-2\mkr10804\2\fid expt: <zpgg30>  
transmitter freq.: 125.772879 MHz  
time domain size: 65536 points  
width: 36057.69 Hz = 286.6889 ppm = 0.550197 Hz/pt  
number of scans: 512

freq. of 0 ppm: 125.757846 MHz  
processed size: 32768 complex points  
LB: 2.000 GF: 0.0000  
Hz/cm: 1009.934 ppm/cm: 8.02983

# Compound 2f

SpinWorks 4: IVA 1549 1H DMSO

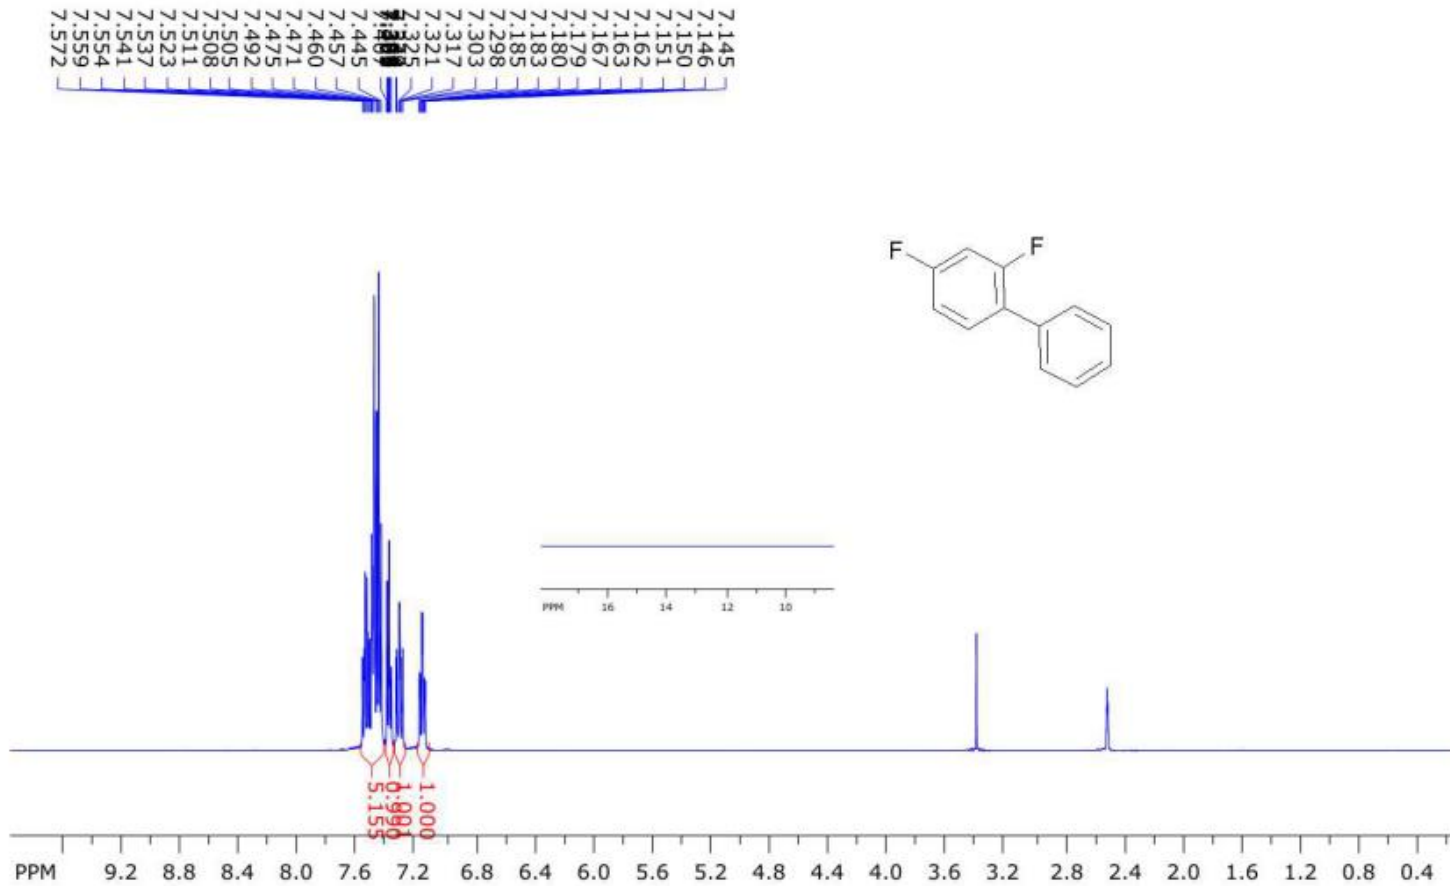

file: D:\NAPO\NMR\500-2\mkr11705\5\fid expt: <zg30>  
transmitter freq.: 500.133001 MHz  
time domain size: 65536 points  
width: 12335.53 Hz = 24.6645 ppm = 0.188225 Hz/pt  
number of scans: 24

freq. of 0 ppm: 500.130005 MHz  
processed size: 65536 complex points  
LB: 0.300 GF: 0.0000  
Hz/cm: 198.133 ppm/cm: 0.39616

# Compound 2f

SpinWorks 4: IVA 1549 13C DMSO

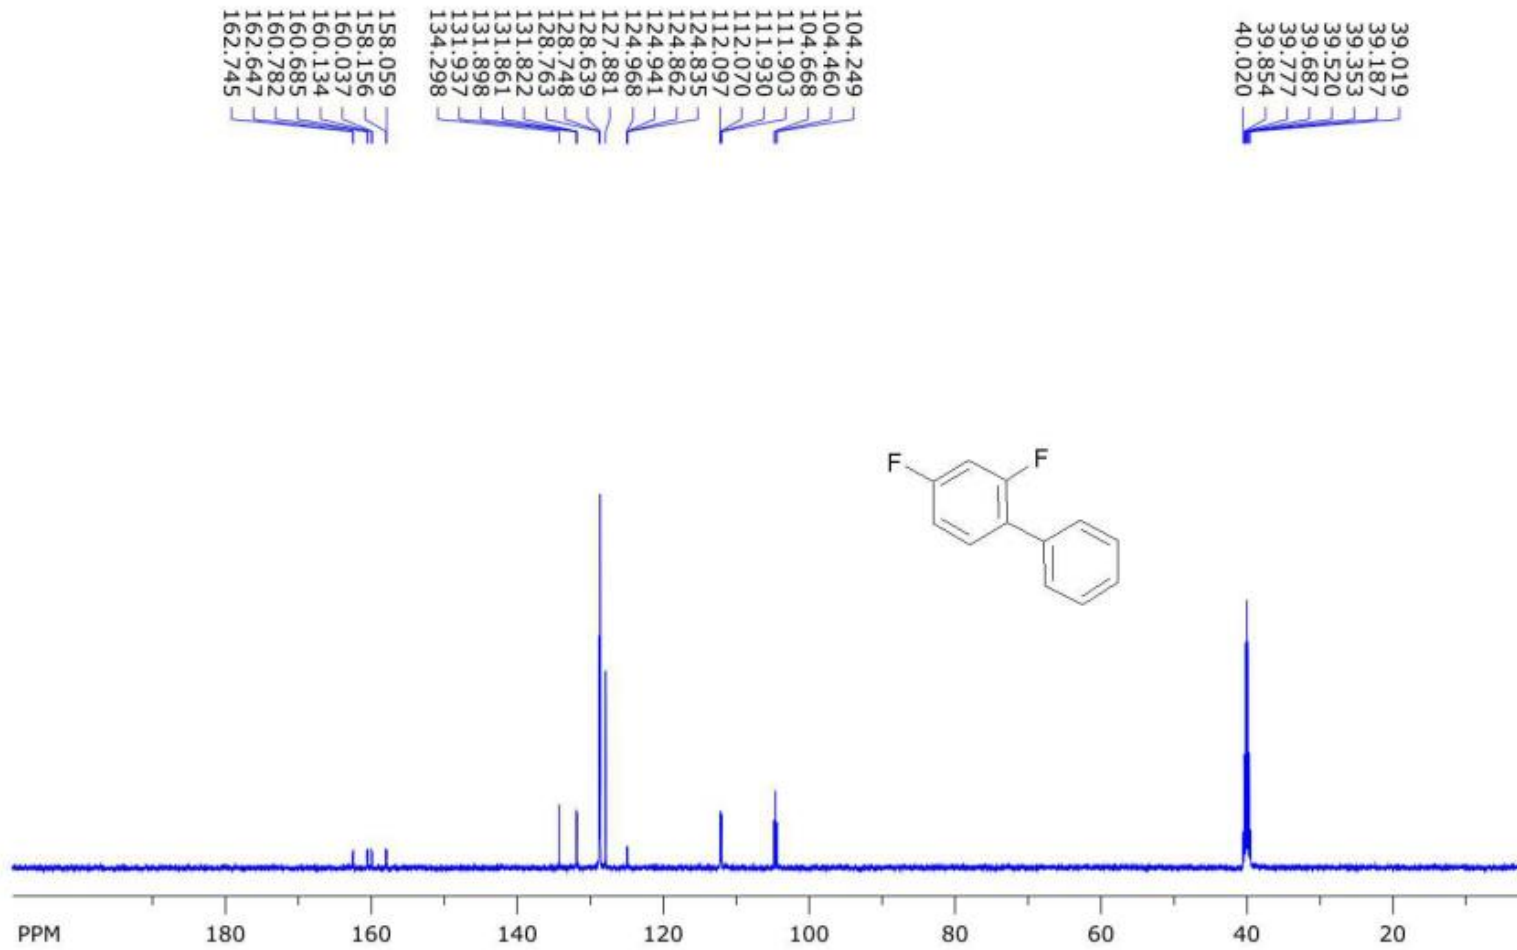

file: D:\NAPO\NMR\500-2\mkr11705\6\fid expt: <zgpg30>  
transmitter freq.: 125.772879 MHz  
time domain size: 65536 points  
width: 36057.69 Hz = 286.6889 ppm = 0.550197 Hz/pt  
number of scans: 128

freq. of 0 ppm: 125.757843 MHz  
processed size: 32768 complex points  
LB: 2.000 GF: 0.0000  
Hz/cm: 1049.821 ppm/cm: 8.34696



# Compound 2g

SpinWorks 4: IVA 1551 1H DMSO

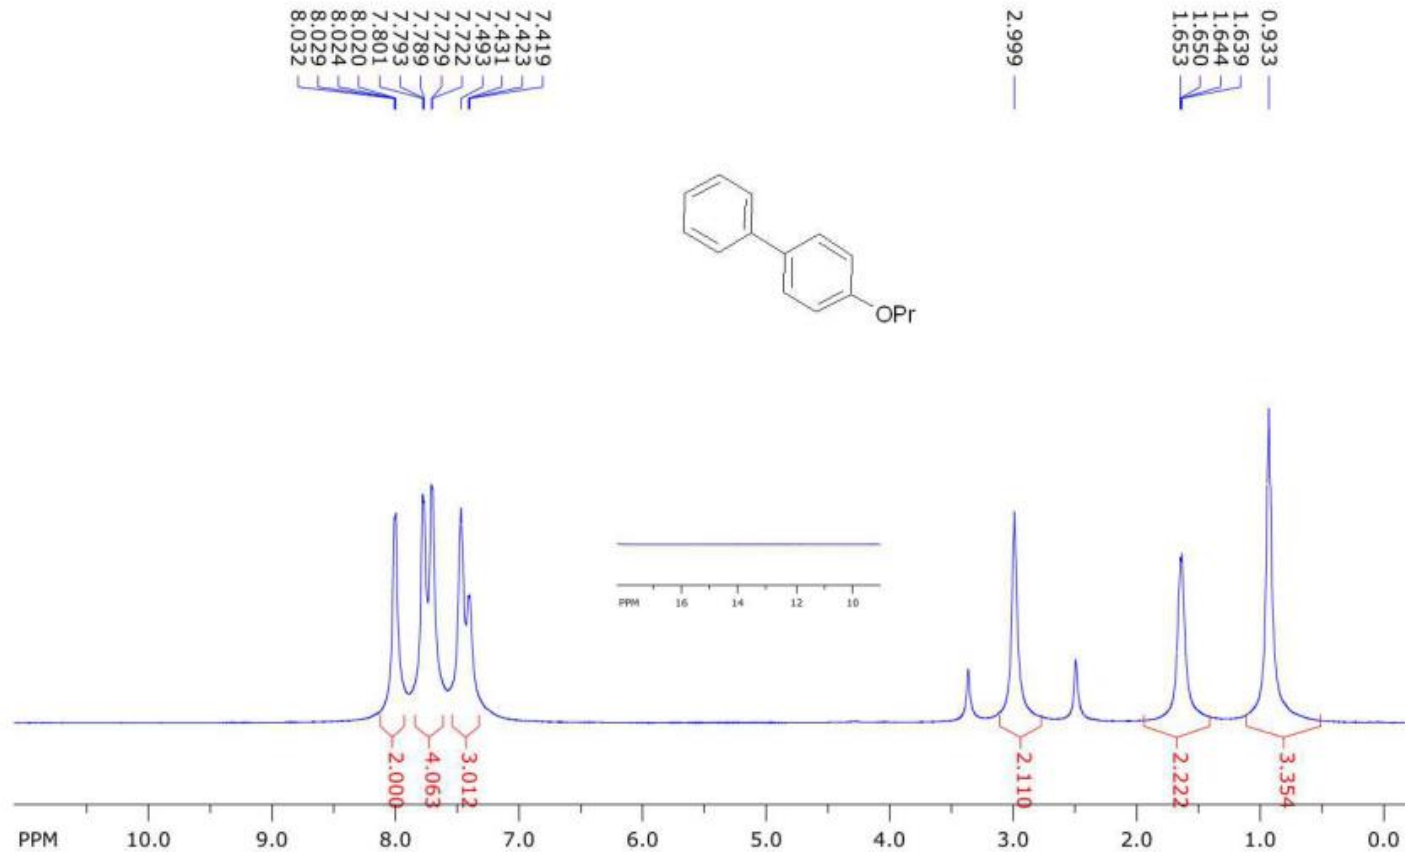

file: ...APO\NMR\500-2\mkr11507\19 1551\fid expt: <zg30>  
transmitter freq.: 500.133001 MHz  
time domain size: 65536 points  
width: 12335.53 Hz = 24.6645 ppm = 0.188225 Hz/pt  
number of scans: 24

freq. of 0 ppm: 500.130003 MHz  
processed size: 65536 complex points  
LB: 0.300 GF: 0.0000  
Hz/cm: 227.061 ppm/cm: 0.45400

# Compound 2g

SpinWorks 4: IVA 1551 13C DMSO

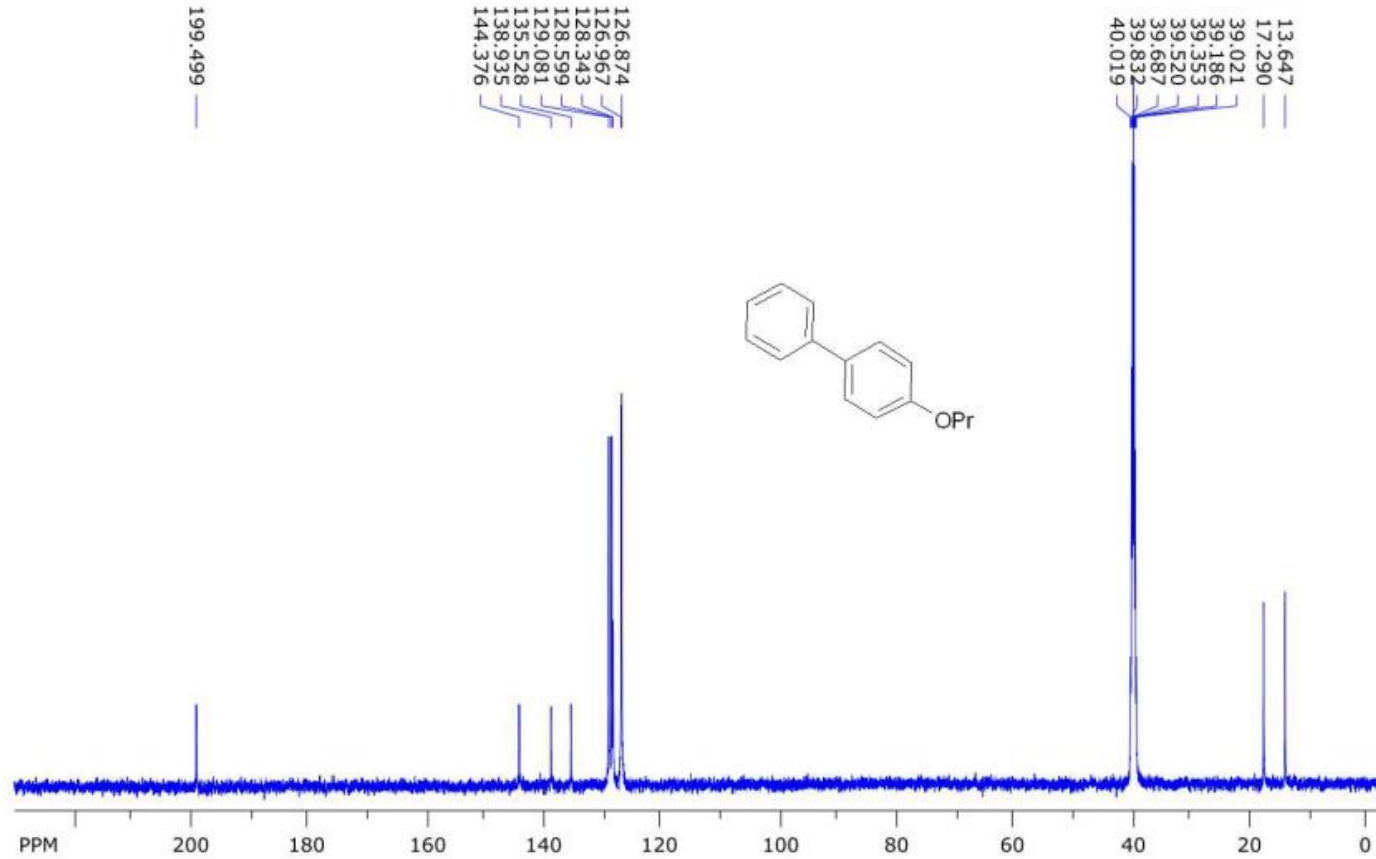

file: D:\NAPO\NMR\500-2\mkr11507\20\fid expt: <zpgg30>  
transmitter freq.: 125.772879 MHz  
time domain size: 65536 points  
width: 36057.69 Hz = 286.6889 ppm = 0.550197 Hz/pt  
number of scans: 512

freq. of 0 ppm: 125.757844 MHz  
processed size: 32768 complex points  
LB: 2.000 GF: 0.0000  
Hz/cm: 1179.055 ppm/cm: 9.37447

# Compound 2h

SpinWorks 4: SVS 94 1H CDCI3

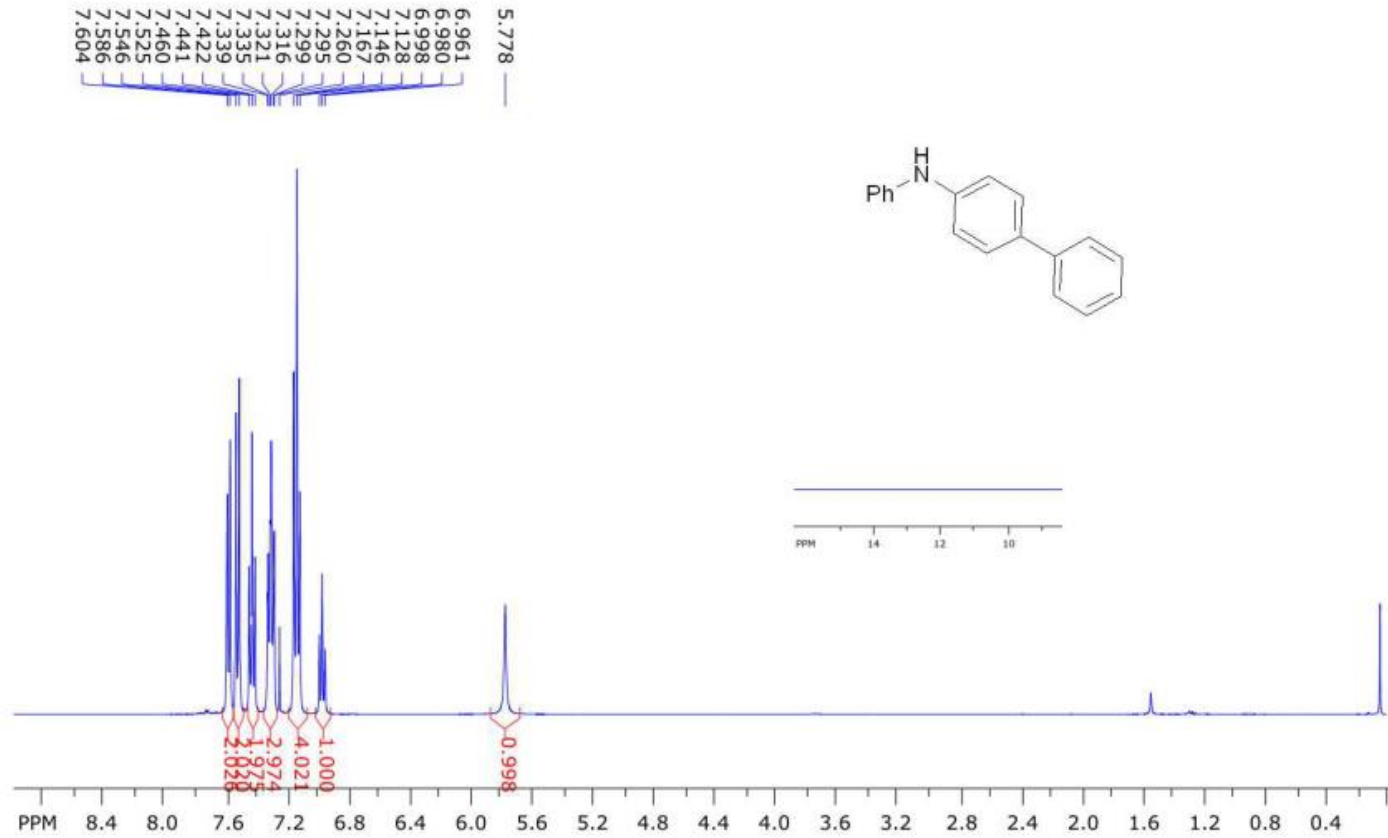

file: D:\NAPO\NMR\JELA\nmr\jn-S-94\1\fid exp: <zg30>  
transmitter freq.: 400.132471 MHz  
time domain size: 65536 points  
width: 8196.72 Hz = 20.4850 ppm = 0.125072 Hz/pt  
number of scans: 16

freq. of 0 ppm: 400.130009 MHz  
processed size: 65536 complex points  
LB: 0.300 GF: 0.0000  
Hz/cm: 144.349 ppm/cm: 0.36075

# Compound 2h

SpinWorks 4: SVS 94 13C CDCL3

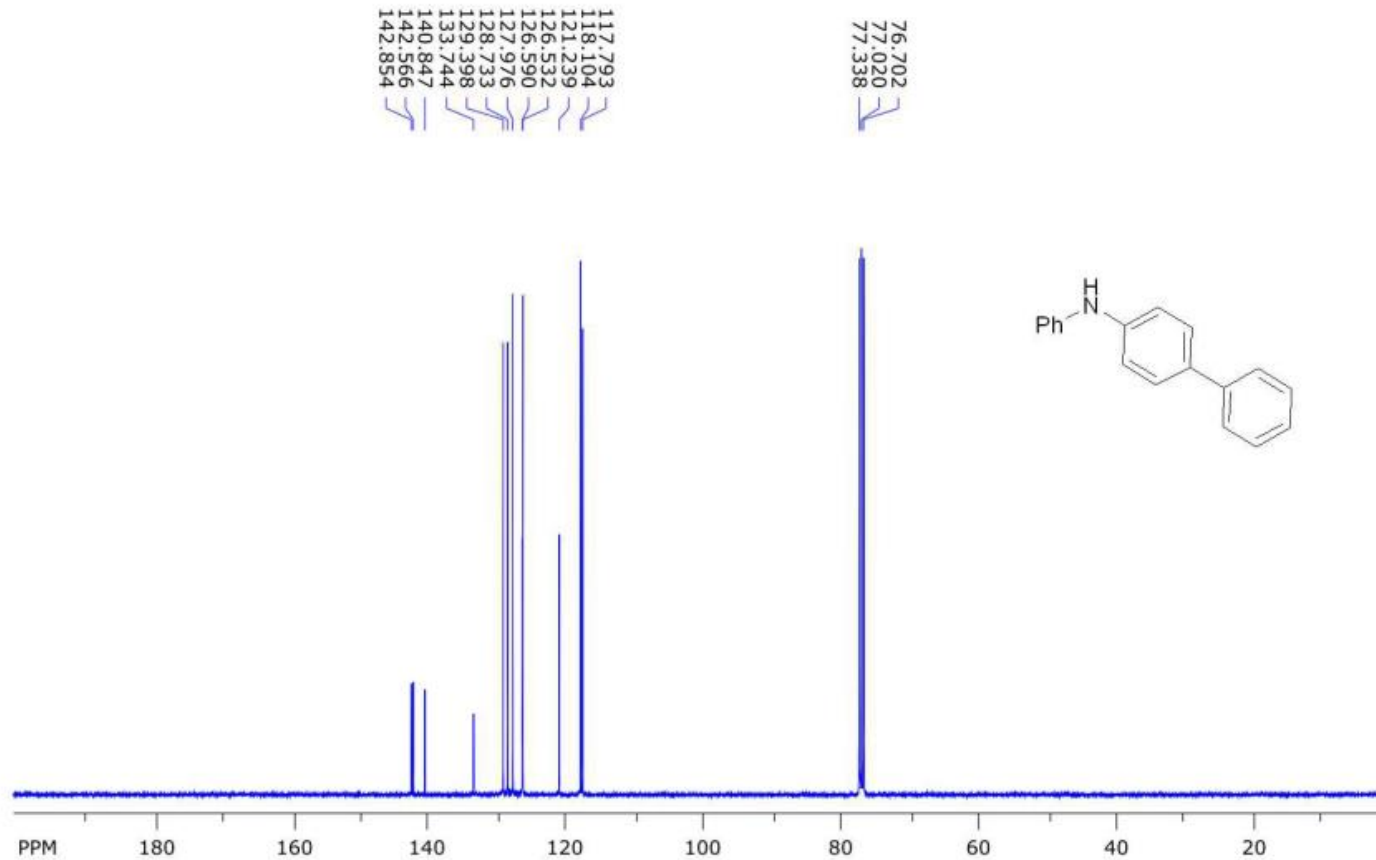

file: D:\NAPO\NMR\JELA\nmr\jn-S-94\2\fid exp: <zgpg30>  
transmitter freq.: 100.622830 MHz  
time domain size: 65536 points  
width: 23809.52 Hz = 236.6215 ppm = 0.363305 Hz/pt  
number of scans: 3500

freq. of 0 ppm: 100.612771 MHz  
processed size: 32768 complex points  
LB: 1.000 GF: 0.0000  
Hz/cm: 808.049 ppm/cm: 8.03047

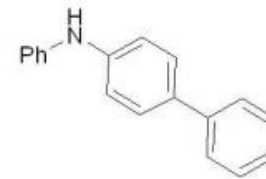

# Compound 2i

SpinWorks 4: IVAB 3283 1H CDCI3

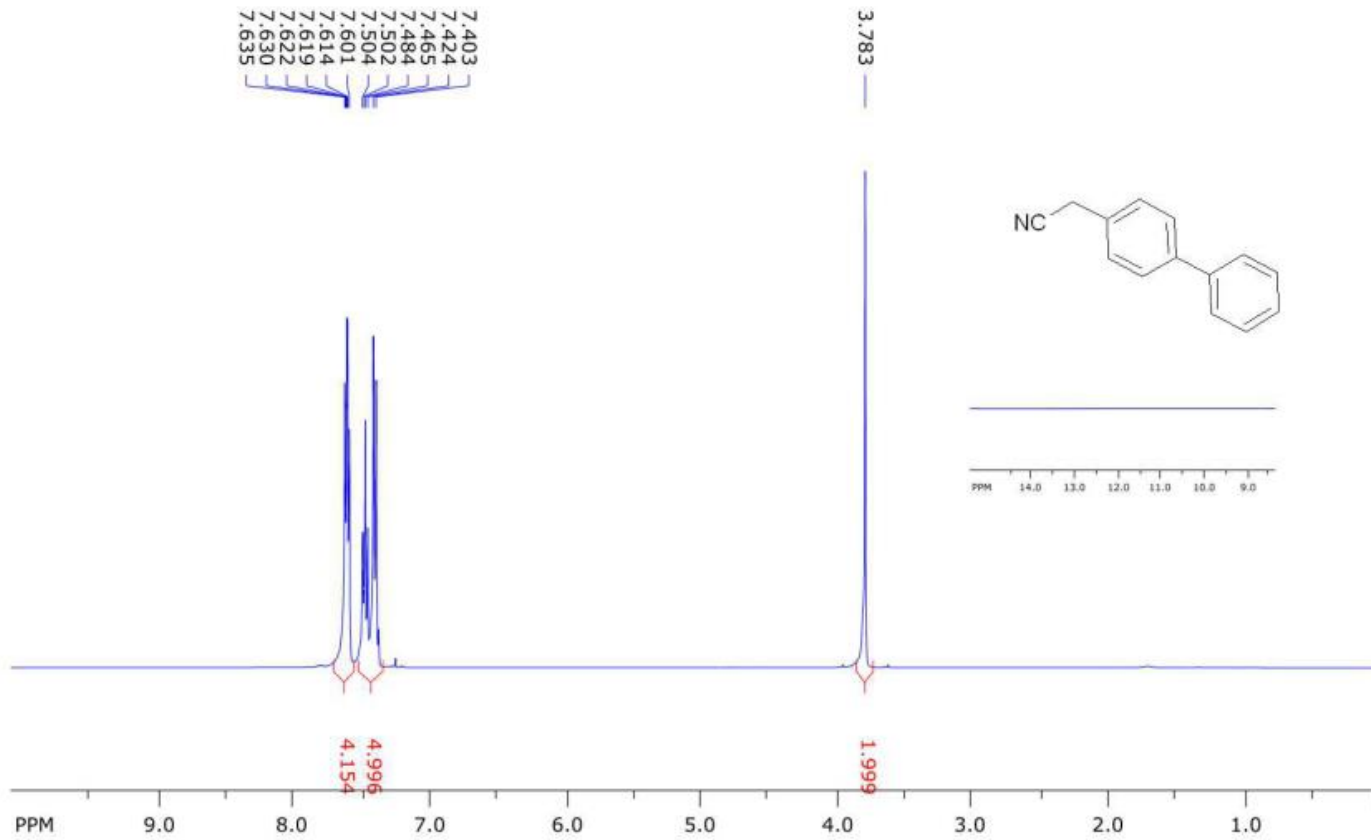

file: ...akia\19II2023FIDs\Ivab-3283\1H\fid expt: <zg30>  
transmitter freq.: 400.133001 MHz  
time domain size: 65536 points  
width: 6393.86 Hz = 15.9793 ppm = 0.097563 Hz/pt  
number of scans: 64

freq. of 0 ppm: 400.130010 MHz  
processed size: 65536 complex points  
LB: 0.300 GF: 0.0000  
Hz/cm: 162.676 ppm/cm: 0.40655

# Compound 2i

SpinWorks 4: IVAB 3283 13C

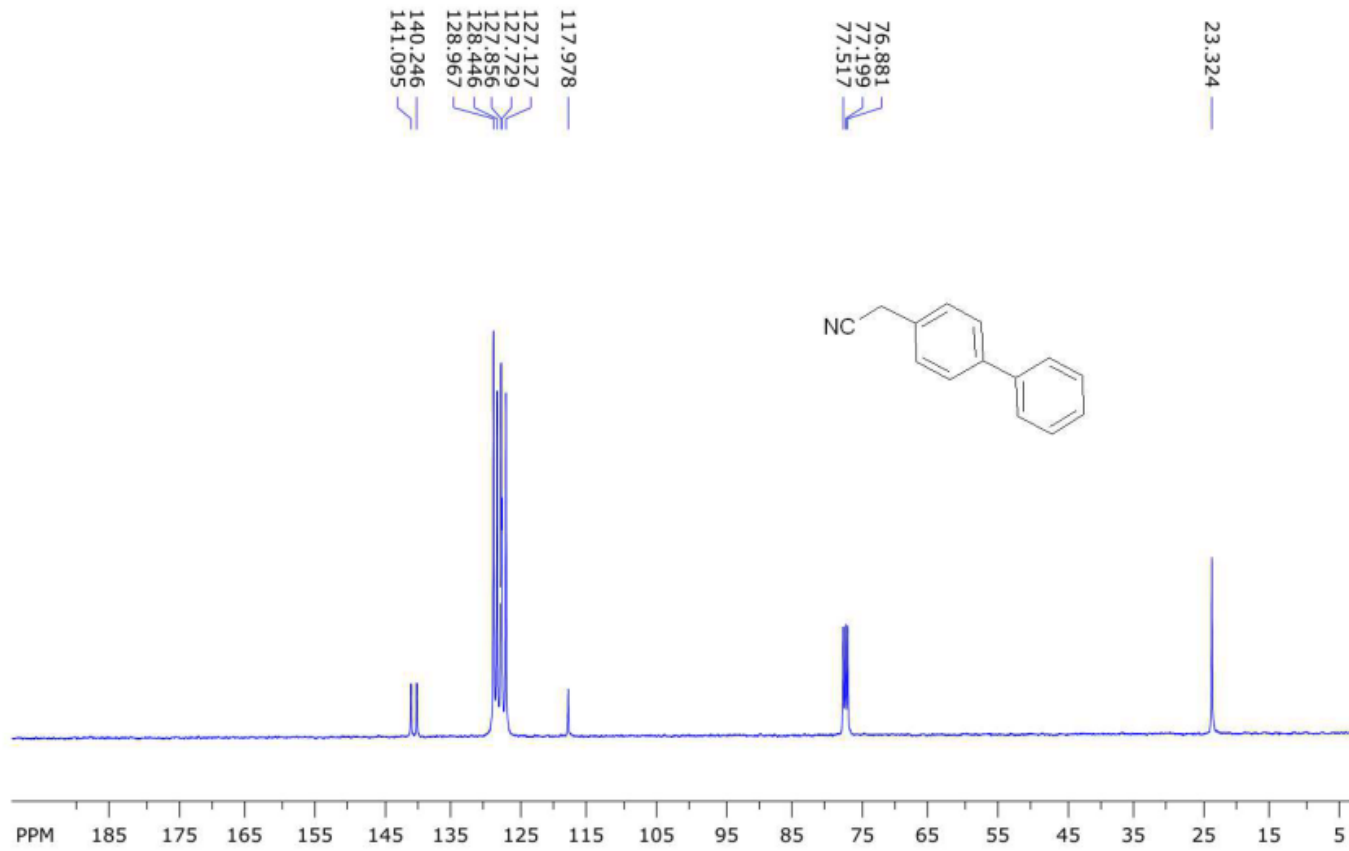

file: ...kia\19II2023FIDs\Ivab-3283\13C\fid exp: <zgpg30>  
transmitter freq.: 100.623836 MHz  
time domain size: 65536 points  
width: 24038.46 Hz = 238.8943 ppm = 0.366798 Hz/pt  
number of scans: 751

freq. of 0 ppm: 100.612769 MHz  
processed size: 32768 complex points  
LB: 10.000 GF: 0.0000  
Hz/cm: 798.800 ppm/cm: 7.93848

# Compound 2j

SpinWorks 4: SVS 134 1H DMSO

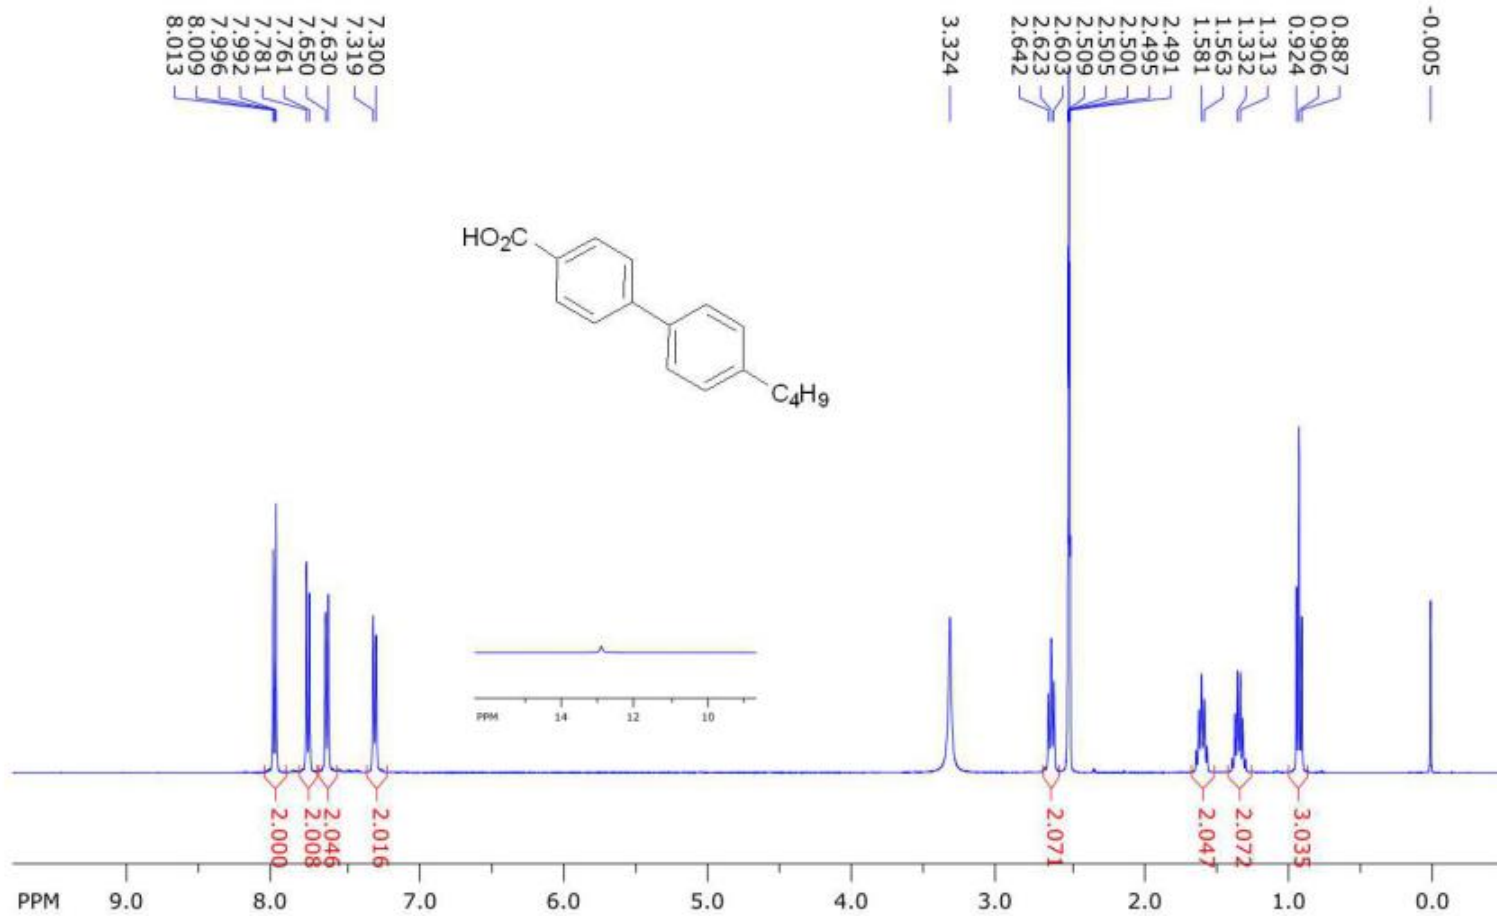

file: D:\NAPO\NMR\JELA\nmr\jn-134\1\fid expt: <zg30>  
 transmitter freq.: 400.132471 MHz  
 time domain size: 65536 points  
 width: 8196.72 Hz = 20.4850 ppm = 0.125072 Hz/pt  
 number of scans: 16

freq. of 0 ppm: 400.130002 MHz  
 processed size: 65536 complex points  
 LB: 0.300 GF: 0.0000  
 Hz/cm: 165.385 ppm/cm: 0.41333

# Compound 2j

SpinWorks 4: SVS 134 13C DMSO

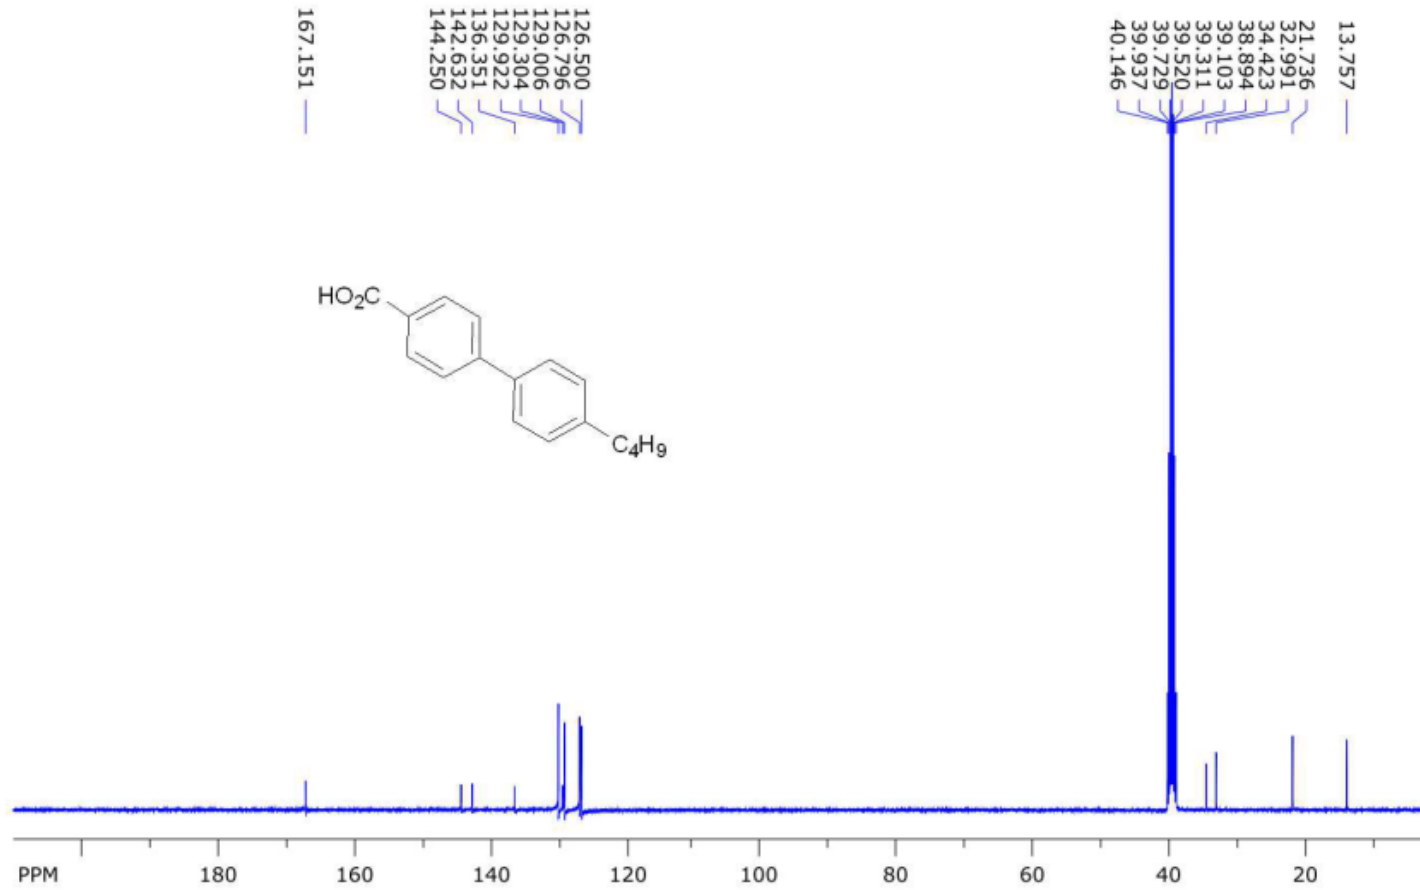

file: D:\NAPO\NMR\JELA\nmr\jn-134\2\fid expt: <zggp30>  
transmitter freq.: 100.622830 MHz  
time domain size: 65536 points  
width: 23809.52 Hz = 236.6215 ppm = 0.363305 Hz/pt  
number of scans: 2000

freq. of 0 ppm: 100.612816 MHz  
processed size: 32768 complex points  
LB: 1.000 GF: 0.0000  
Hz/cm: 840.708 ppm/cm: 8.35504



# Compound 2k

SpinWorks 4: SVS 95 1H DMSO

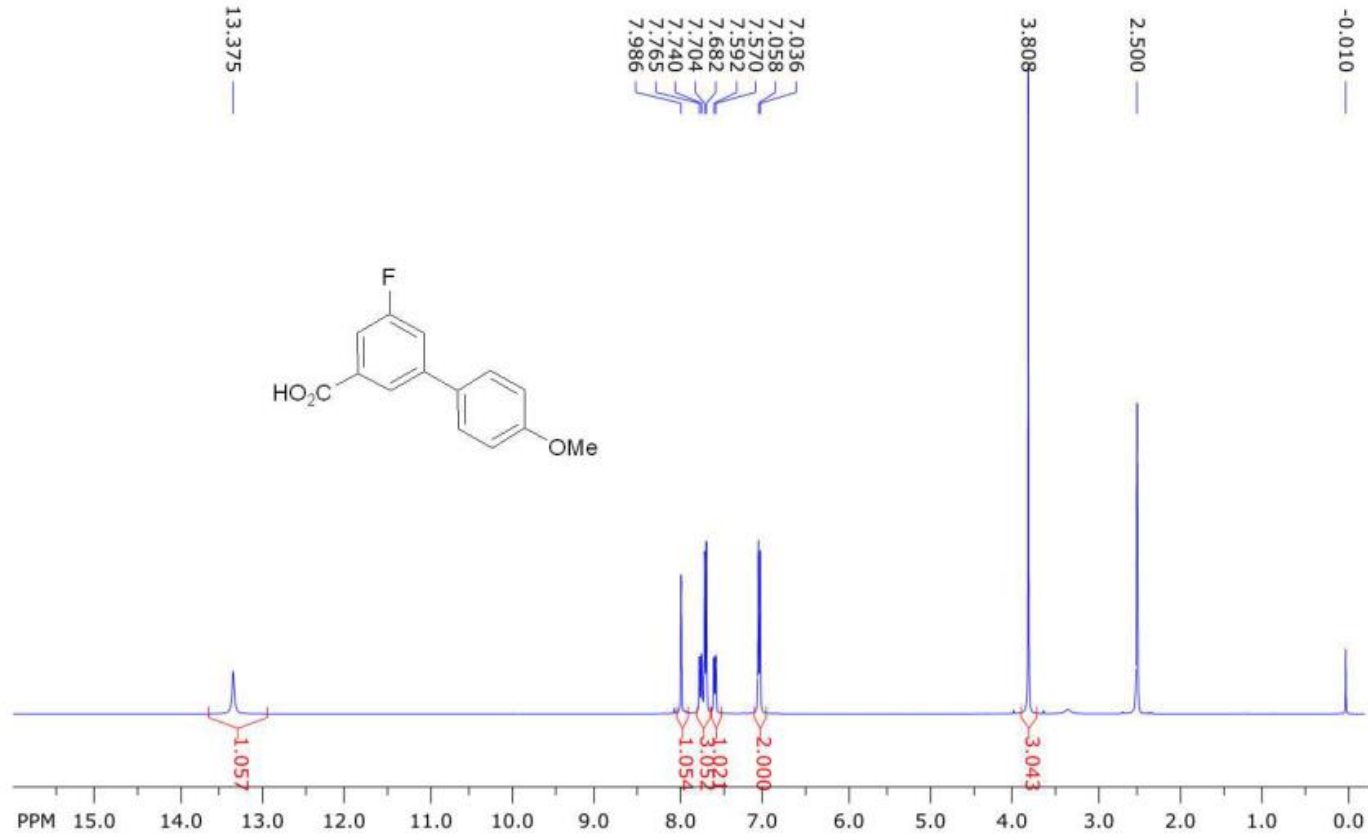

file: D:\NAPO\NMR\JELA\nmr\jn-S-95\1\fid expt: <zg30>  
transmitter freq.: 400.132471 MHz  
time domain size: 65536 points  
width: 8196.72 Hz = 20.4850 ppm = 0.125072 Hz/pt  
number of scans: 16

freq. of 0 ppm: 400.130002 MHz  
processed size: 65536 complex points  
LB: 0.300 GF: 0.0000  
Hz/cm: 260.409 ppm/cm: 0.65081

# Compound 2k

SpinWorks 4: SVS 95 13C DMSO

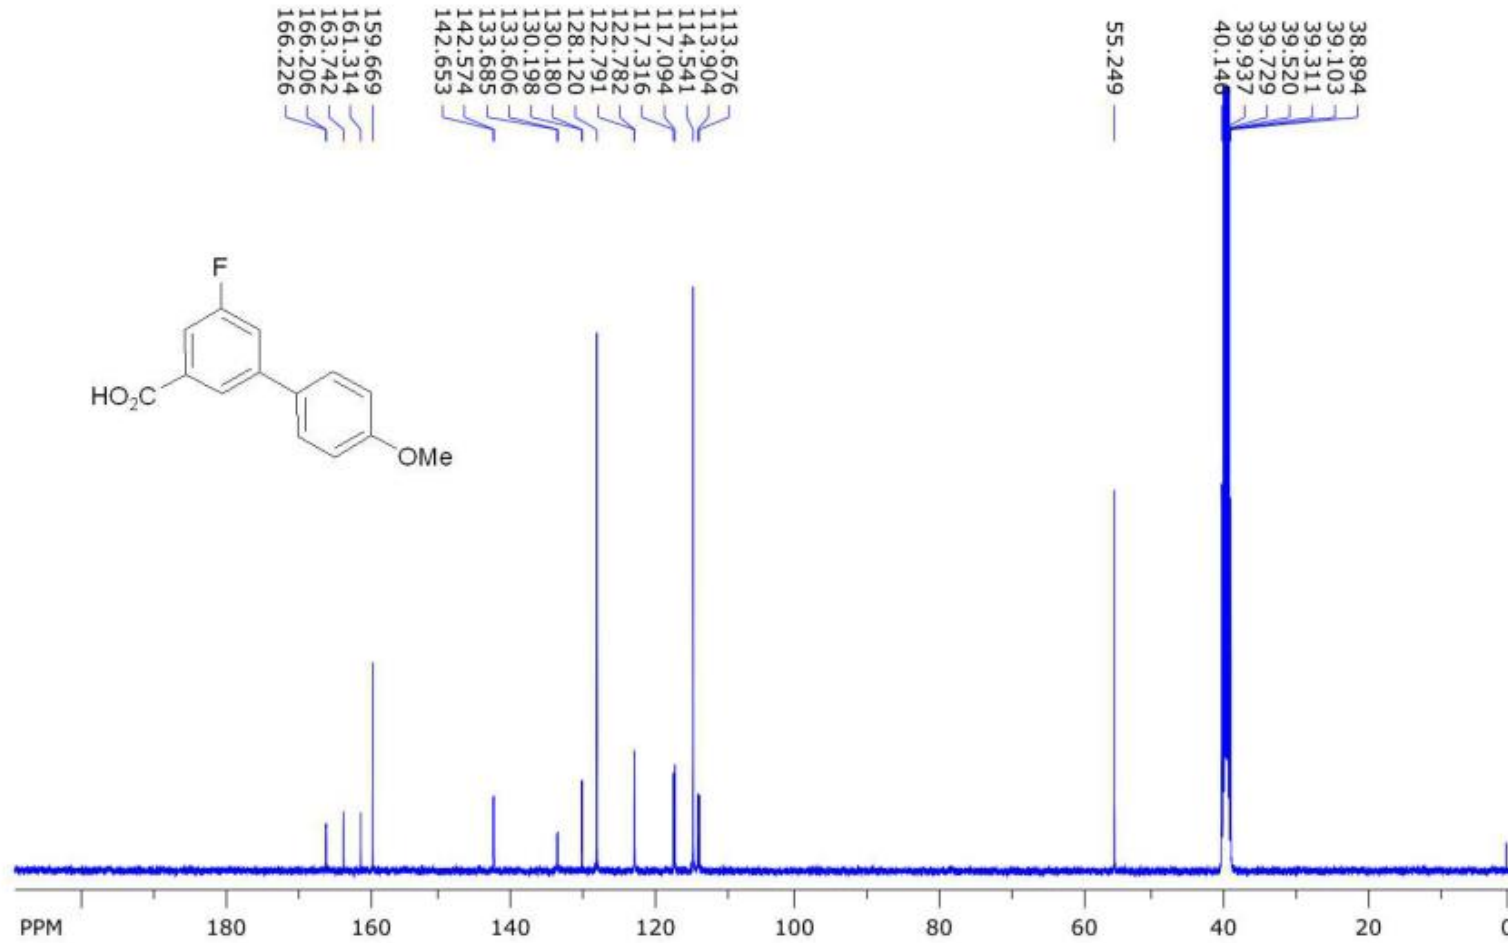

file: D:\NAPO\NMR\JELA\nmr\jn-S-95\2\fid expt: <zpgg30>  
transmitter freq.: 100.622830 MHz  
time domain size: 65536 points  
width: 23809.52 Hz = 236.6215 ppm = 0.363305 Hz/pt  
number of scans: 3500

freq. of 0 ppm: 100.612814 MHz  
processed size: 32768 complex points  
LB: 1.000 GF: 0.0000  
Hz/cm: 852.297 ppm/cm: 8.47021

# Compound 2I

SpinWorks 4: SVS 93 1H CDCI3

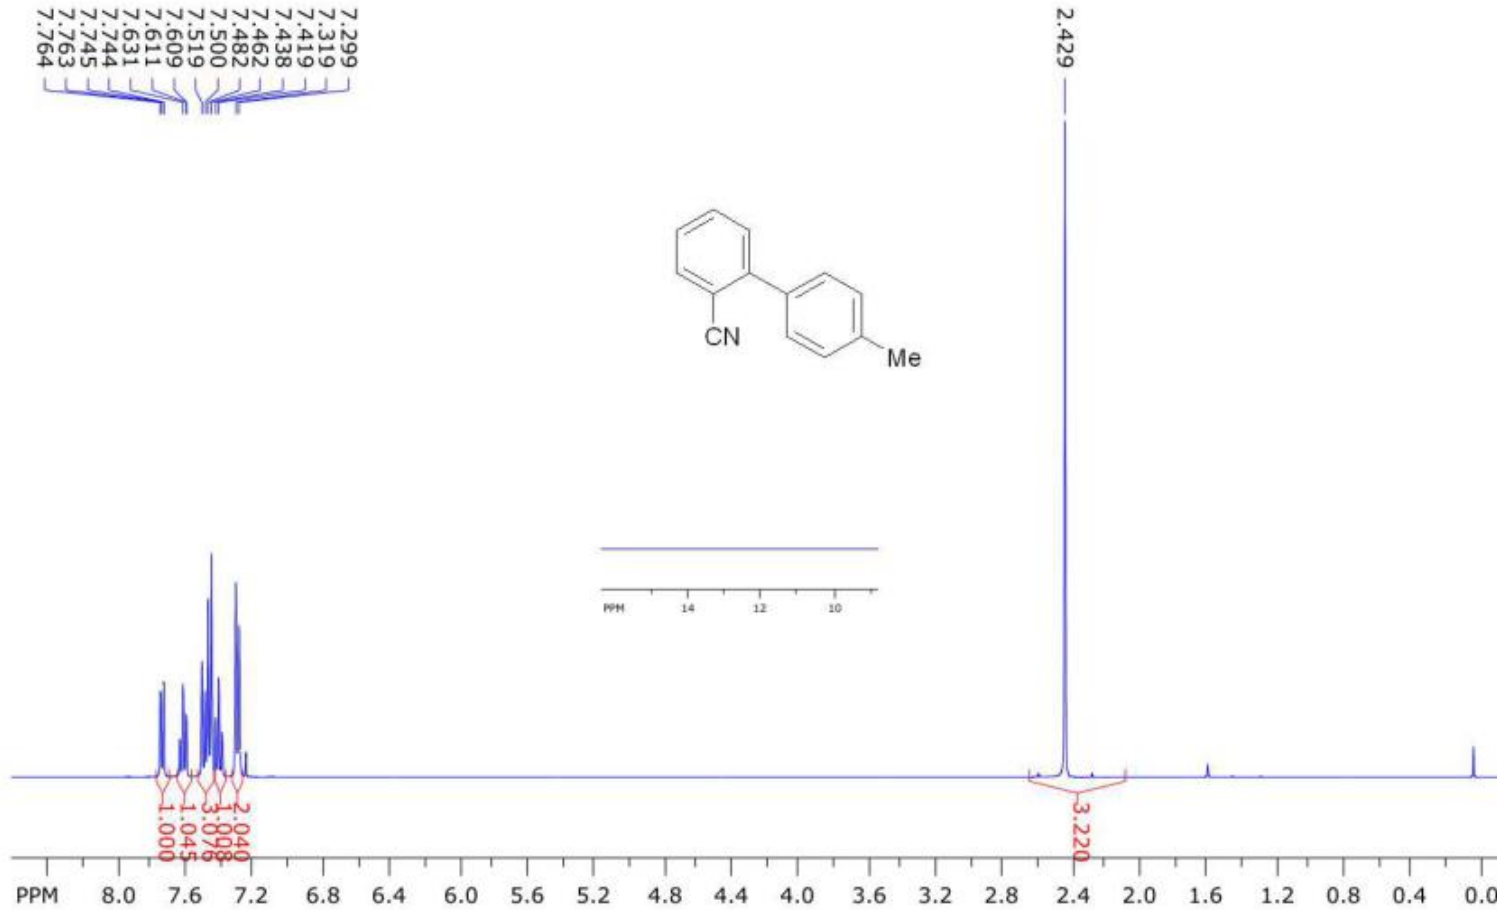

file: D:\NAPO\NMR\JELA\nmr\jn-S-93\1\fid expt: <zg30>  
transmitter freq.: 400.132471 MHz  
time domain size: 65536 points  
width: 8196.72 Hz = 20.4850 ppm = 0.125072 Hz/pt  
number of scans: 16

freq. of 0 ppm: 400.130009 MHz  
processed size: 65536 complex points  
LB: 0.300 GF: 0.0000  
Hz/cm: 141.085 ppm/cm: 0.35260

# Compound 2I

SpinWorks 4: SVS 93 13C CDCl3

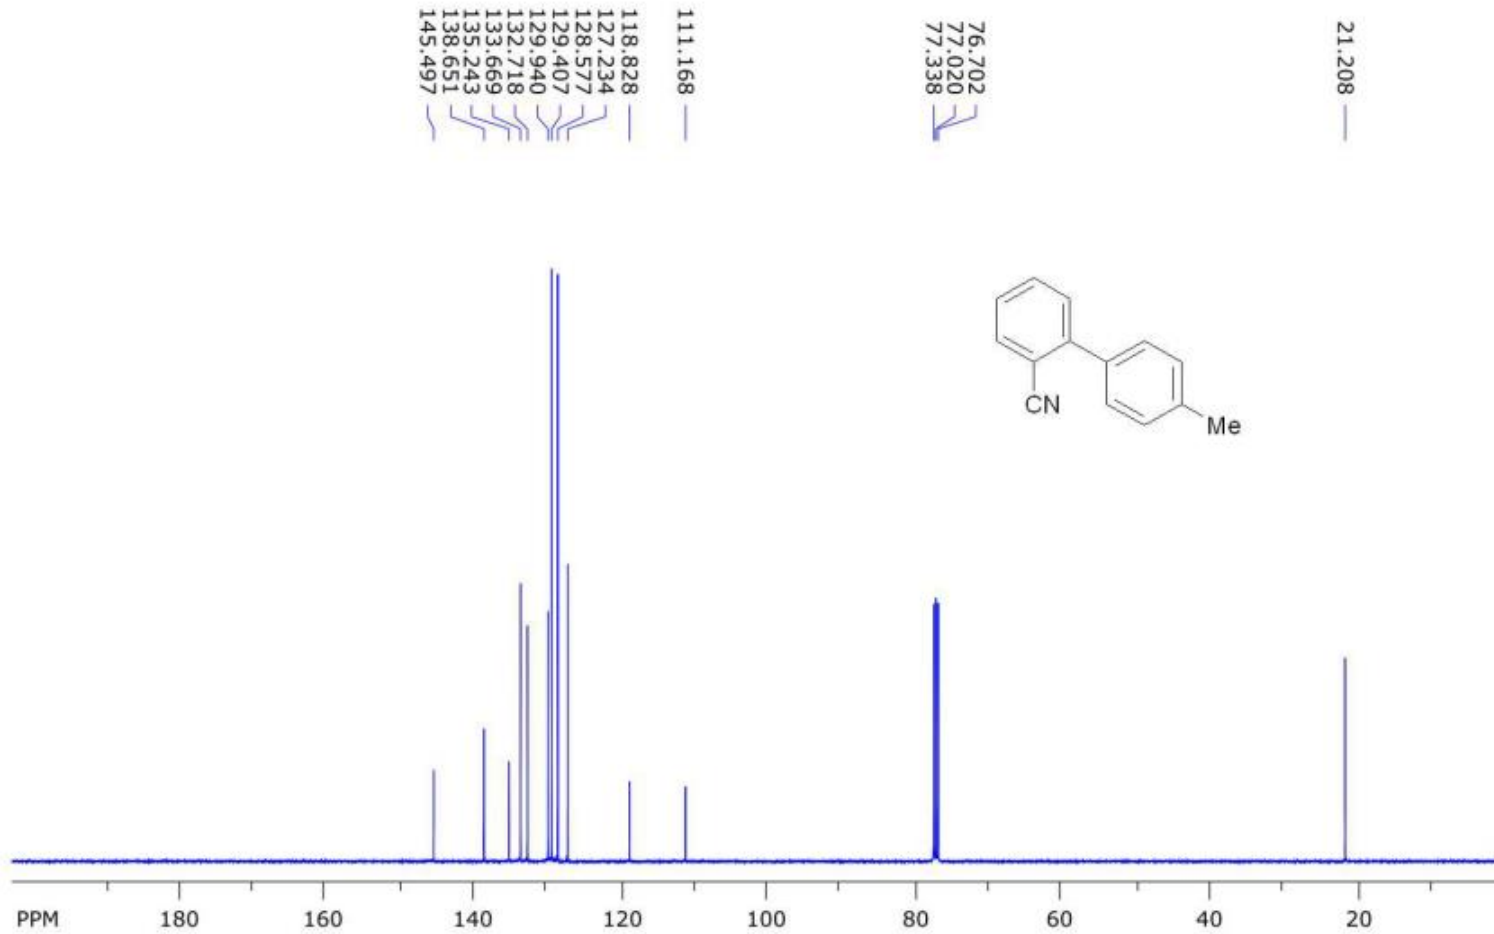

file: D:\NAPO\NMR\JELA\nmr\jn-S-93\3\fid expt: <zpgg30>  
transmitter freq.: 100.622830 MHz  
time domain size: 65536 points  
width: 23809.52 Hz = 236.6215 ppm = 0.363305 Hz/pt  
number of scans: 3500

freq. of 0 ppm: 100.612774 MHz  
processed size: 32768 complex points  
LB: 1.000 GF: 0.0000  
Hz/cm: 818.584 ppm/cm: 8.13517

# Compound 2m

SpinWorks 4:

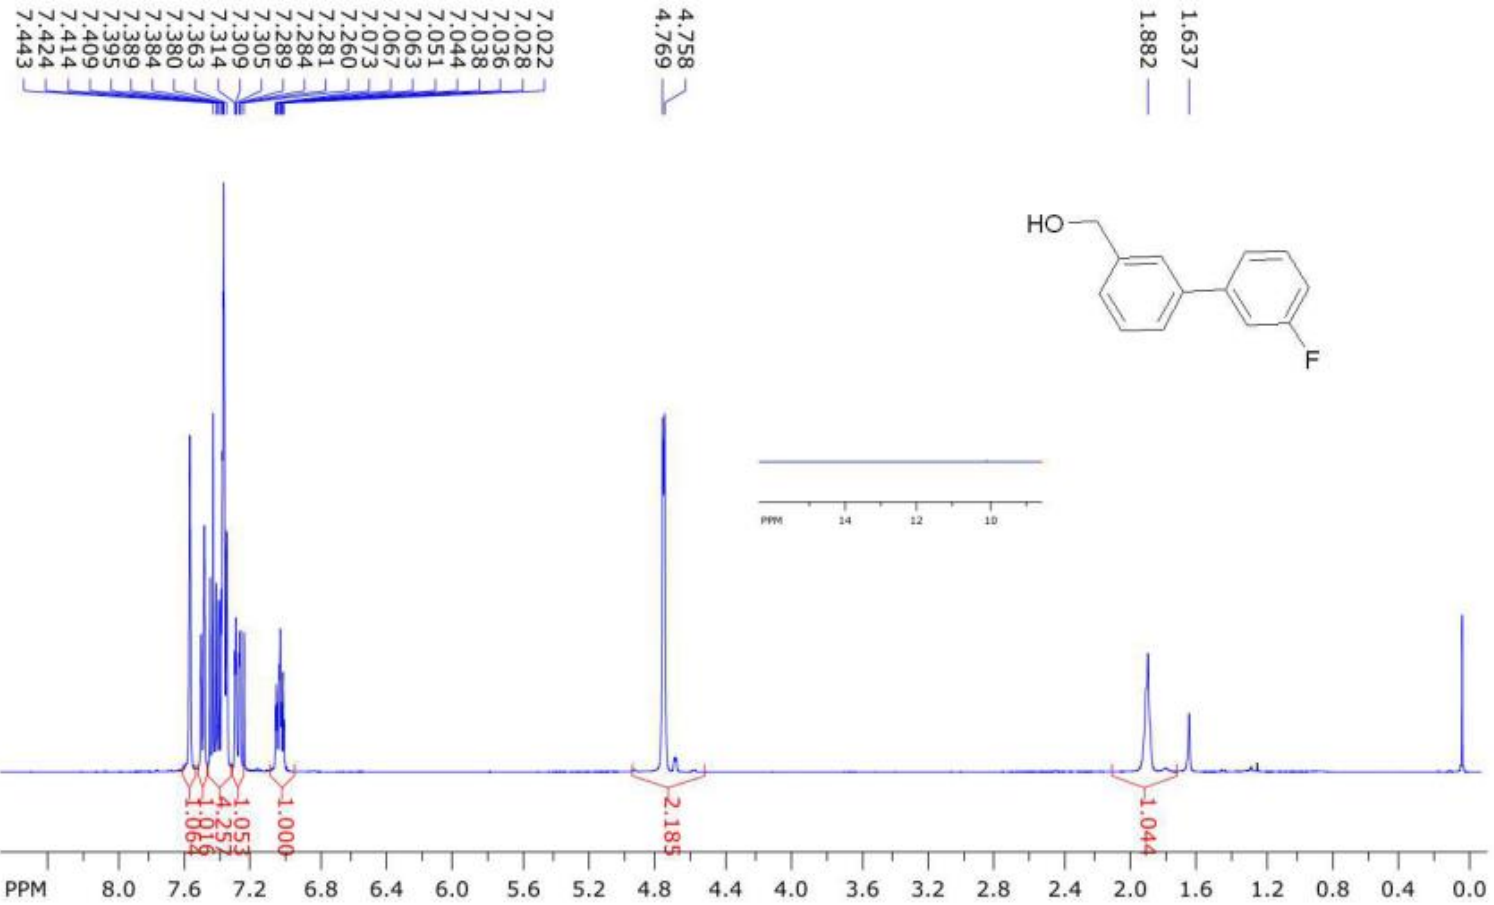

file: D:\NAPO\NMR\JELA\nmr\jn-S-80\1\fid expt: <zg30>  
 transmitter freq.: 400.132471 MHz  
 time domain size: 65536 points  
 width: 8196.72 Hz = 20.4850 ppm = 0.125072 Hz/pt  
 number of scans: 16

freq. of 0 ppm: 400.130009 MHz  
 processed size: 65536 complex points  
 LB: 0.300 GF: 0.0000  
 Hz/cm: 141.085 ppm/cm: 0.35260

# Compound 2m

SpinWorks 4: SVS 80 13C CDCl3

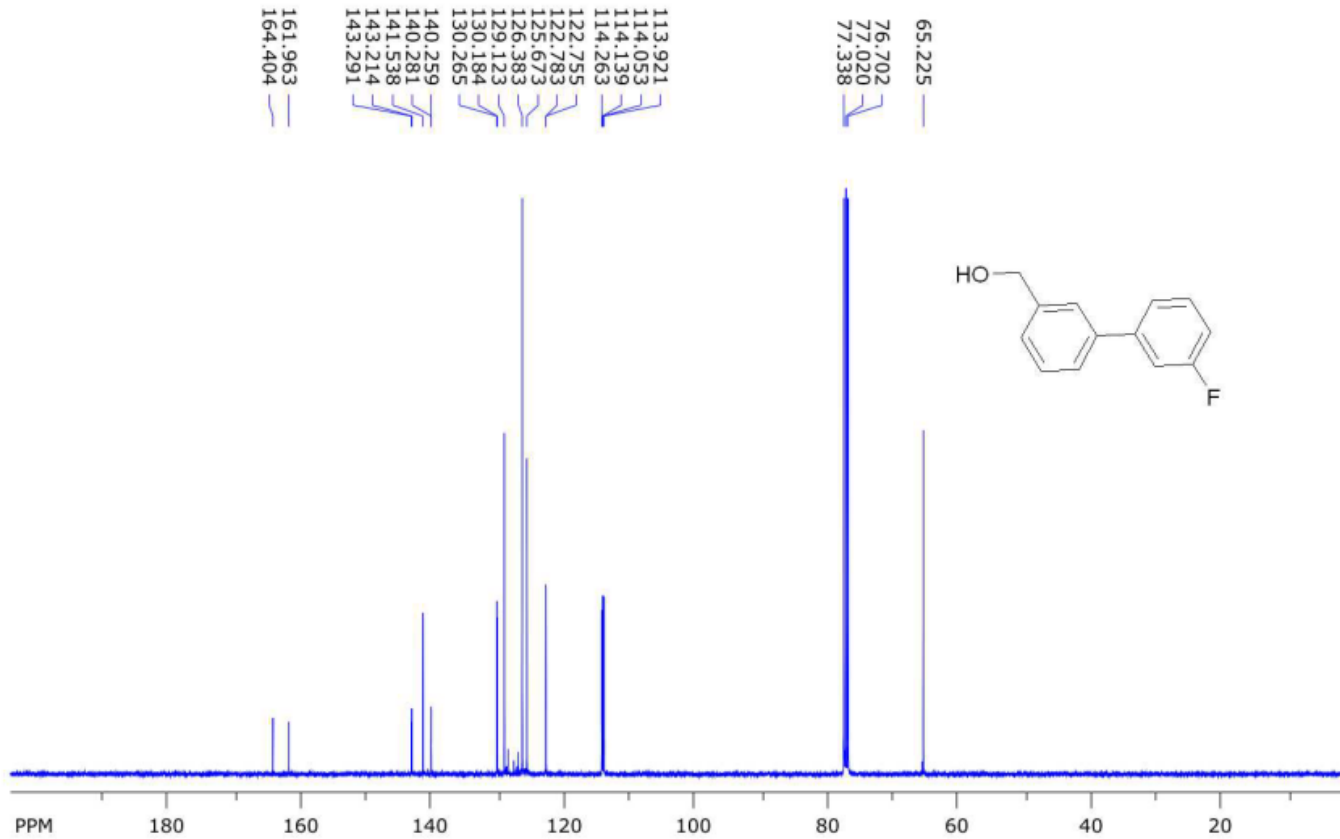

file: D:\NAPO\NMR\JELA\nmr\jn-S-80\2\fid expt: <zgpg30>  
transmitter freq.: 100.622830 MHz  
time domain size: 65536 points  
width: 23809.52 Hz = 236.6215 ppm = 0.363305 Hz/pt  
number of scans: 3500

freq. of 0 ppm: 100.612770 MHz  
processed size: 32768 complex points  
LB: 1.000 GF: 0.0000  
Hz/cm: 821.745 ppm/cm: 8.16658

# Compound 2n

SpinWorks 4: SVS 82 1H DMSO

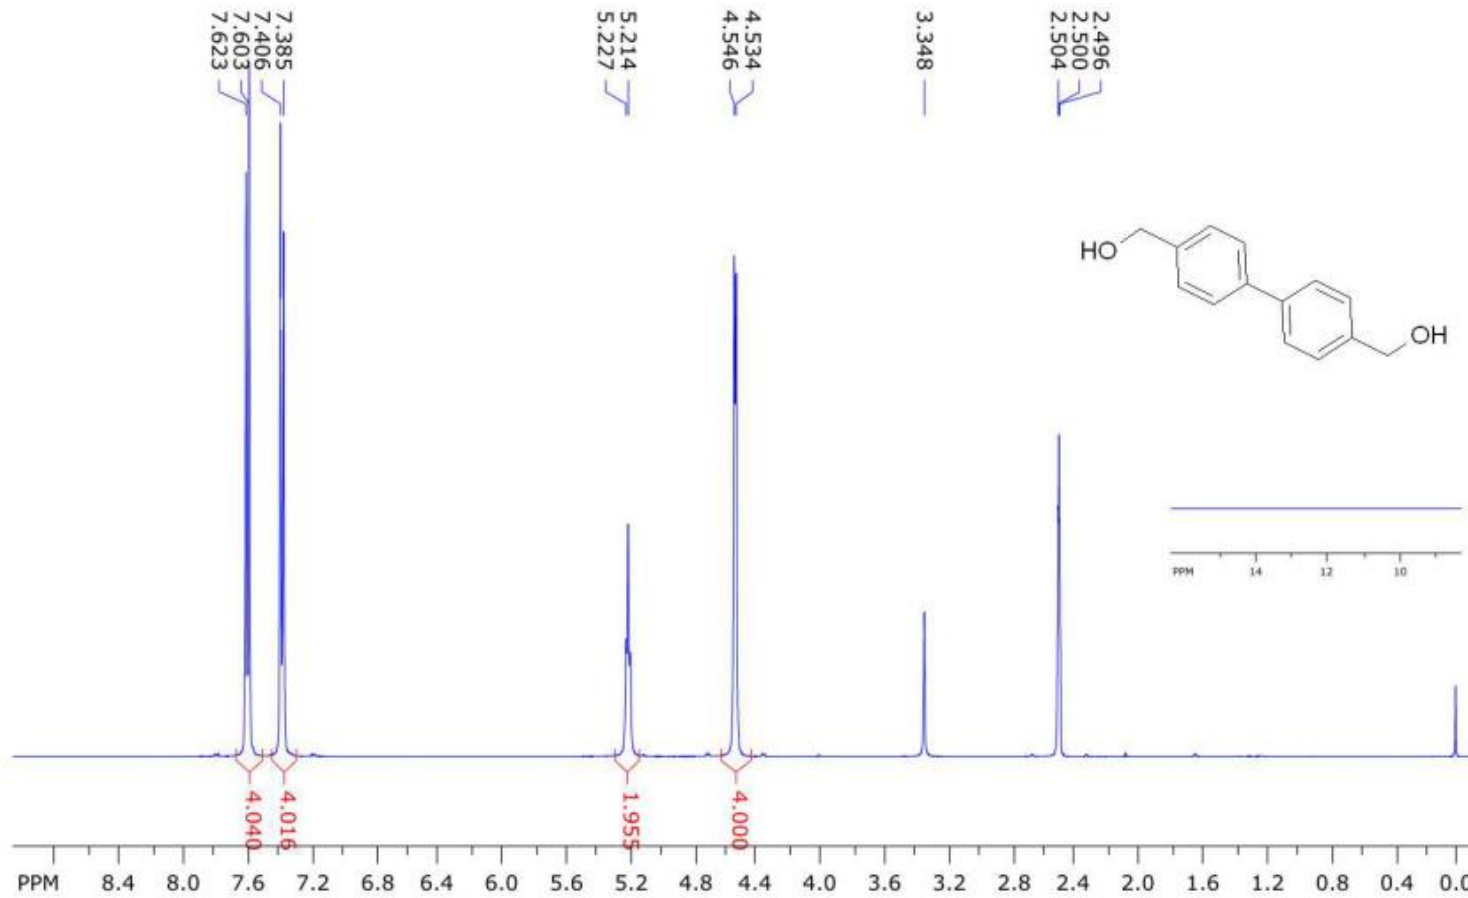

file: D:\NAPO\NMR\JELA\nmr\jn-82\1\fid expt: <zg30>  
transmitter freq.: 400.132471 MHz  
time domain size: 65536 points  
width: 8196.72 Hz = 20.4850 ppm = 0.125072 Hz/pt  
number of scans: 16

freq. of 0 ppm: 400.130002 MHz  
processed size: 65536 complex points  
LB: 0.300 GF: 0.0000  
Hz/cm: 147.976 ppm/cm: 0.36982

# Compound 2n

SpinWorks 4: SVS 82 13C DMSO

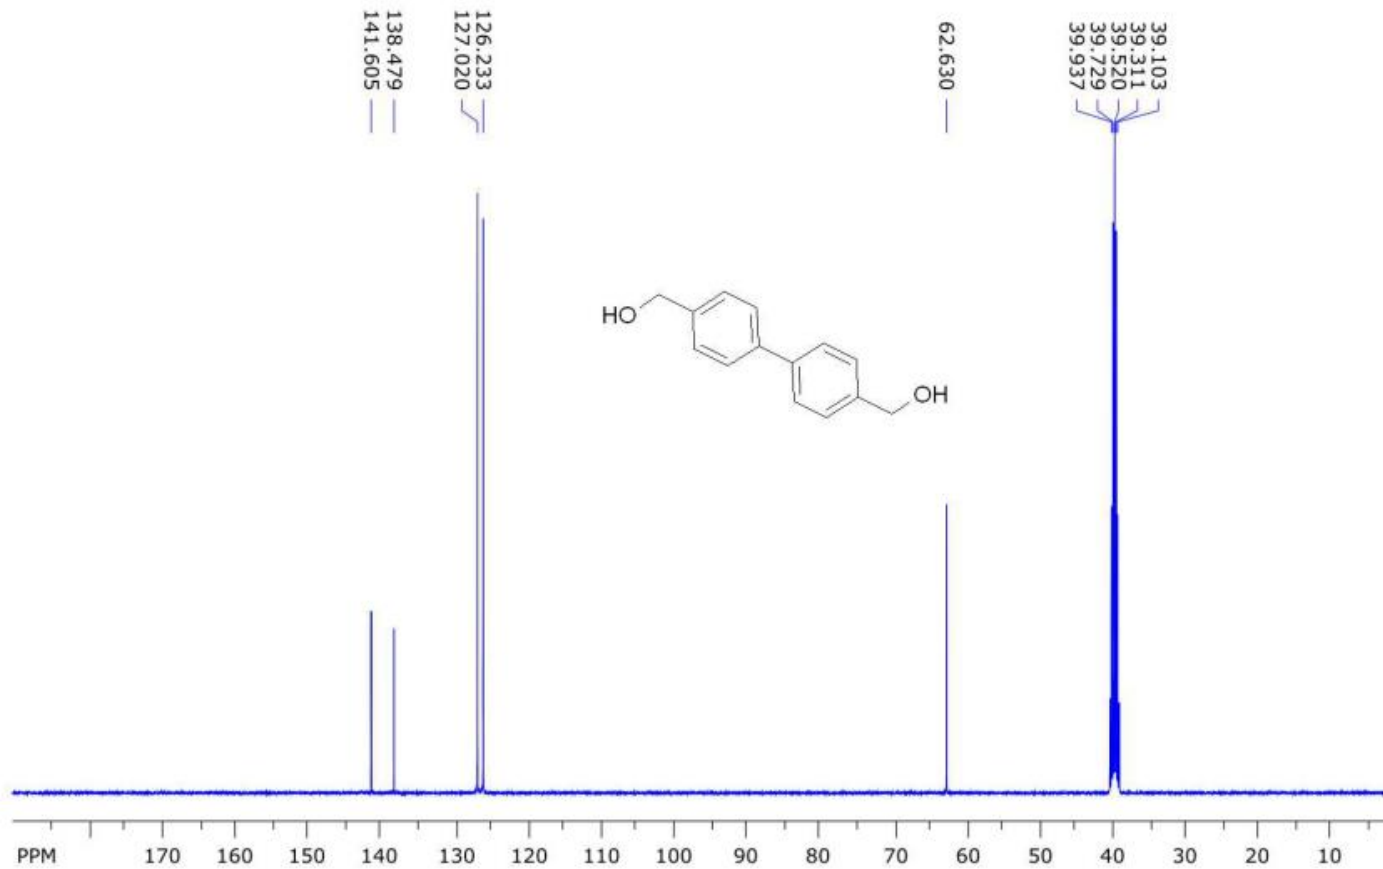

file: D:\NAPO\NMR\JELA\nmr\jn-82\2\fid expt: <zgpg30>  
transmitter freq.: 100.622830 MHz  
time domain size: 65536 points  
width: 23809.52 Hz = 236.6215 ppm = 0.363305 Hz/pt  
number of scans: 2800

freq. of 0 ppm: 100.612814 MHz  
processed size: 32768 complex points  
LB: 1.000 GF: 0.0000  
Hz/cm: 764.855 ppm/cm: 7.60120



# Compound 2o

SpinWorks 4: IVA 1552 1H CDCl3

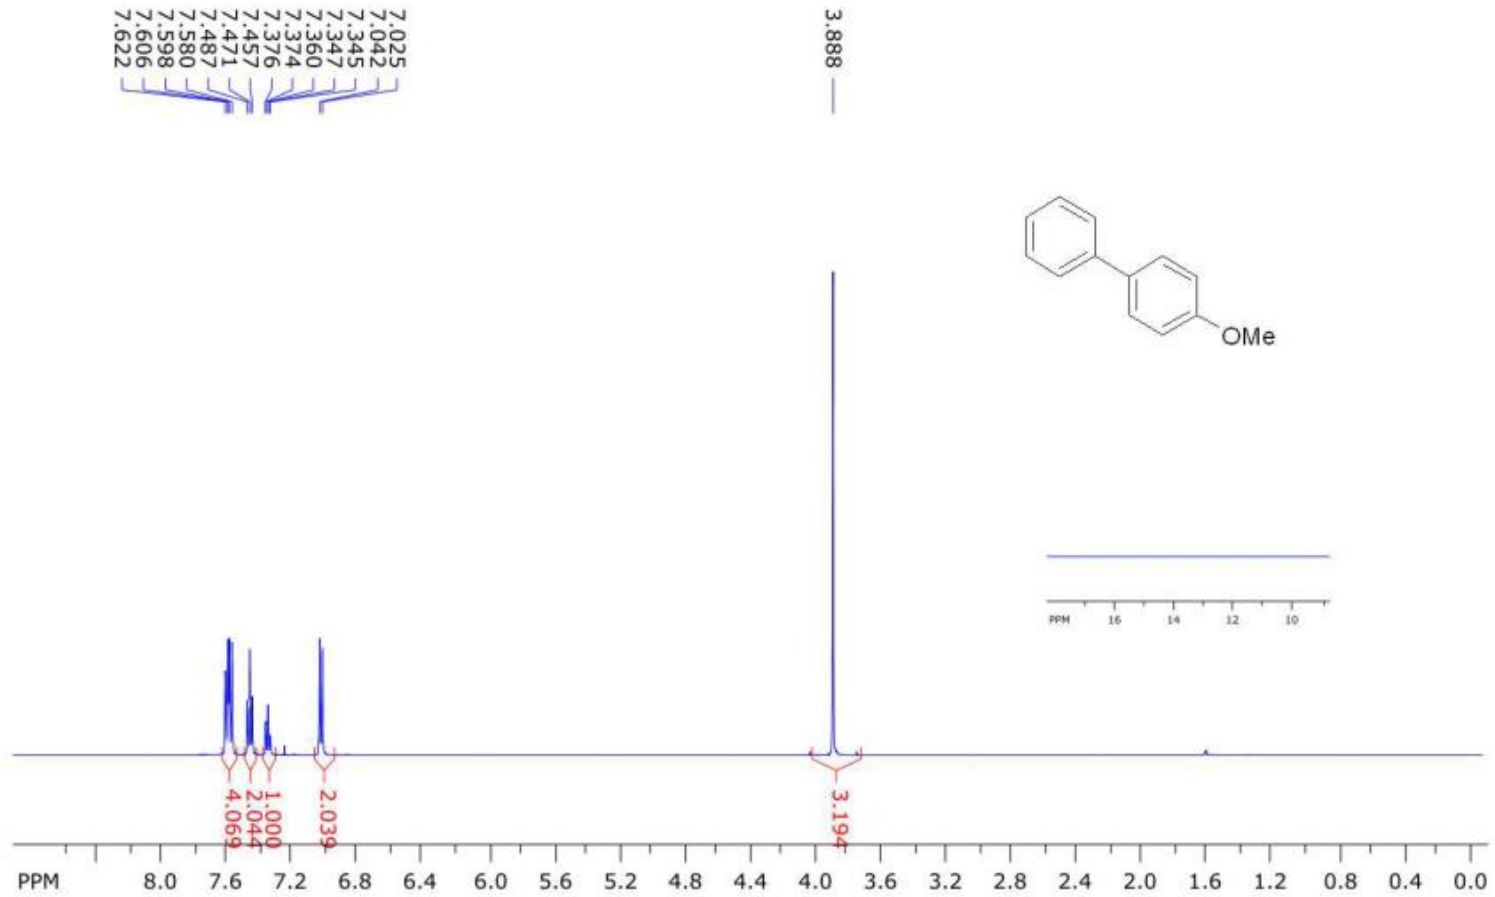

file: D:\NAPO\NMR\500-2\mkr23004\19\fid exp: <zg30>  
transmitter freq.: 500.133001 MHz  
time domain size: 65536 points  
width: 12335.53 Hz = 24.6645 ppm = 0.188225 Hz/pt  
number of scans: 24

freq. of 0 ppm: 500.130023 MHz  
processed size: 65536 complex points  
LB: 0.300 GF: 0.0000  
Hz/cm: 180.666 ppm/cm: 0.36124

# Compound 2o

SpinWorks 4: IVA 1552 13C CDCl3

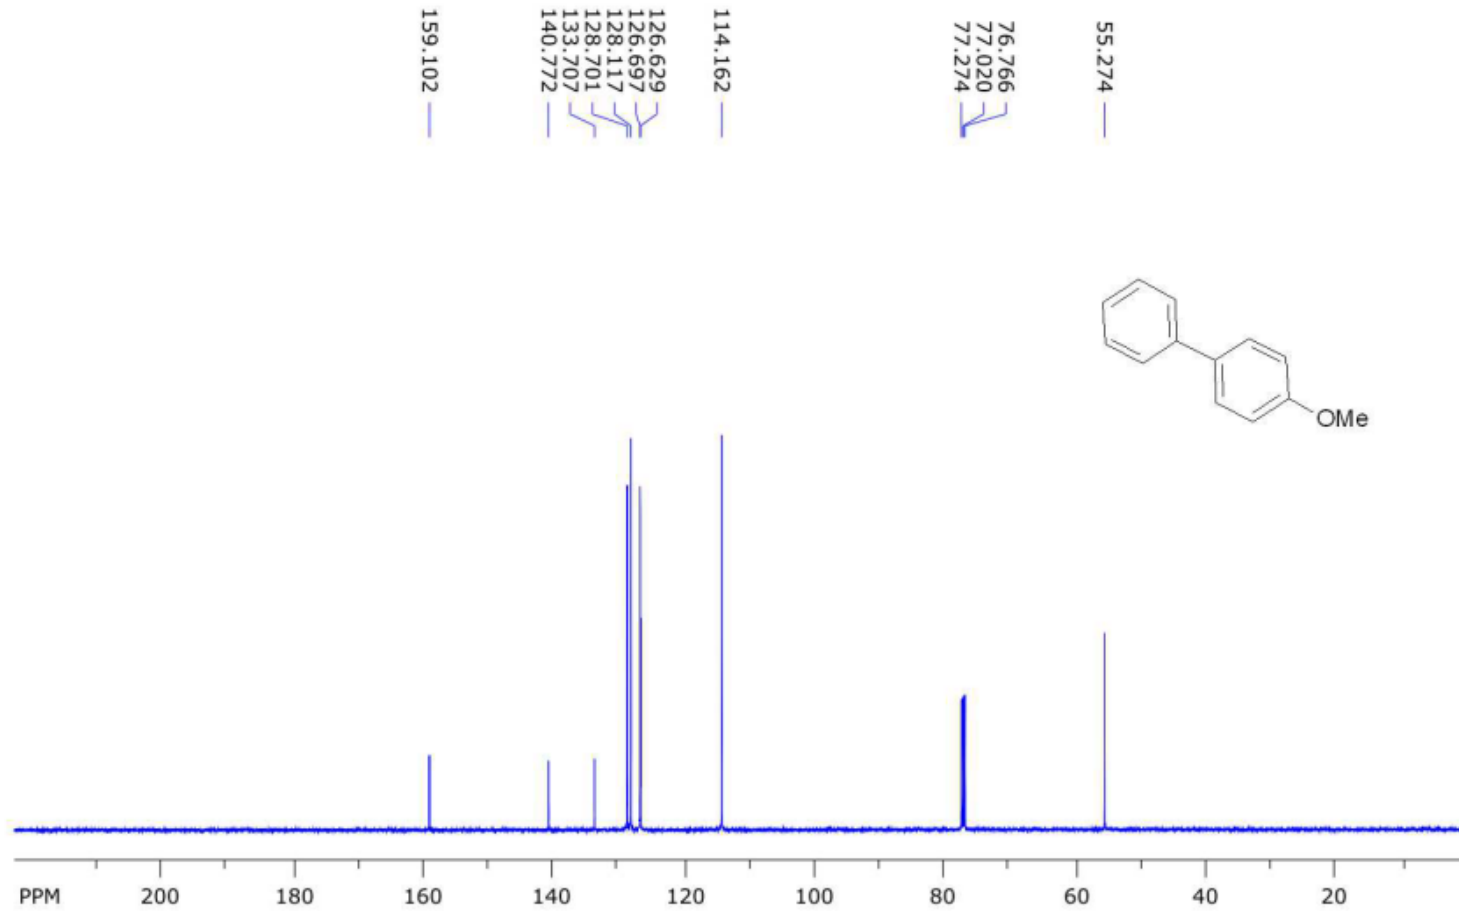

file: D:\NAPO\NMR\500-2\mkr23004\20\fid expt: <zgpg30>  
transmitter freq.: 125.772879 MHz  
time domain size: 65536 points  
width: 36057.69 Hz = 286.6889 ppm = 0.550197 Hz/pt  
number of scans: 512

freq. of 0 ppm: 125.757804 MHz  
processed size: 32768 complex points  
LB: 2.000 GF: 0.0000  
Hz/cm: 1124.809 ppm/cm: 8.94317

# Compound 2p

SpinWorks 4: SVS 97 1H CDCl3

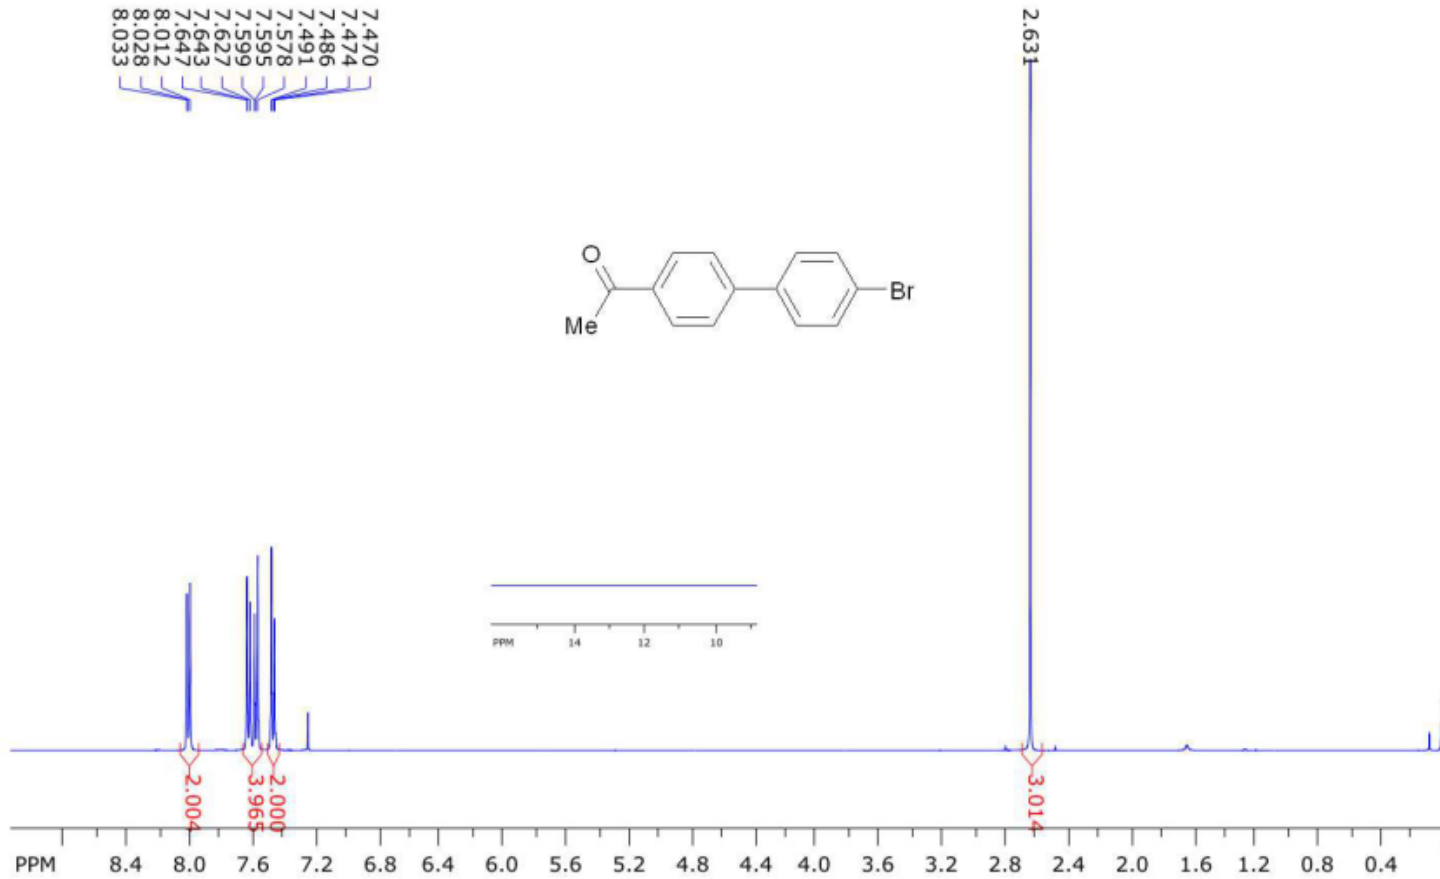

file: D:\NAPO\NMR\JELA\nmr\jn-S-97\1\fid expt: <zg30>  
transmitter freq.: 400.132471 MHz  
time domain size: 65536 points  
width: 8196.72 Hz = 20.4850 ppm = 0.125072 Hz/pt  
number of scans: 16

freq. of 0 ppm: 400.130010 MHz  
processed size: 65536 complex points  
LB: 0.300 GF: 0.0000  
Hz/cm: 147.614 ppm/cm: 0.36891

# Compound 2p

SpinWorks 4: SVS 97 13C CDCl3

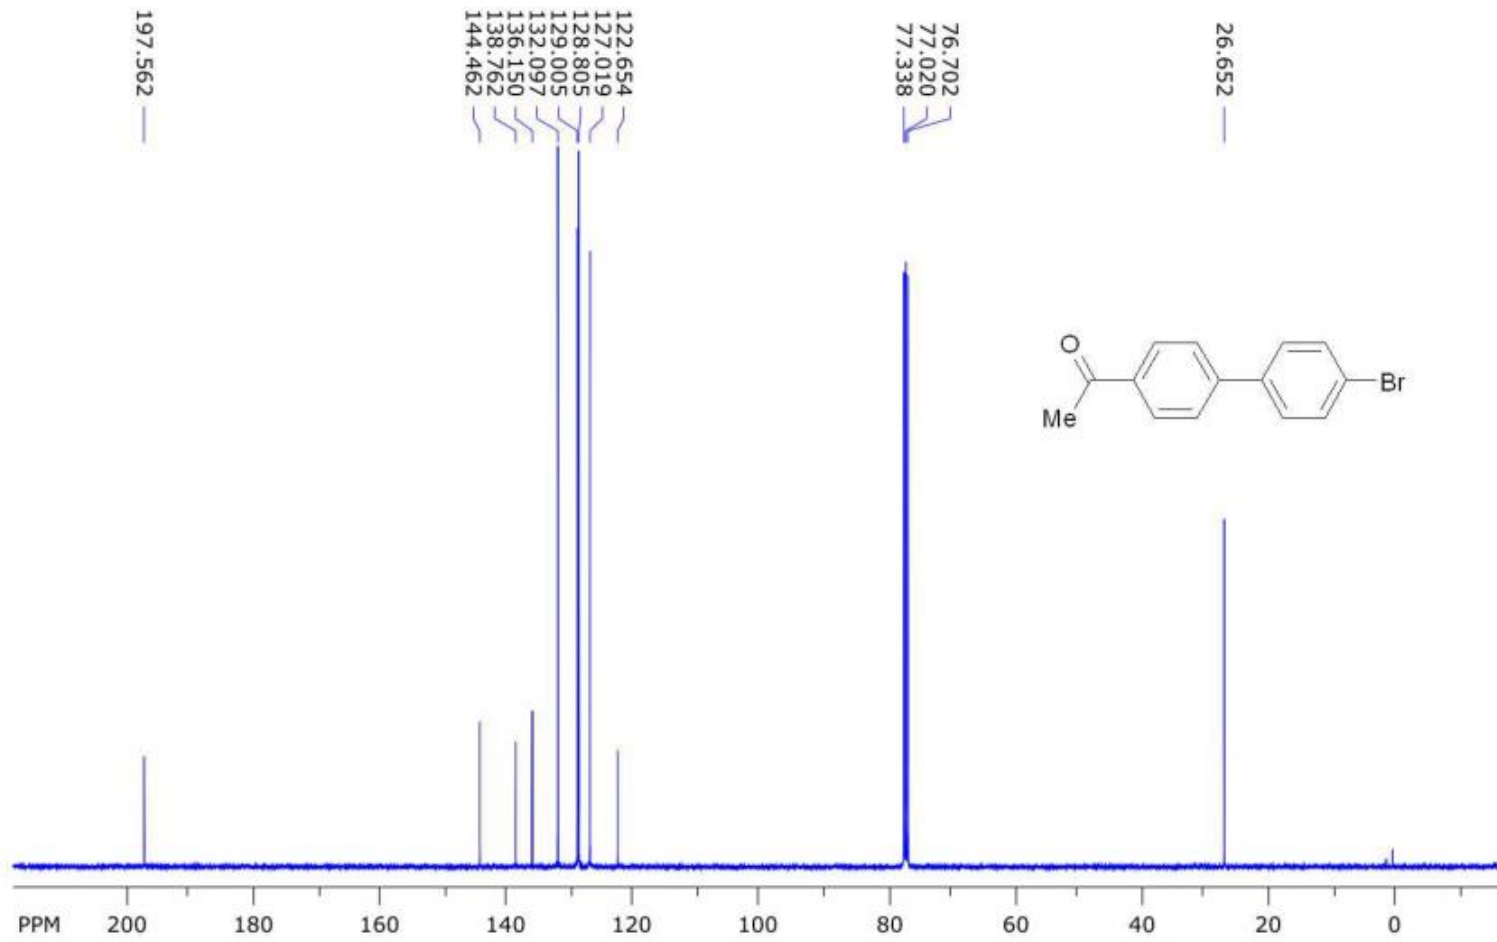

file: D:\NAPO\NMR\JELA\nmr\jn-S-97\2\fid expt: <zpgg30>  
transmitter freq.: 100.622830 MHz  
time domain size: 65536 points  
width: 23809.52 Hz = 236.6215 ppm = 0.363305 Hz/pt  
number of scans: 3500

freq. of 0 ppm: 100.612770 MHz  
processed size: 32768 complex points  
LB: 1.000 GF: 0.0000  
Hz/cm: 952.381 ppm/cm: 9.46486

# Compound 2q

SpinWorks 4: IVA 1410 1H DMSO

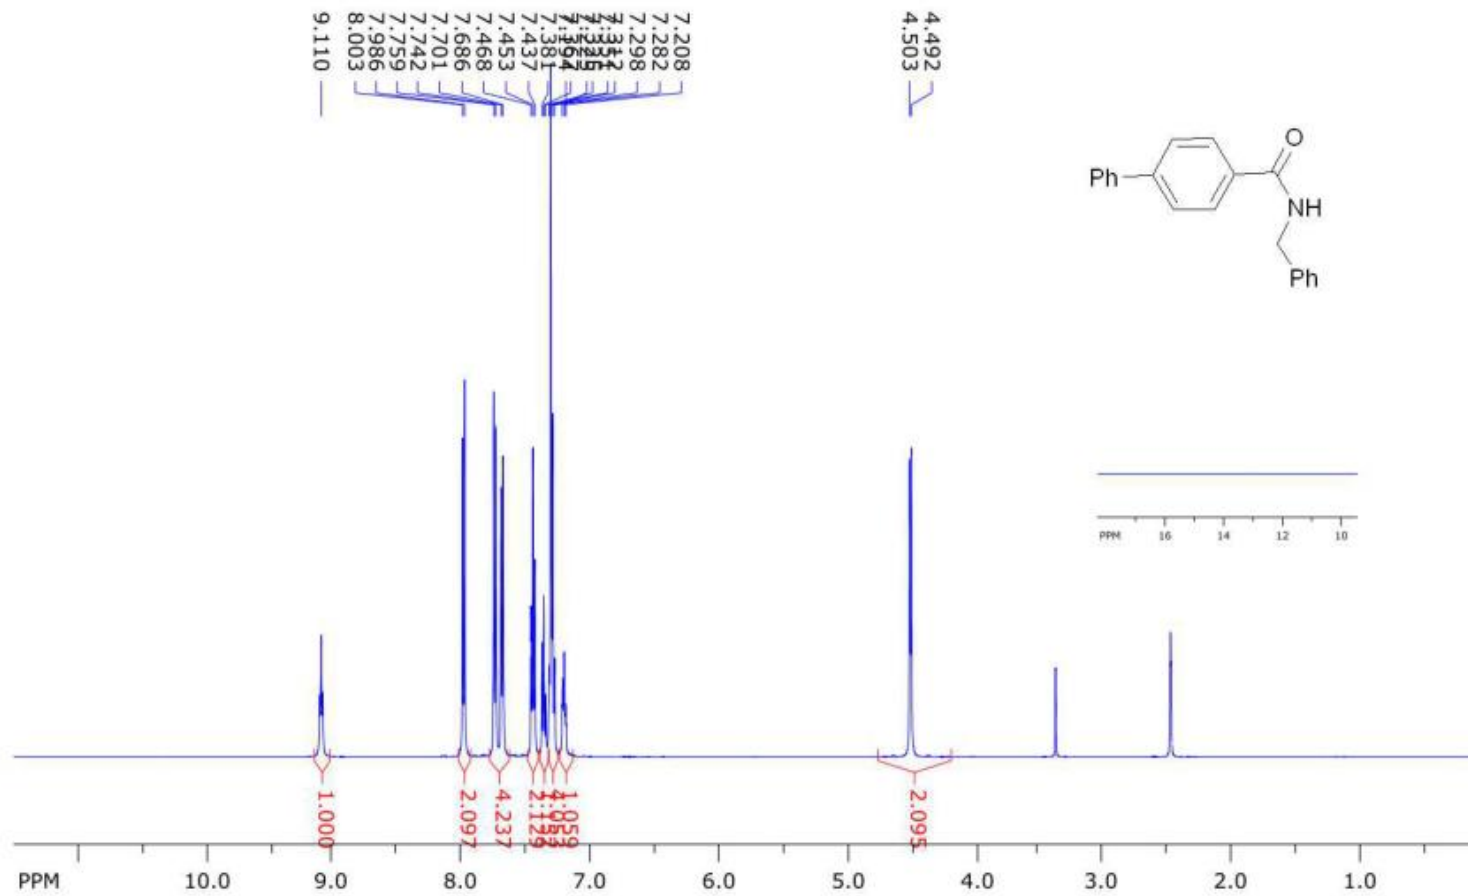

file: D:\NAPO\NMR\500-2\mkr20803\3\fid exp: <zg30>  
transmitter freq.: 500.133001 MHz  
time domain size: 65536 points  
width: 12335.53 Hz = 24.6645 ppm = 0.188225 Hz/pt  
number of scans: 24

freq. of 0 ppm: 500.130024 MHz  
processed size: 65536 complex points  
LB: 0.300 GF: 0.0000  
Hz/cm: 229.244 ppm/cm: 0.45837

# Compound 2q

SpinWorks 4: IVA 1410 13C DMSO

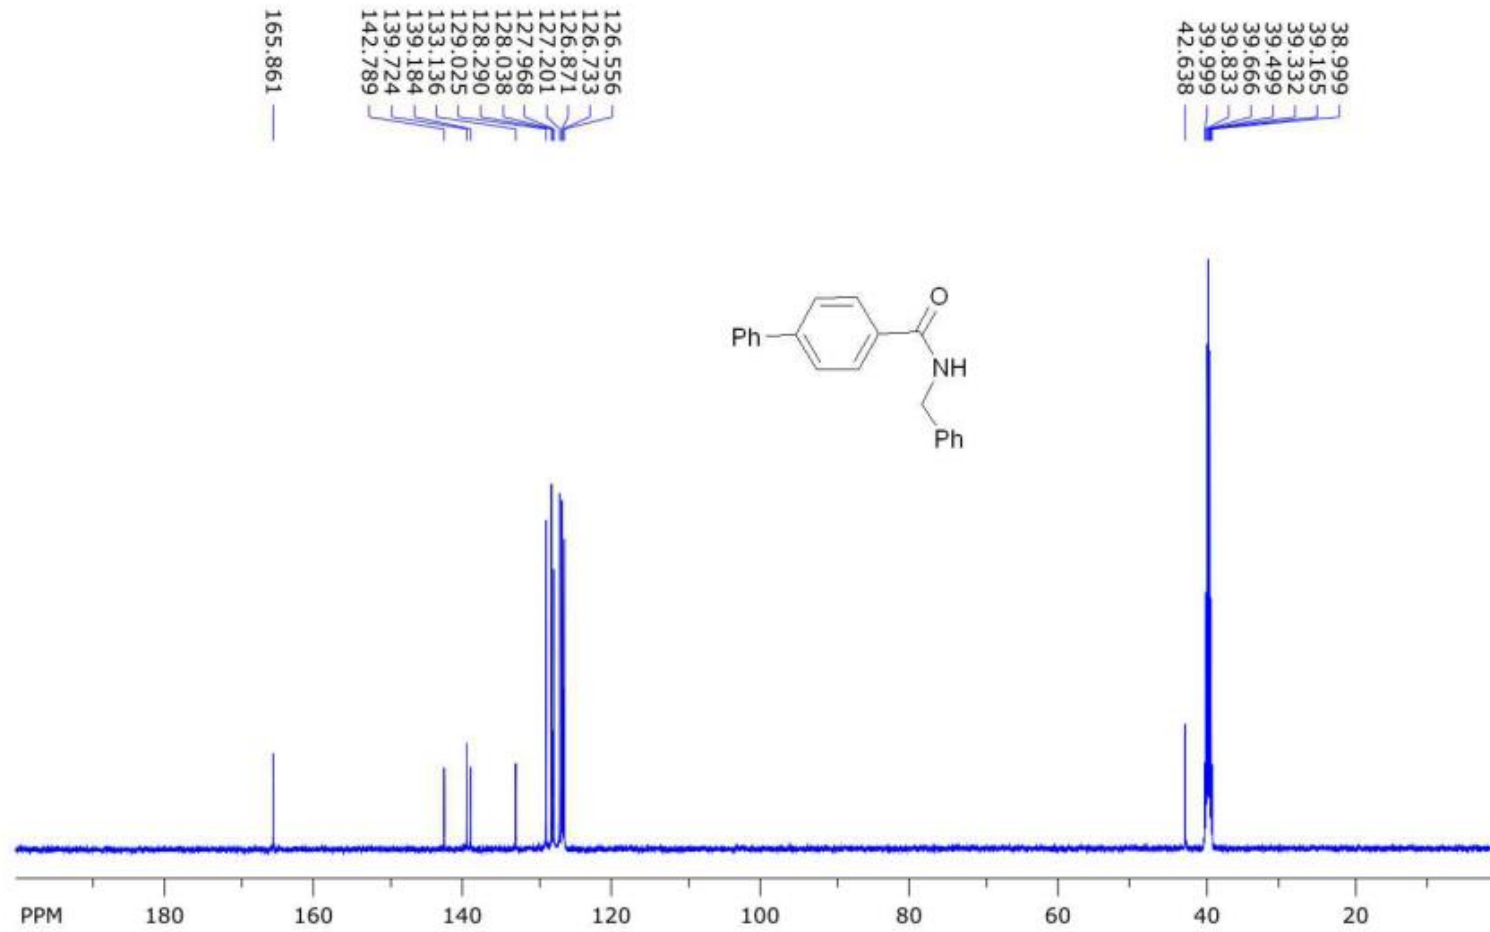

file: D:\NAPO\NMR\500-2\mkr20803\4\fid expt: <zgpg30>  
transmitter freq.: 125.772879 MHz  
time domain size: 65536 points  
width: 36057.69 Hz = 286.6889 ppm = 0.550197 Hz/pt  
number of scans: 512

freq. of 0 ppm: 125.757847 MHz  
processed size: 32768 complex points  
LB: 2.000 GF: 0.0000  
Hz/cm: 1008.339 ppm/cm: 8.01714

# Compound 2r

SpinWorks 4: IVA 2931 1H CDCL3

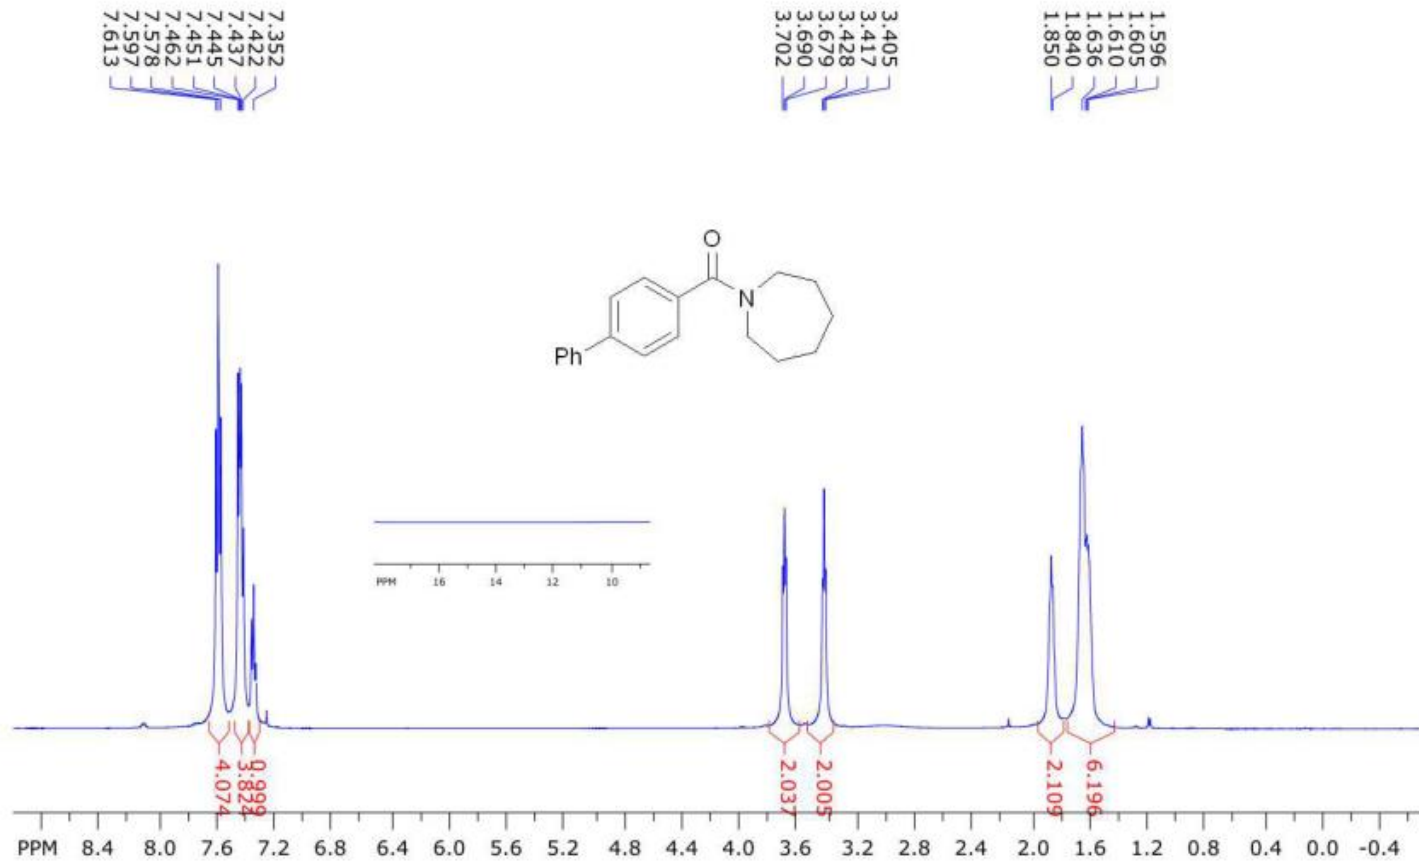

file: ...APO\NMR\500-2\mkr10706\21 2931\fid expt: <zg30>  
transmitter freq.: 500.133001 MHz  
time domain size: 65536 points  
width: 12335.53 Hz = 24.6645 ppm = 0.188225 Hz/pt  
number of scans: 24

freq. of 0 ppm: 500.130021 MHz  
processed size: 65536 complex points  
LB: 0.300 GF: 0.0000  
Hz/cm: 194.858 ppm/cm: 0.38961

# Compound 2r

SpinWorks 4: IVA 2931 13C CDCI3

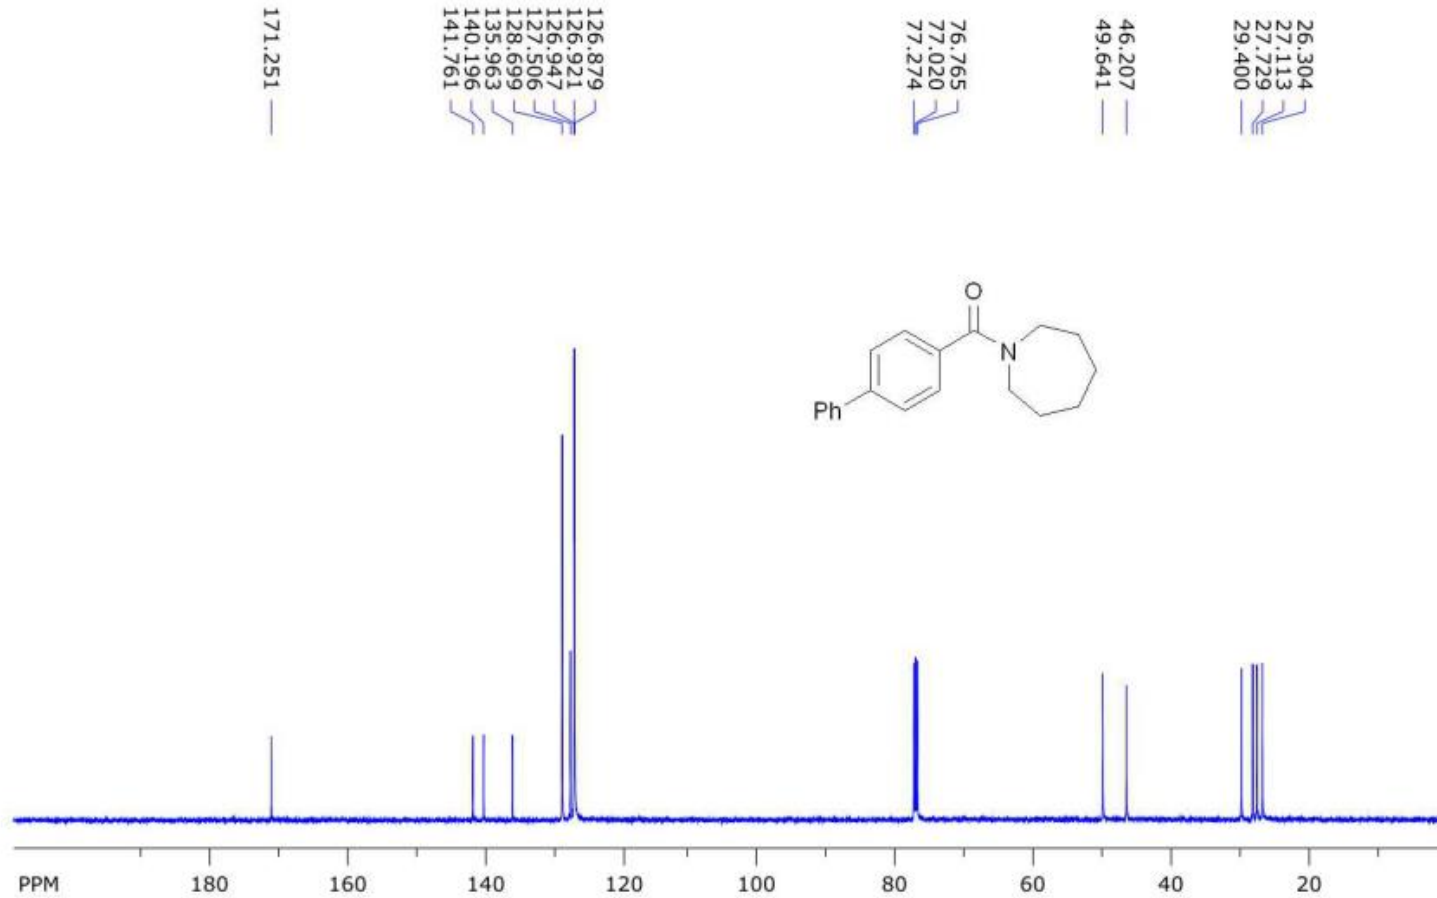

file: D:\NAPO\NMR\500-2\mkr10706\22\fid expt: <zpgg30>  
transmitter freq.: 125.772879 MHz  
time domain size: 65536 points  
width: 36057.69 Hz = 286.6889 ppm = 0.550197 Hz/pt  
number of scans: 512

freq. of 0 ppm: 125.757813 MHz  
processed size: 32768 complex points  
LB: 2.000 GF: 0.0000  
Hz/cm: 1054.608 ppm/cm: 8.38502



# Compound 2s

SpinWorks 4: IVAB 3272 1H DMSO

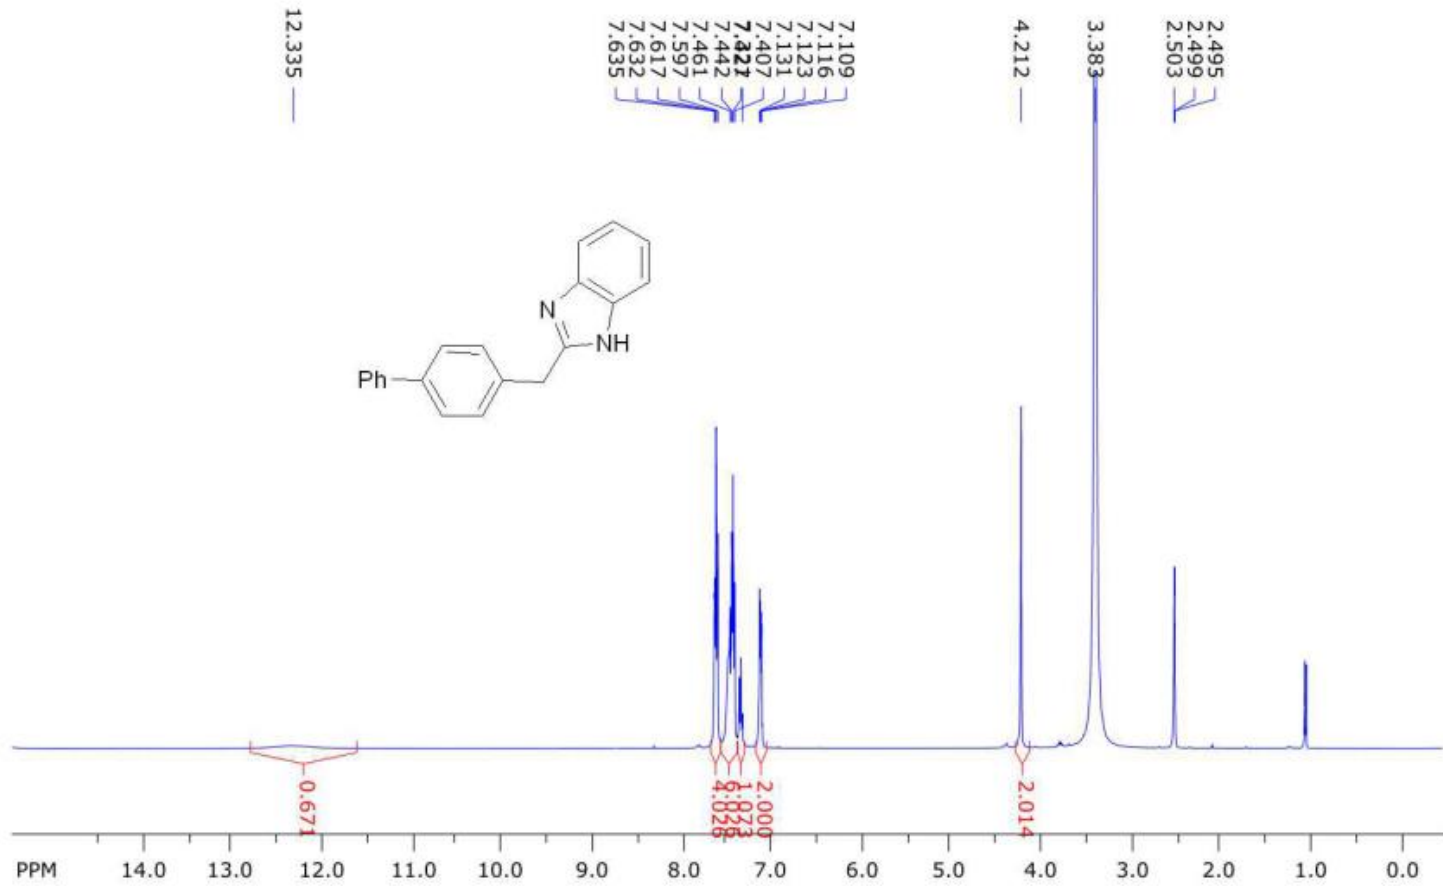

file: ...akia\19II2023FIDs\Ivab-3272\1H\fid expt: <zg30>  
transmitter freq.: 400.133001 MHz  
time domain size: 65536 points  
width: 6393.86 Hz = 15.9793 ppm = 0.097563 Hz/pt  
number of scans: 64

freq. of 0 ppm: 400.130003 MHz  
processed size: 65536 complex points  
LB: 0.300 GF: 0.0000  
Hz/cm: 255.754 ppm/cm: 0.63917

# Compound 2s

SpinWorks 4: IVABB 3272 13C DMSO

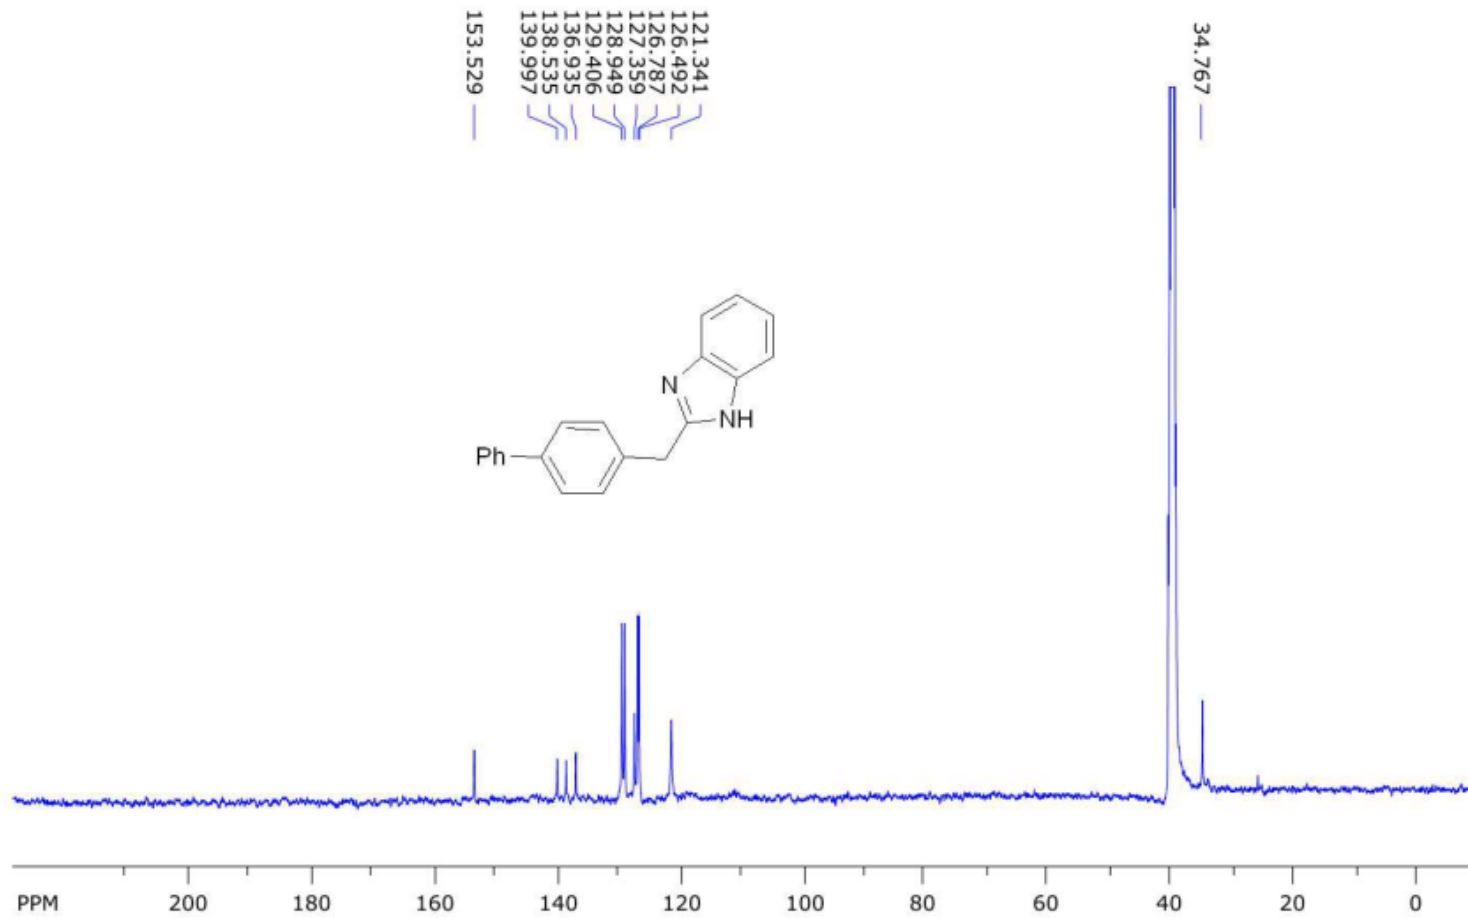

file: ...kia\19II2023FIDs\Ivab-3272\13C\fid expt: <zgpg30>  
transmitter freq.: 100.623836 MHz  
time domain size: 65536 points  
width: 24038.46 Hz = 238.8943 ppm = 0.366798 Hz/pt  
number of scans: 2135

freq. of 0 ppm: 100.612812 MHz  
processed size: 32768 complex points  
LB: 10.000 GF: 0.0000  
Hz/cm: 961.538 ppm/cm: 9.55577

# Compound 2t

SpinWorks 4: IVAB 3258 1H CDCI3

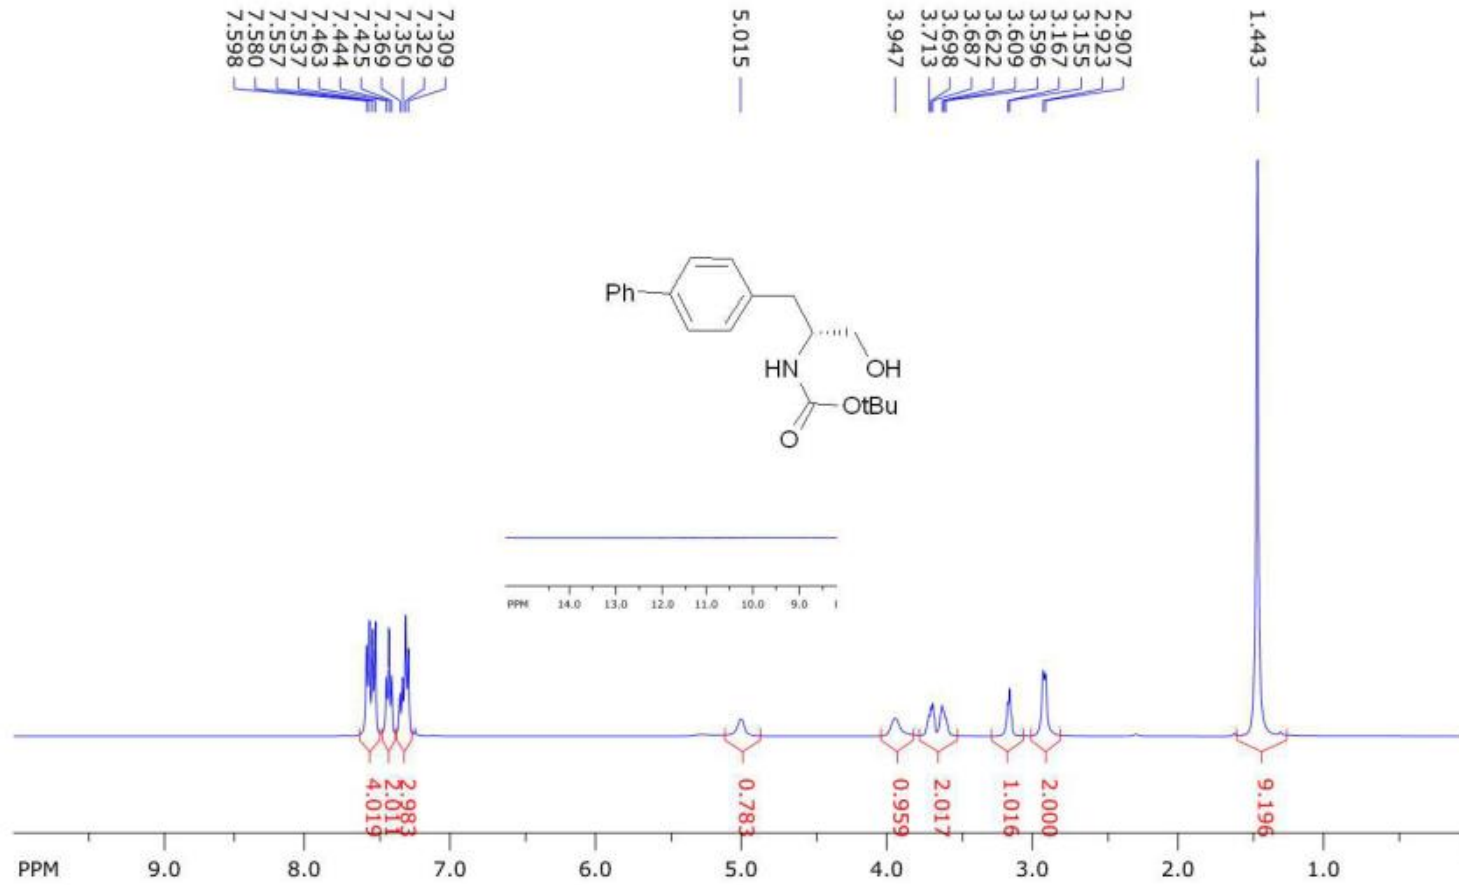

file: ...akia\19II2023FIDs\Ivab-3258\1H\fid expt: <zg30>  
 transmitter freq.: 400.133001 MHz  
 time domain size: 65536 points  
 width: 6393.86 Hz = 15.9793 ppm = 0.097563 Hz/pt  
 number of scans: 64

freq. of 0 ppm: 400.130008 MHz  
 processed size: 65536 complex points  
 LB: 0.300 GF: 0.0000  
 Hz/cm: 160.412 ppm/cm: 0.40090

# Compound 2t

SpinWorks 4: IVAB 3258 13C CDCI3

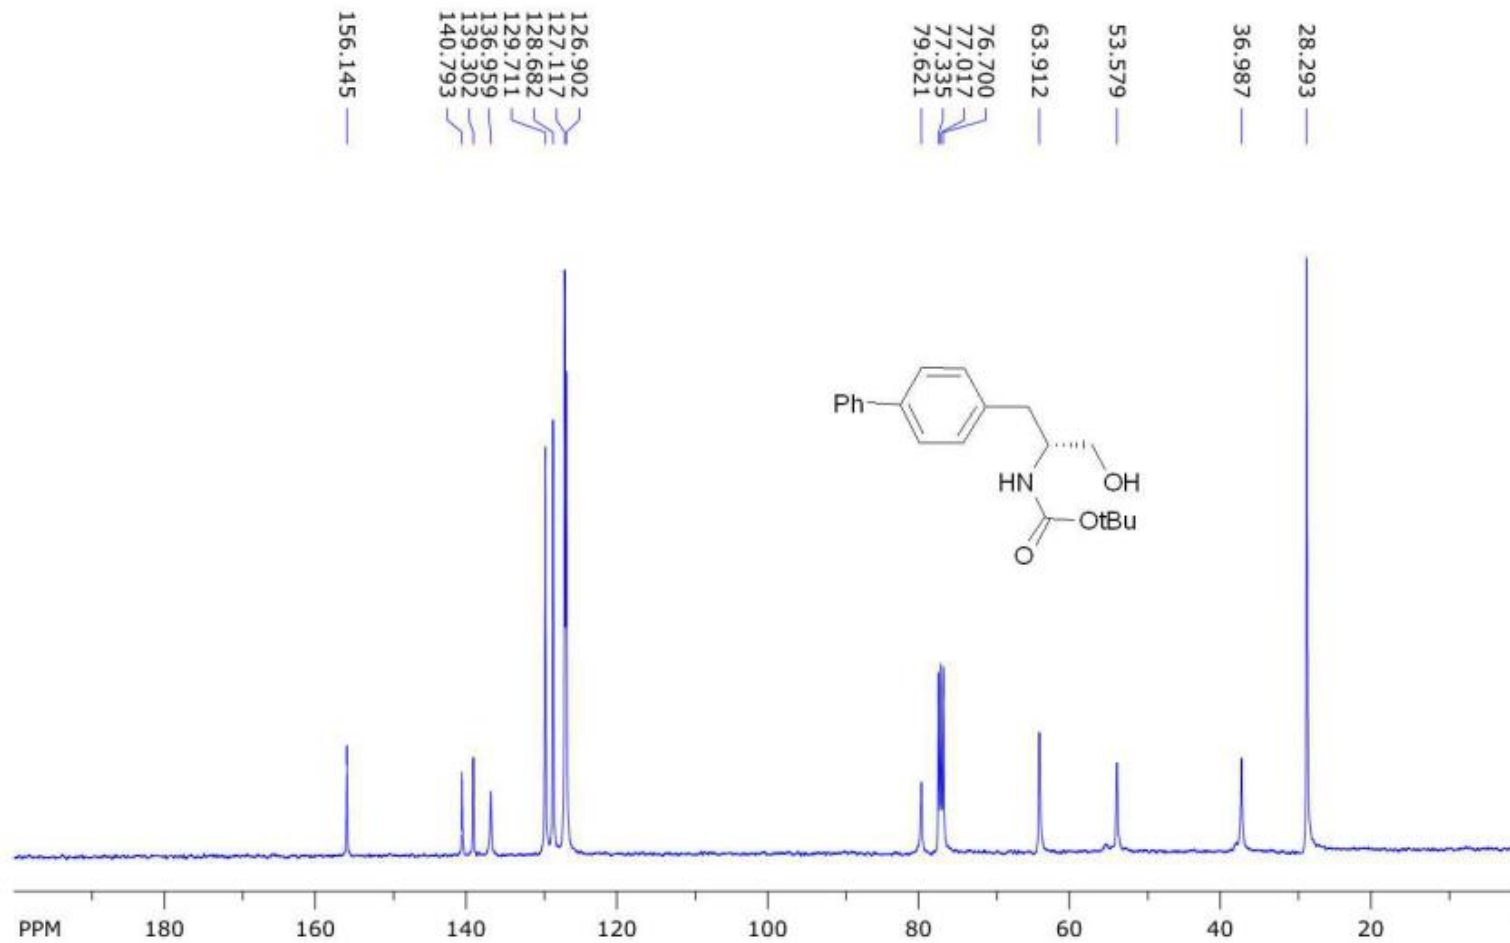

file: ...kia\19II2023FIDs\Ivab-3258\13C\fid expt: <zgpg30>  
transmitter freq.: 100.623836 MHz  
time domain size: 65536 points  
width: 24038.46 Hz = 238.8943 ppm = 0.366798 Hz/pt  
number of scans: 747

freq. of 0 ppm: 100.612780 MHz  
processed size: 32768 complex points  
LB: 10.000 GF: 0.0000  
Hz/cm: 805.182 ppm/cm: 8.00190

# Compound 2u

SpinWorks 4: IVAB 3249 1H CDCI3

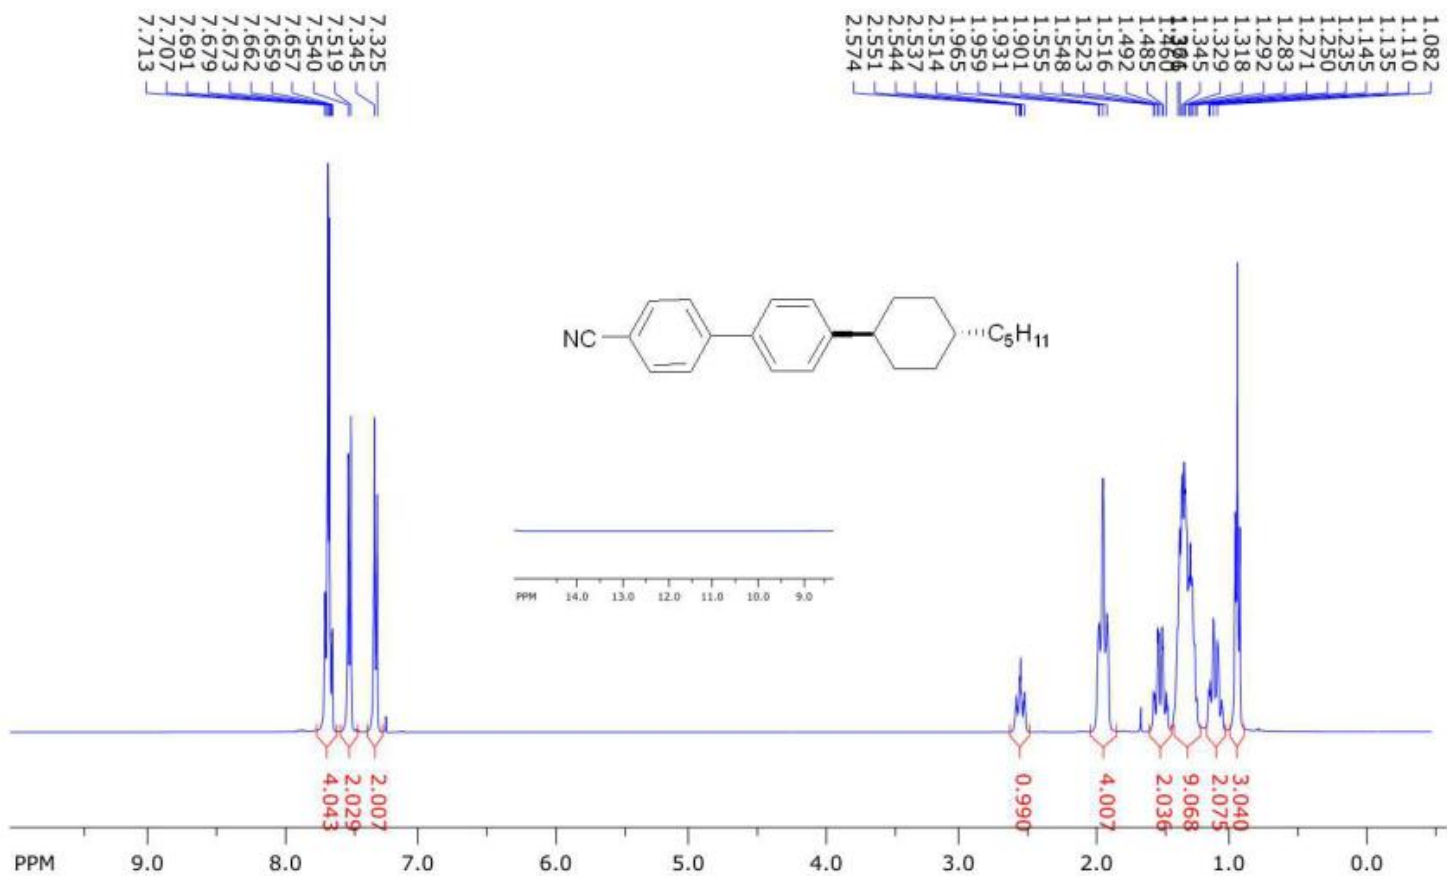

file: ...akia\19II2023FIDs\Ivab-3249\1H\fid expt: <zg30>  
 transmitter freq.: 400.133001 MHz  
 time domain size: 65536 points  
 width: 6393.86 Hz = 15.9793 ppm = 0.097563 Hz/pt  
 number of scans: 64

freq. of 0 ppm: 400.130010 MHz  
 processed size: 65536 complex points  
 LB: 0.300 GF: 0.0000  
 Hz/cm: 170.314 ppm/cm: 0.42564

# Compound 2u

SpinWorks 4: IVAB 3249 13C CDCl3

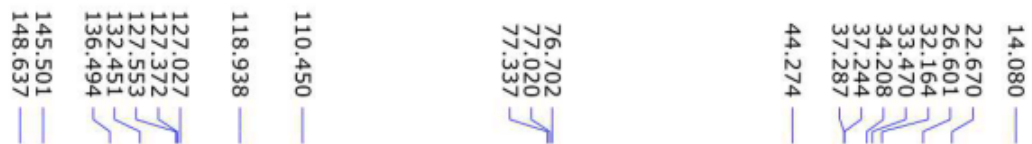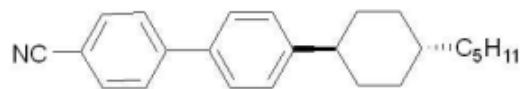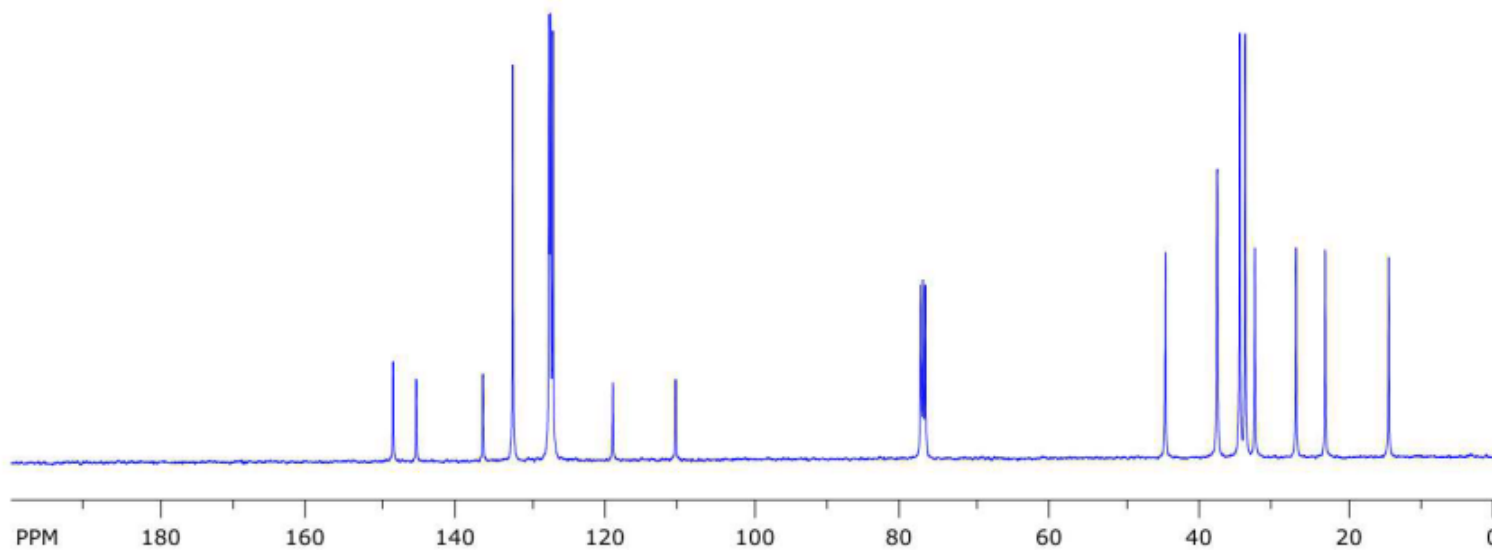

file: ...kia\19II2023FIDs\Ivab-3249\13C\fid expt: <zpgp30>  
transmitter freq.: 100.623836 MHz  
time domain size: 65536 points  
width: 24038.46 Hz = 238.8943 ppm = 0.366798 Hz/pt  
number of scans: 873

freq. of 0 ppm: 100.612779 MHz  
processed size: 32768 complex points  
LB: 10.000 GF: 0.0000  
Hz/cm: 812.628 ppm/cm: 8.07590



# Compound 2v

SpinWorks 4: IVA 1516 13C DMSO

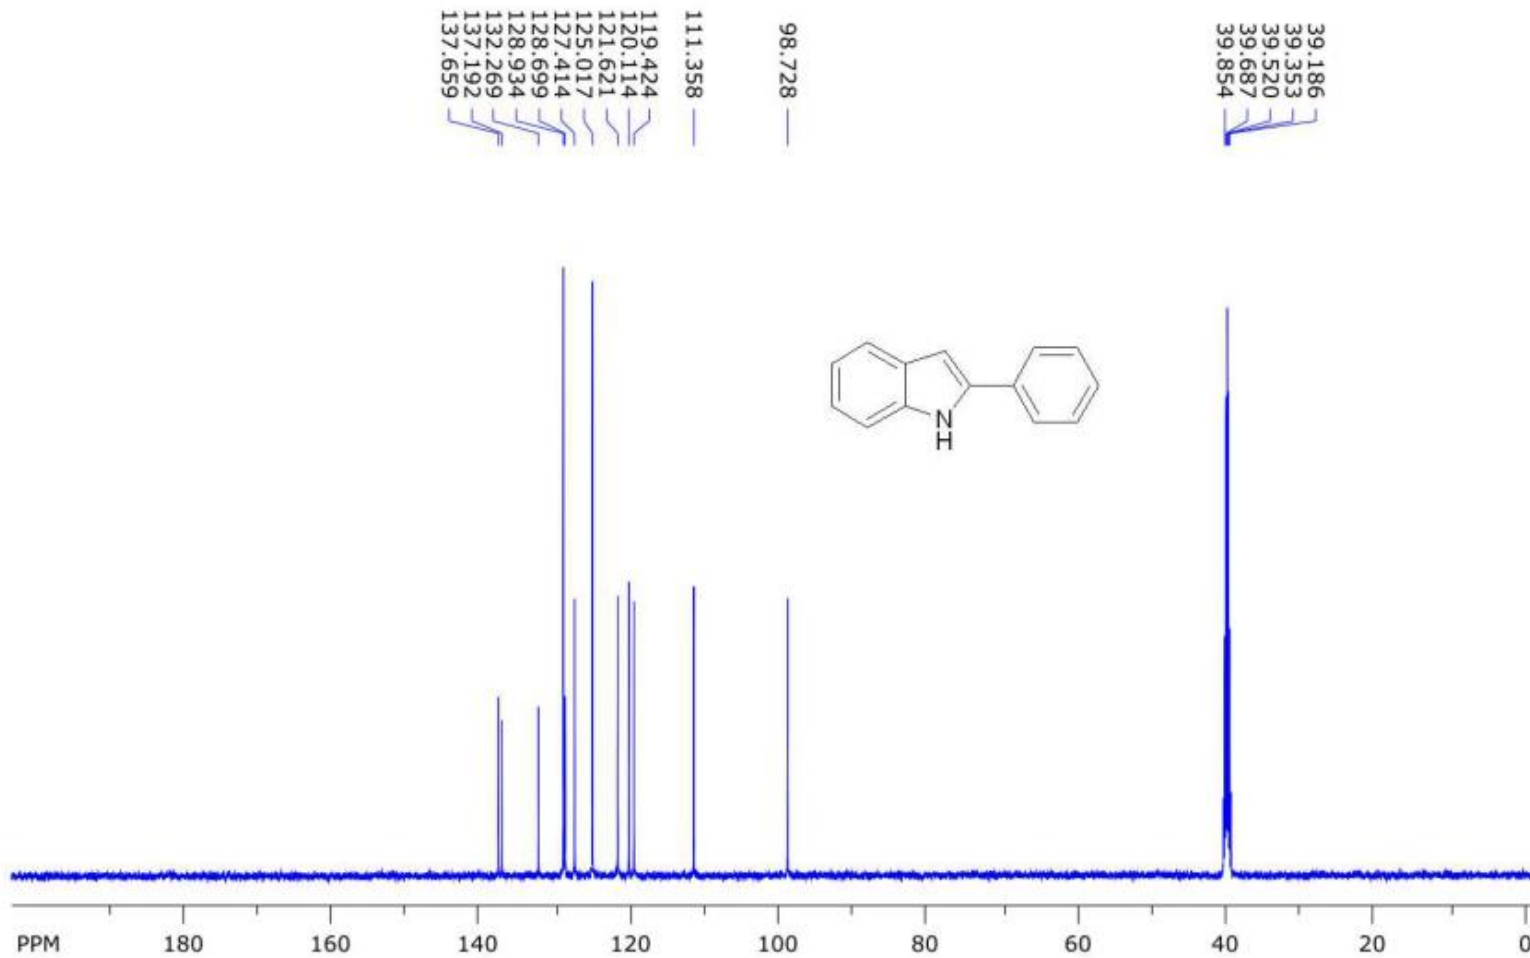

file: D:\NAPO\NMR\500-2\mkr11705\28\fid expt: <zggp30>  
transmitter freq.: 125.772879 MHz  
time domain size: 65536 points  
width: 36057.69 Hz = 286.6889 ppm = 0.550197 Hz/pt  
number of scans: 224

freq. of 0 ppm: 125.757843 MHz  
processed size: 32768 complex points  
LB: 2.000 GF: 0.0000  
Hz/cm: 1033.910 ppm/cm: 8.22045



# Compound 2w

SpinWorks 4: IVA 993-3 1H CDCl3

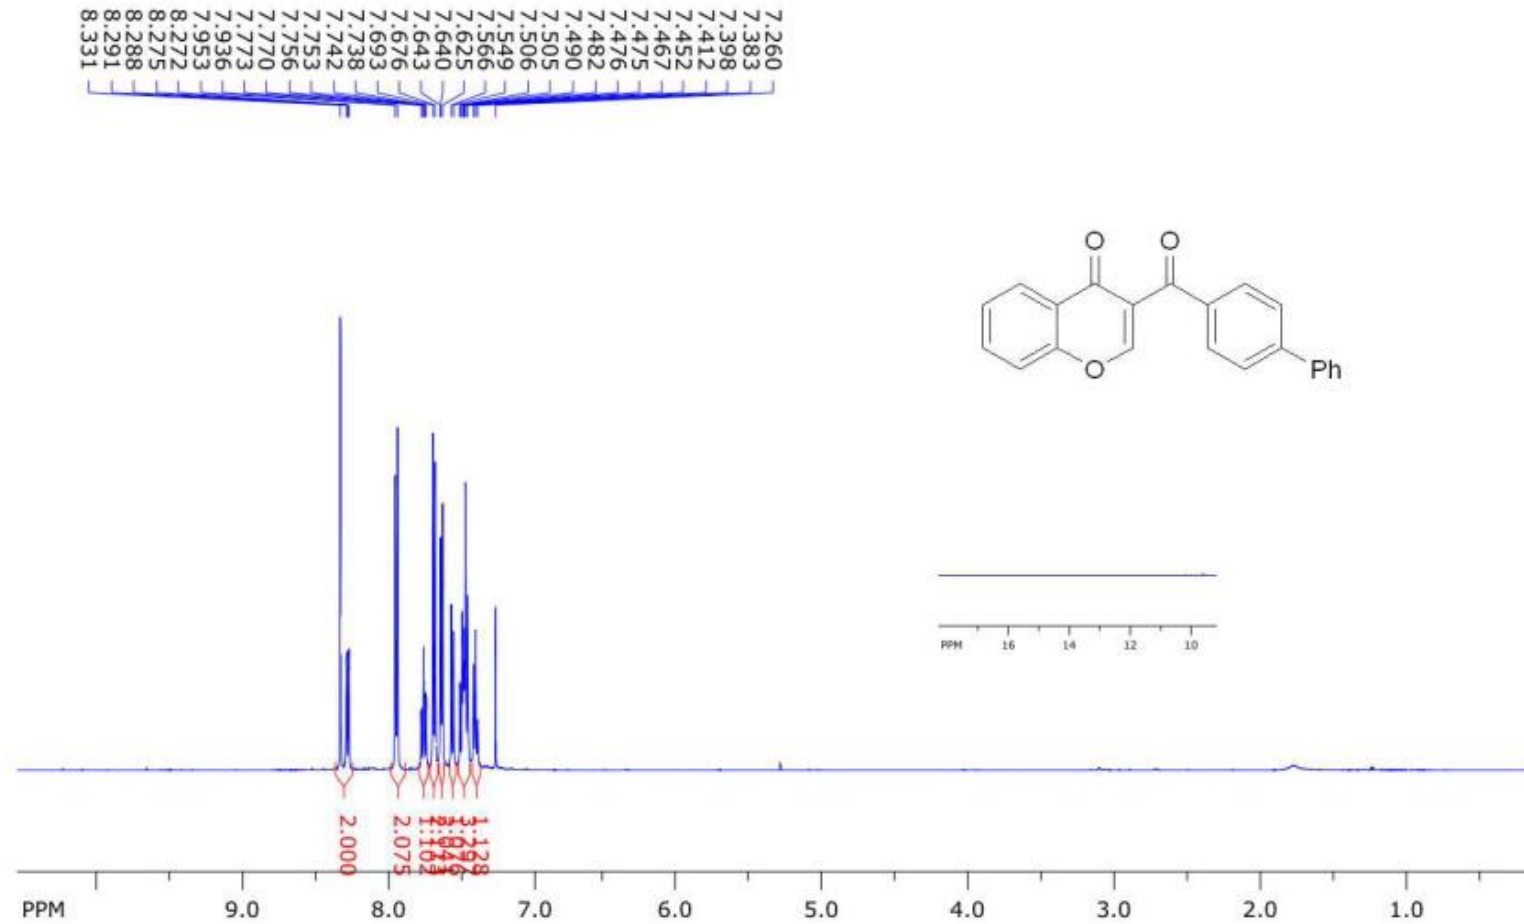

file: D:\NAPO\NMR\500-1\mkr10806\19\fid expt: <zg30>  
 transmitter freq.: 500.133001 MHz  
 time domain size: 65536 points  
 width: 12335.53 Hz = 24.6645 ppm = 0.188225 Hz/pt  
 number of scans: 24

freq. of 0 ppm: 500.130023 MHz  
 processed size: 65536 complex points  
 LB: 0.300 GF: 0.0000  
 Hz/cm: 209.595 ppm/cm: 0.41908

# Compound 2w

SpinWorks 4: IVA 993-3 13C CDCI3

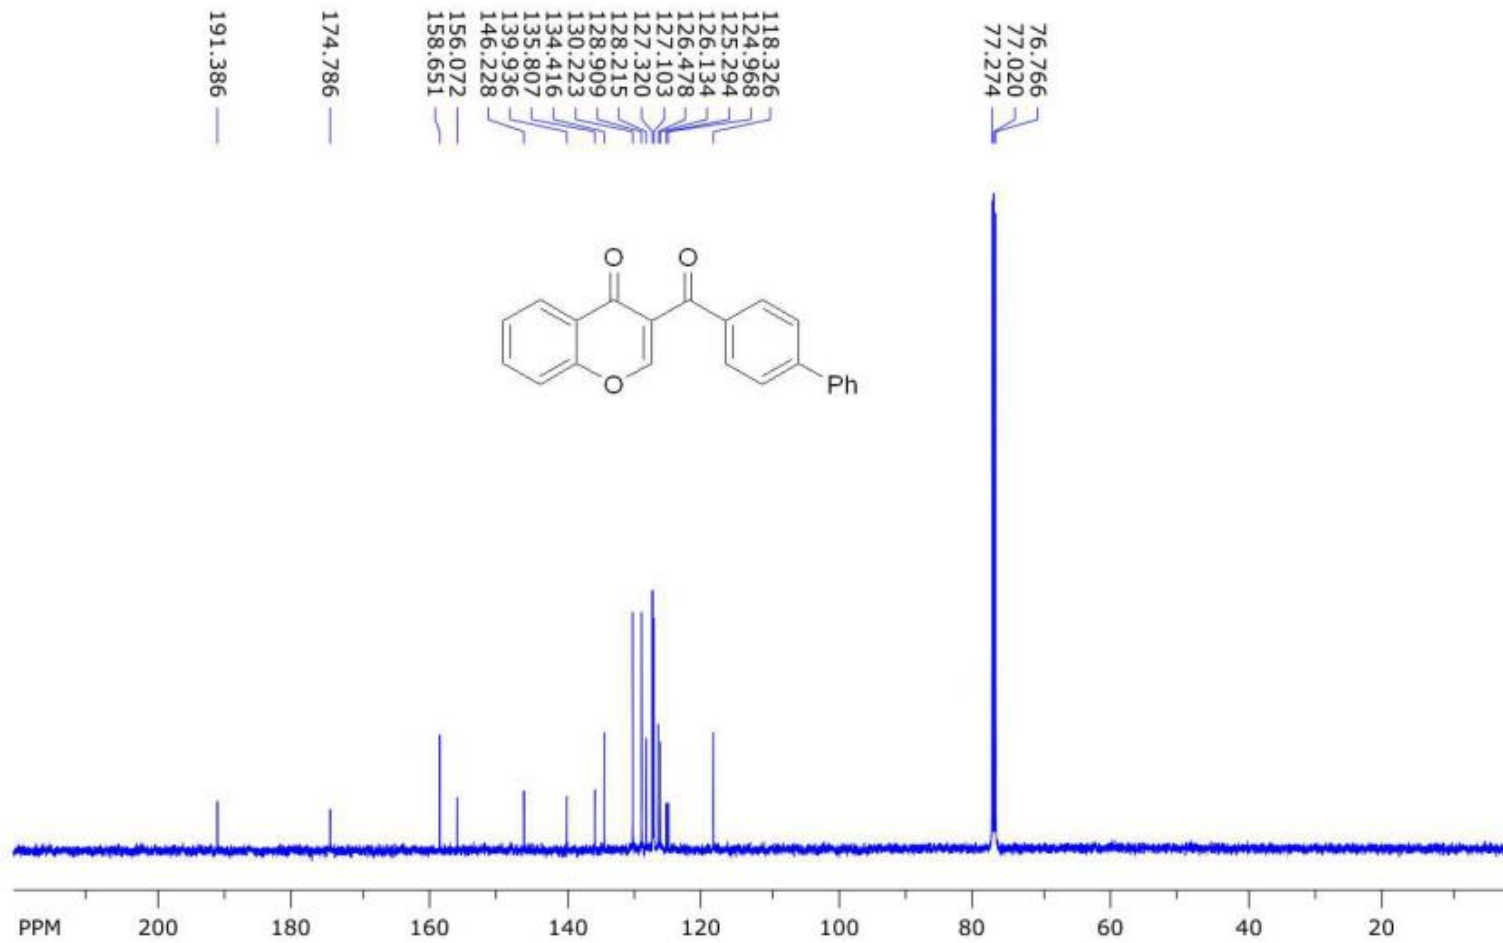

file: D:\NAPO\NMR\500-1\mkr10806\20\fid expt: <zpgg30>  
transmitter freq.: 125.772879 MHz  
time domain size: 65536 points  
width: 36057.69 Hz = 286.6889 ppm = 0.550197 Hz/pt  
number of scans: 512

freq. of 0 ppm: 125.757795 MHz  
processed size: 32768 complex points  
LB: 2.000 GF: 0.0000  
Hz/cm: 1112.045 ppm/cm: 8.84169

# Compound 2x

SpinWorks 4: IVA 1315 1H CDCI3

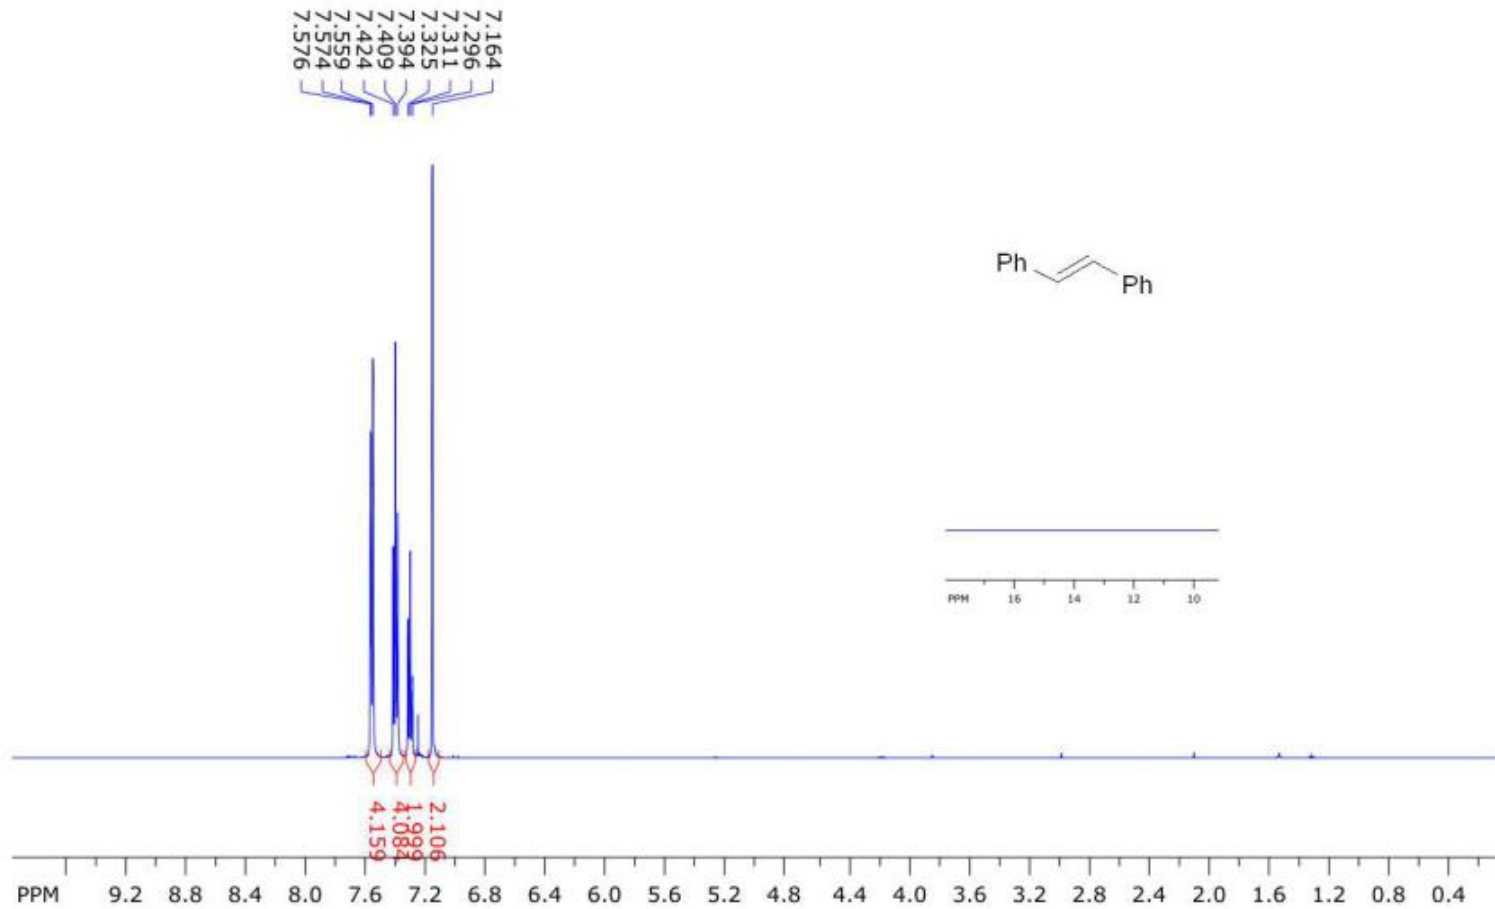

file: D:\NAPO\NMR\500-1\mkr11611\11\fid expt: <zg30>  
transmitter freq.: 500.133001 MHz  
time domain size: 65536 points  
width: 12335.53 Hz = 24.6645 ppm = 0.188225 Hz/pt  
number of scans: 24

freq. of 0 ppm: 500.130023 MHz  
processed size: 65536 complex points  
LB: 0.300 GF: 0.0000  
Hz/cm: 198.678 ppm/cm: 0.39725

# Compound 2x

SpinWorks 4: IVA 1315 13C CDCl3

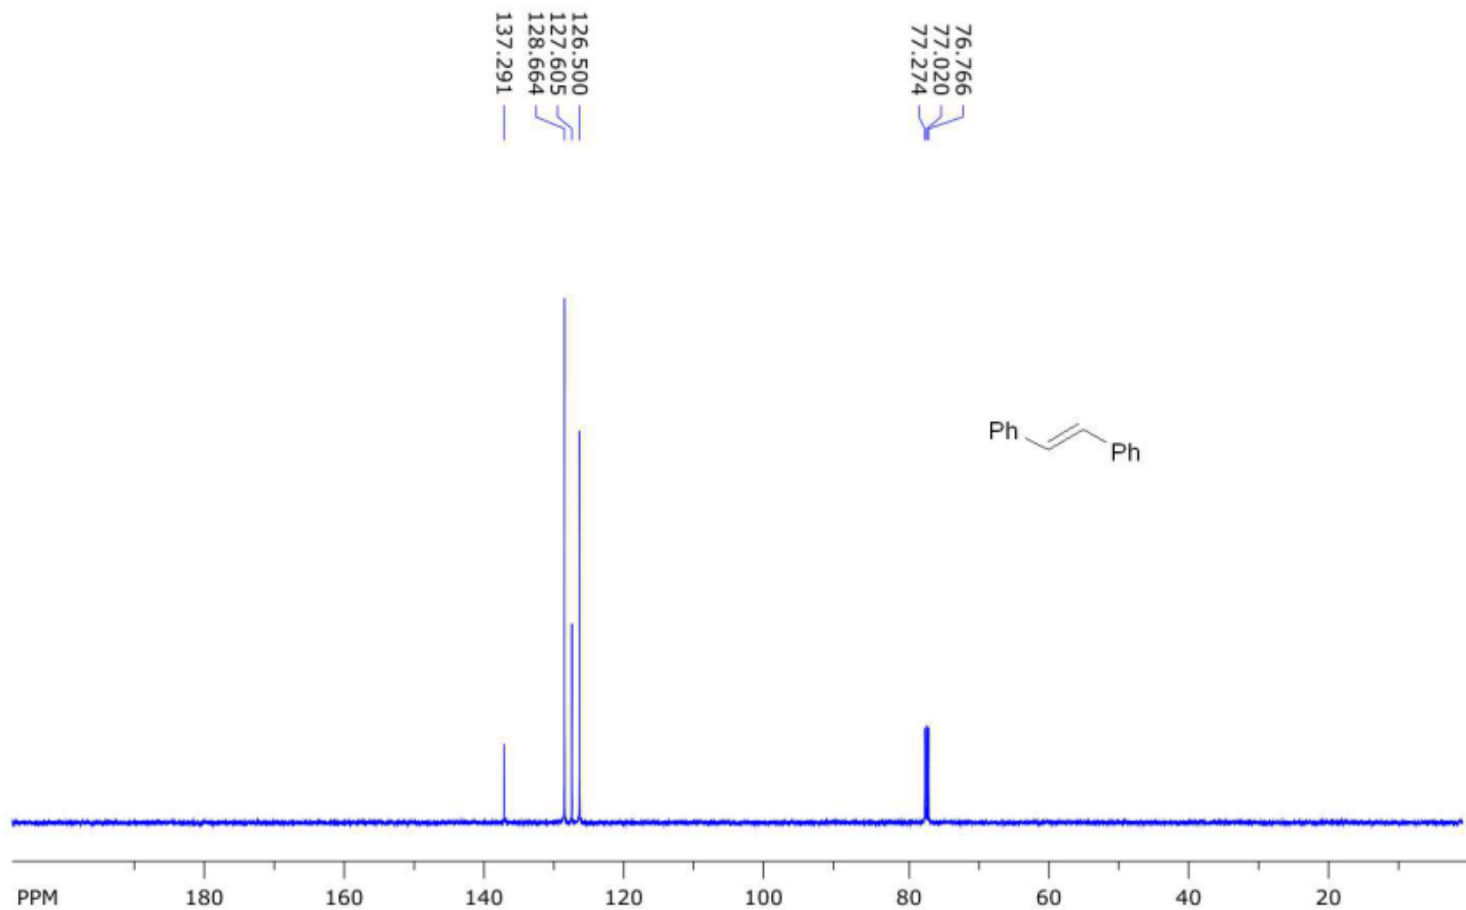

file: D:\NAPO\NMR\500-1\mkr11611\12\fid expt: <zggp30>  
transmitter freq.: 125.772879 MHz  
time domain size: 65536 points  
width: 36057.69 Hz = 286.6889 ppm = 0.550197 Hz/pt  
number of scans: 128

freq. of 0 ppm: 125.757801 MHz  
processed size: 32768 complex points  
LB: 2.000 GF: 0.0000  
Hz/cm: 1040.248 ppm/cm: 8.27085

# Compound 2y

SpinWorks 4: IVA 1292 1H CDCl3

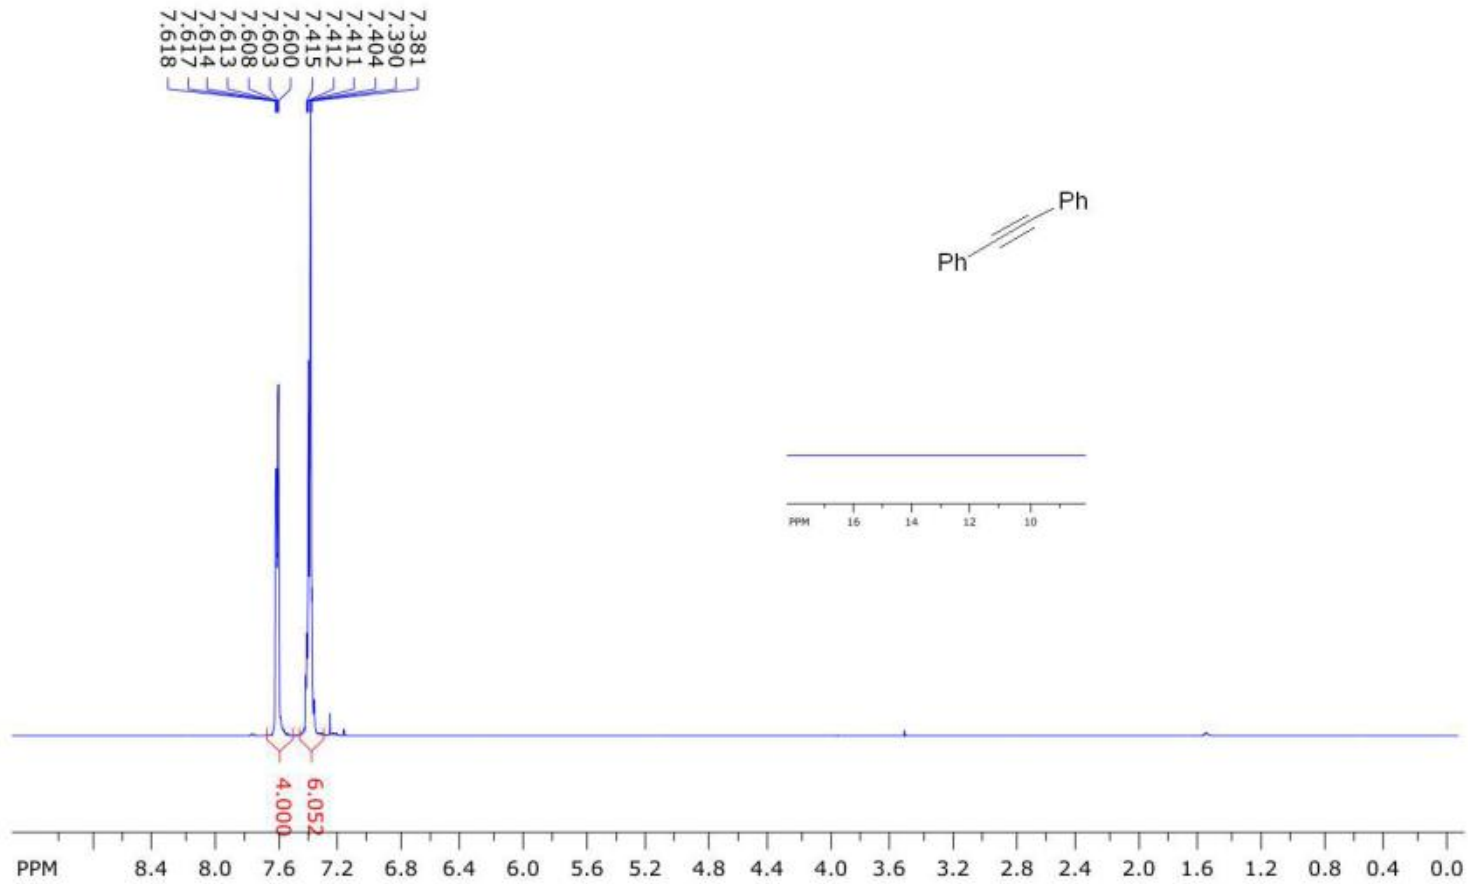

file: D:\NAPO\NMR\500-1\mkr10911\45\fid expt: <zg30>  
transmitter freq.: 500.133001 MHz  
time domain size: 65536 points  
width: 12335.53 Hz = 24.6645 ppm = 0.188225 Hz/pt  
number of scans: 24

freq. of 0 ppm: 500.130022 MHz  
processed size: 65536 complex points  
LB: 0.300 GF: 0.0000  
Hz/cm: 188.854 ppm/cm: 0.37761

# Compound 2y

SpinWorks 4: IVA 1292 13C CDCl3

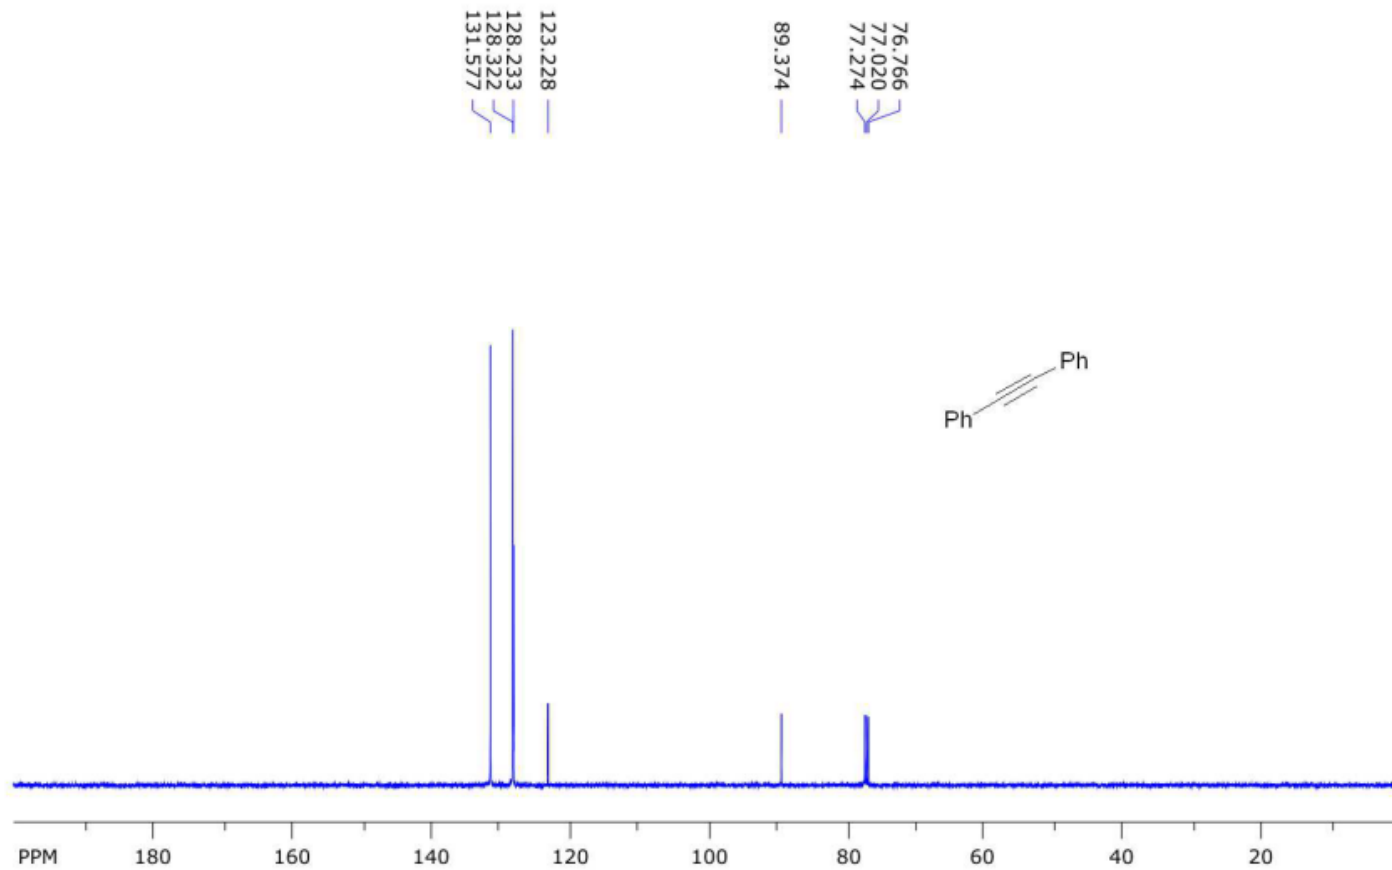

file: D:\NAPO\NMR\500-1\mkr10911\46\fid expt: <zggp30>  
transmitter freq.: 125.772879 MHz  
time domain size: 65536 points  
width: 36057.69 Hz = 286.6889 ppm = 0.550197 Hz/pt  
number of scans: 64

freq. of 0 ppm: 125.757805 MHz  
processed size: 32768 complex points  
LB: 2.000 GF: 0.0000  
Hz/cm: 1011.530 ppm/cm: 8.04251

# Compound 2z

SpinWorks 4: IVA 1293 1H CDCL3

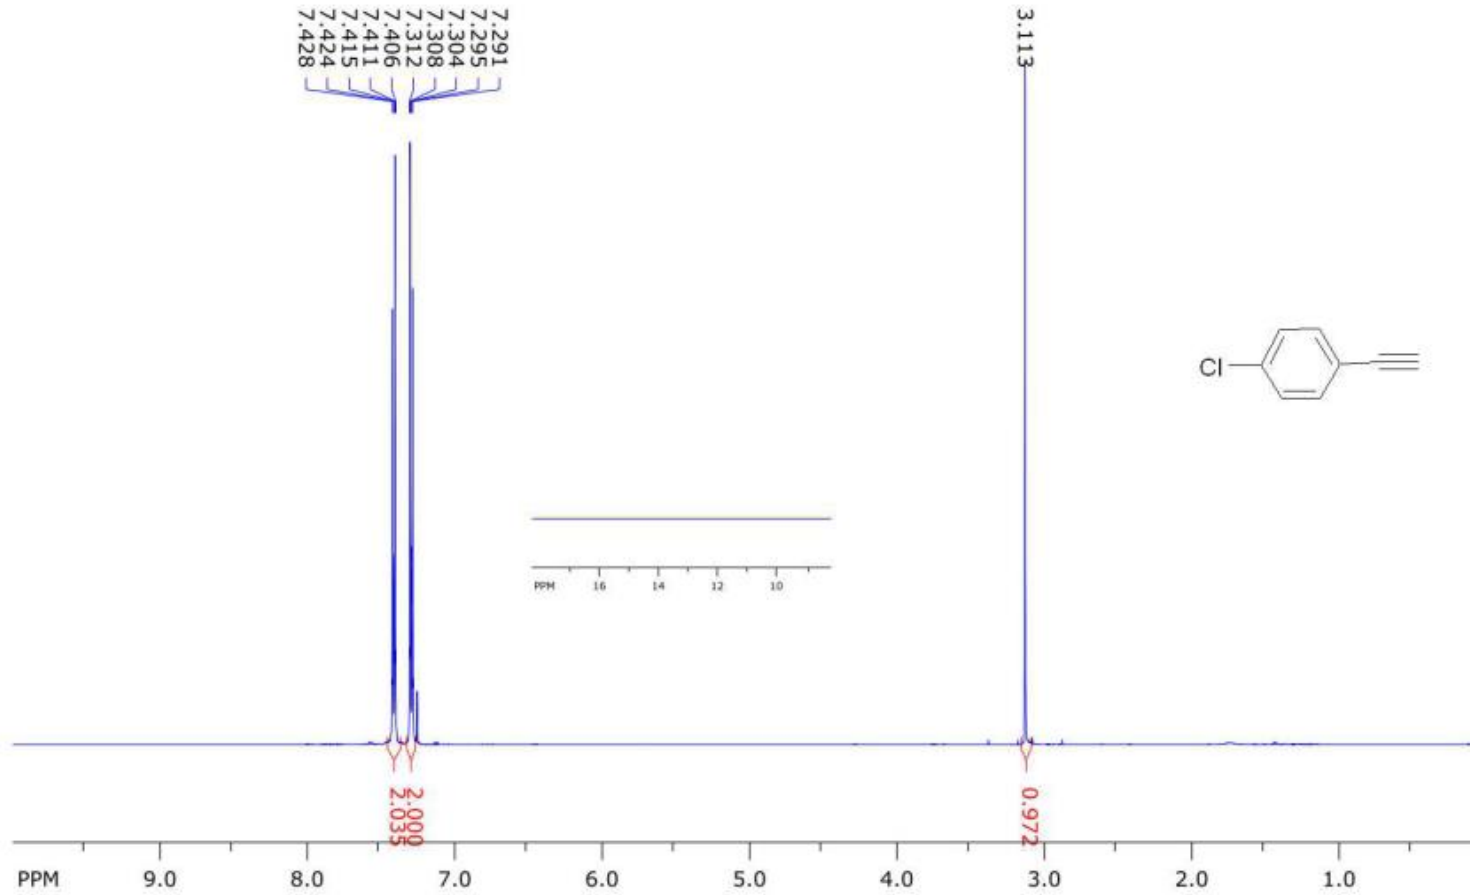

file: D:\NAPO\NMR\500-1\mkr10911\27\fid expt: <zg30>  
transmitter freq.: 500.133001 MHz  
time domain size: 65536 points  
width: 12335.53 Hz = 24.6645 ppm = 0.188225 Hz/pt  
number of scans: 24

freq. of 0 ppm: 500.130023 MHz  
processed size: 65536 complex points  
LB: 0.300 GF: 0.0000  
Hz/cm: 200.316 ppm/cm: 0.40053

# Compound 2z

SpinWorks 4: IVA 1293 13C CDCI3

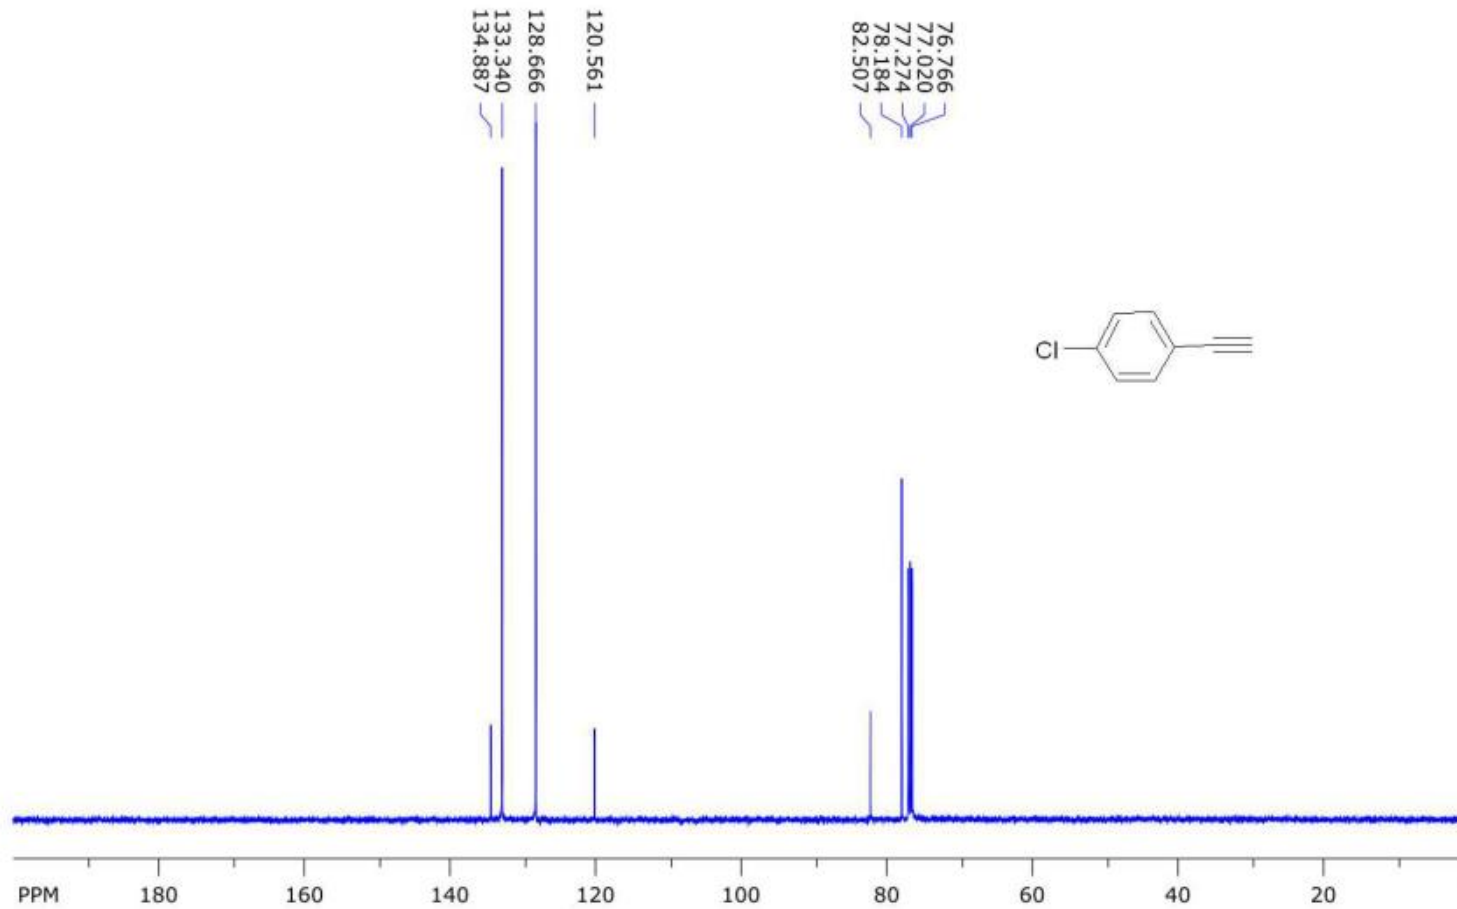

file: D:\NAPO\NMR\500-1\mkr10911\28\fid exp: <zpgg30>  
transmitter freq.: 125.772879 MHz  
time domain size: 65536 points  
width: 36057.69 Hz = 286.6889 ppm = 0.550197 Hz/pt  
number of scans: 512

freq. of 0 ppm: 125.757794 MHz  
processed size: 32768 complex points  
LB: 2.000 GF: 0.0000  
Hz/cm: 1006.744 ppm/cm: 8.00446



# Compound 6a

SpinWorks 4: SVS 230 1h CDCL3

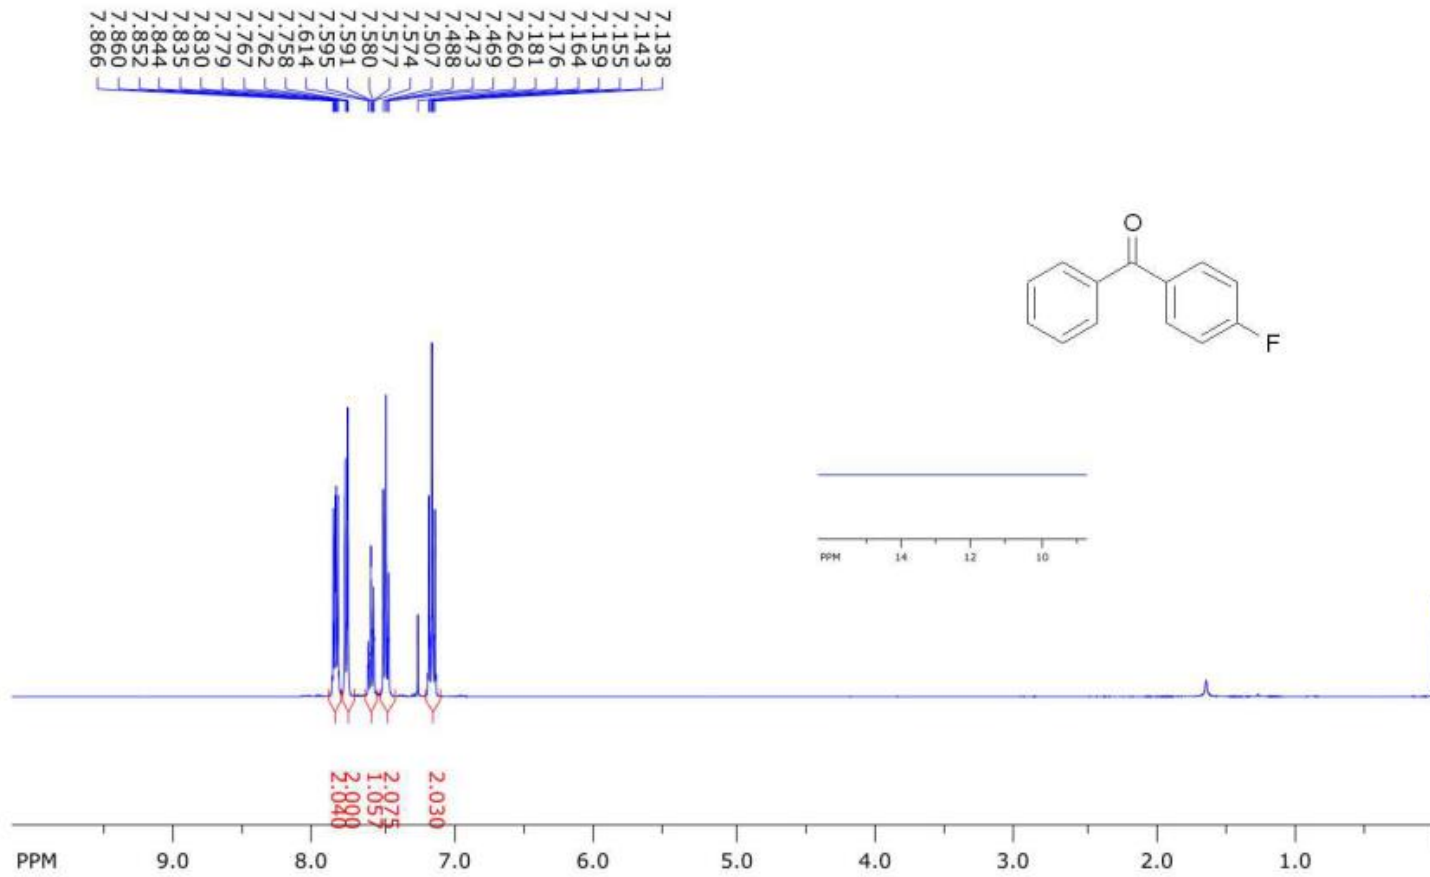

file: ...NAPO\NMR\JELA\nmr\jn-SM-S230\1\fid expt: <zg30>  
transmitter freq.: 400.132471 MHz  
time domain size: 65536 points  
width: 8196.72 Hz = 20.4850 ppm = 0.125072 Hz/pt  
number of scans: 16

freq. of 0 ppm: 400.130009 MHz  
processed size: 65536 complex points  
LB: 0.300 GF: 0.0000  
Hz/cm: 163.934 ppm/cm: 0.40970

# Compound 6a

SpinWorks 4: SVS 230 13C CDCL3

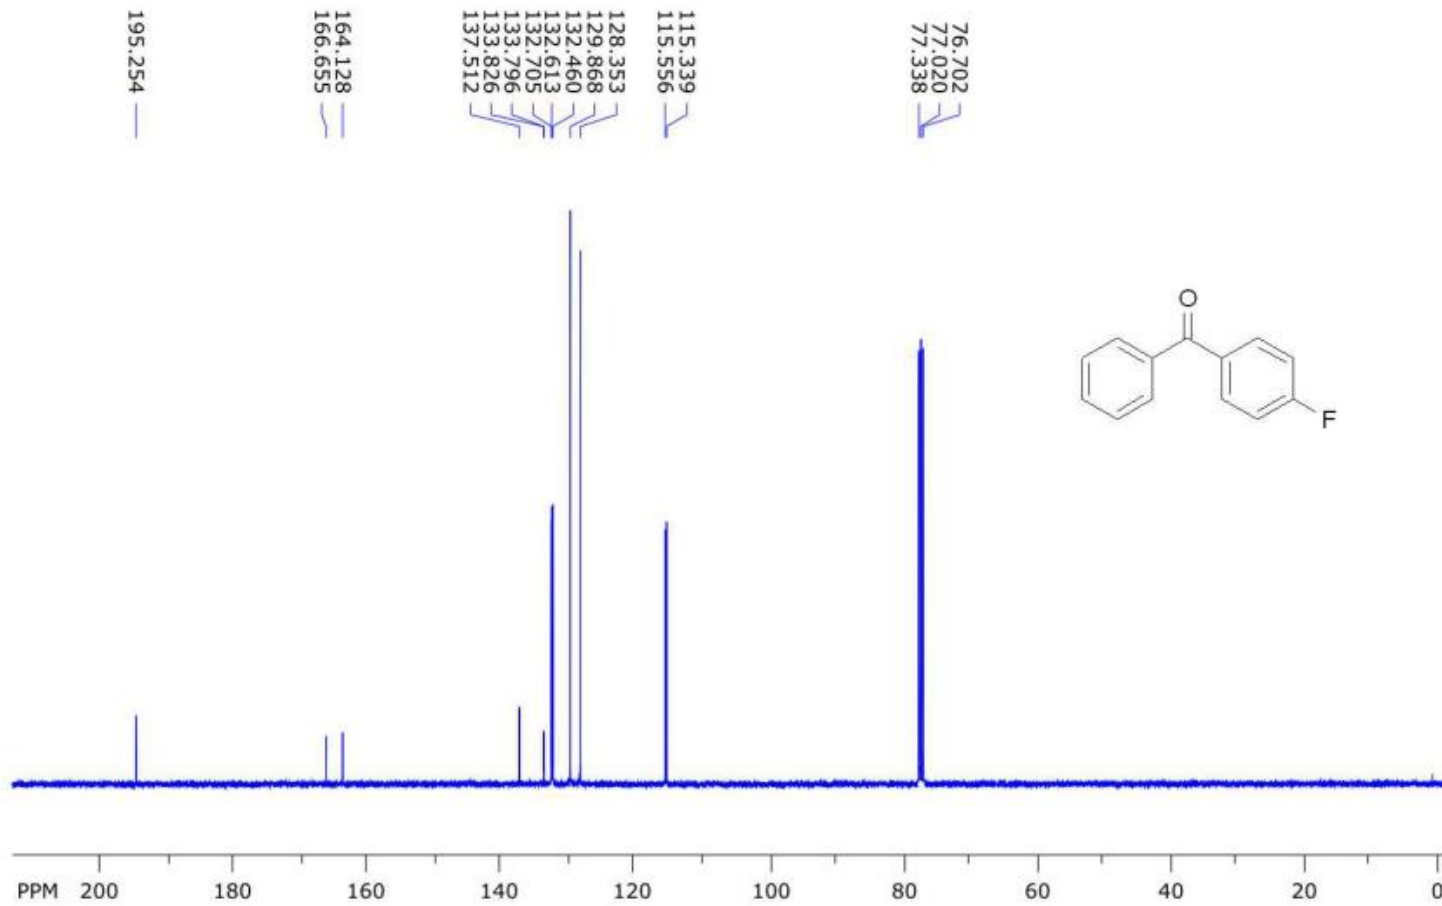

file: ...NAPO\NMR\JELA\nmr\jn-SM-S230\3\fid expt: <zgpg30>  
transmitter freq.: 100.622830 MHz  
time domain size: 65536 points  
width: 23809.52 Hz = 236.6215 ppm = 0.363305 Hz/pt  
number of scans: 381

freq. of 0 ppm: 100.612769 MHz  
processed size: 32768 complex points  
LB: 1.000 GF: 0.0000  
Hz/cm: 874.421 ppm/cm: 8.69008

# Compound 6b

SpinWorks 4: IVA 1596 1H DMSO

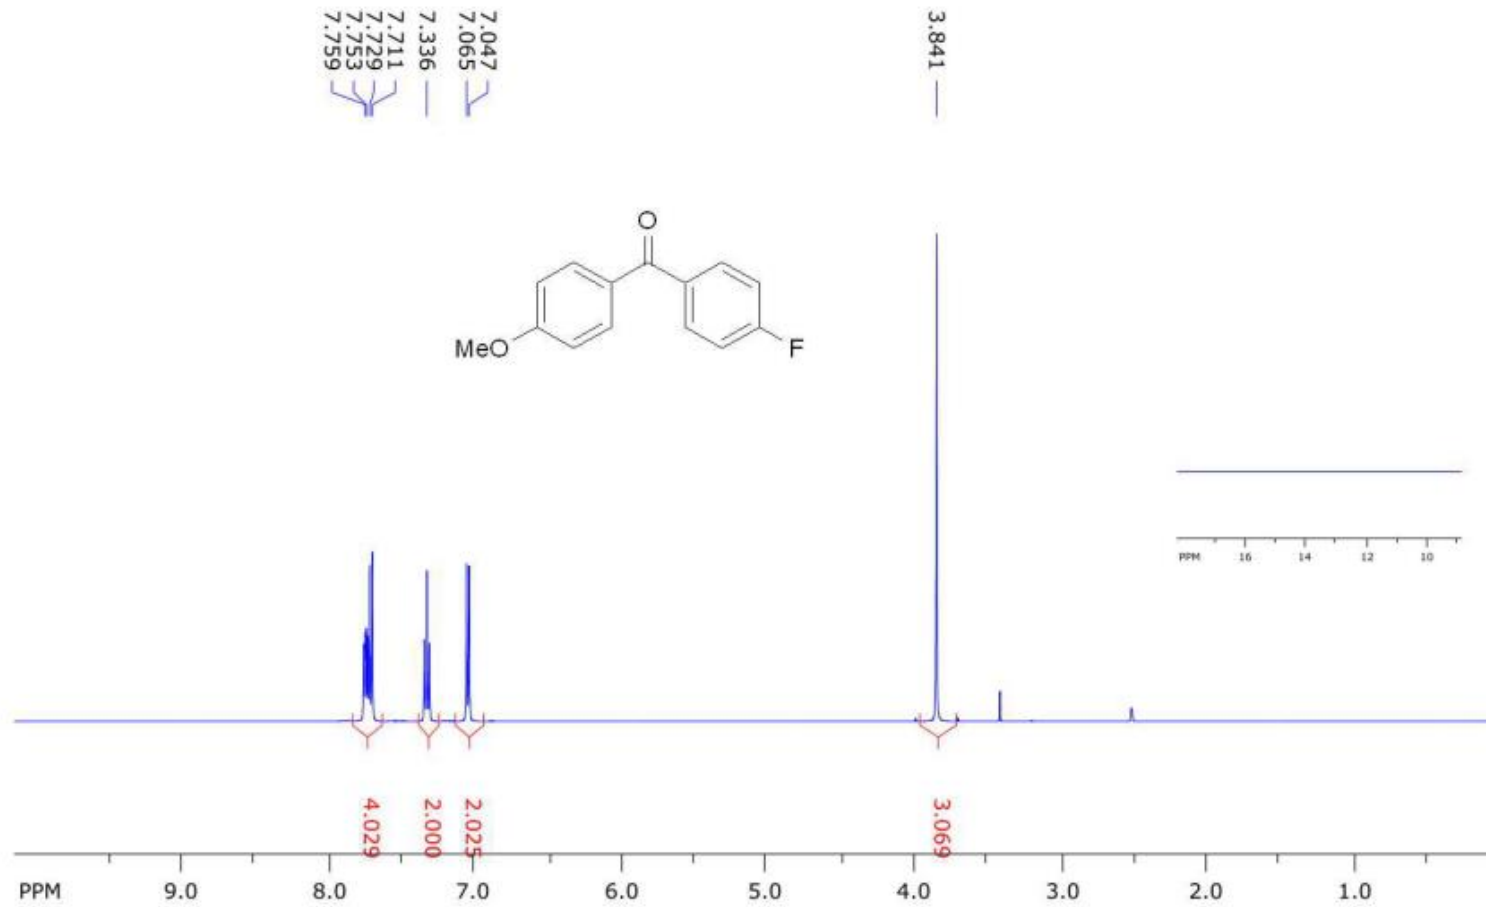

file: ...APO\NMR\500-2\mkr13107\23 1596\fid expt: <zg30>  
transmitter freq.: 500.133001 MHz  
time domain size: 65536 points  
width: 12335.53 Hz = 24.6645 ppm = 0.188225 Hz/pt  
number of scans: 24

freq. of 0 ppm: 500.130003 MHz  
processed size: 65536 complex points  
LB: 0.300 GF: 0.0000  
Hz/cm: 203.591 ppm/cm: 0.40707

# Compound 6b

SpinWorks 4: IVA 1596 13C DMSO

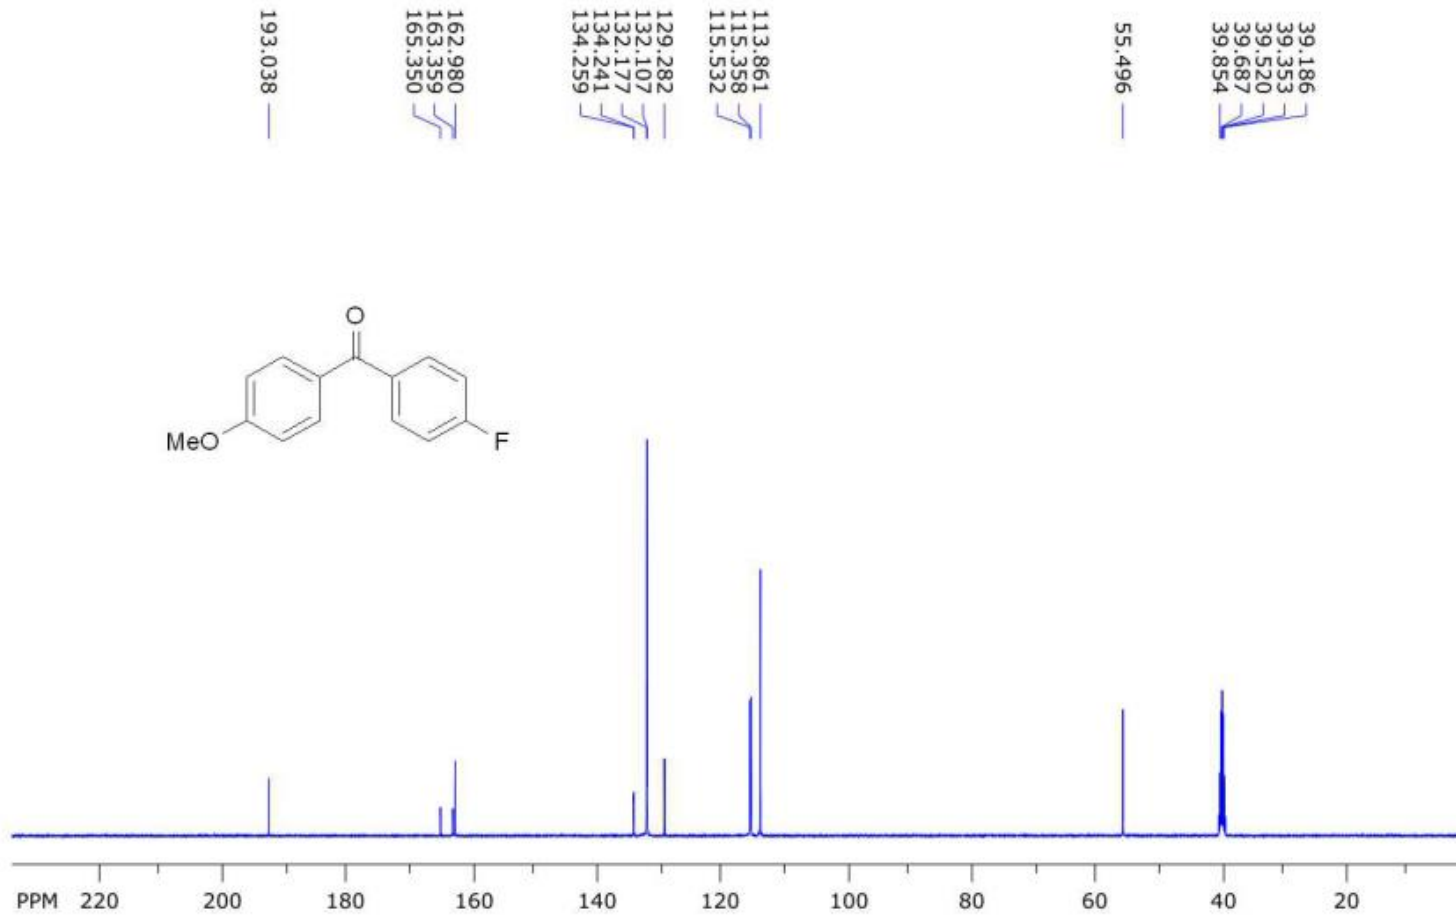

file: D:\NAPO\NMR\500-2\mkr13107\24\fid expt: <zggp30>  
transmitter freq.: 125.772879 MHz  
time domain size: 65536 points  
width: 36057.69 Hz = 286.6889 ppm = 0.550197 Hz/pt  
number of scans: 512

freq. of 0 ppm: 125.757842 MHz  
processed size: 32768 complex points  
LB: 2.000 GF: 0.0000  
Hz/cm: 1180.650 ppm/cm: 9.38716

# Compound 6c

SpinWorks 4: SVS 219 1H CDCl3

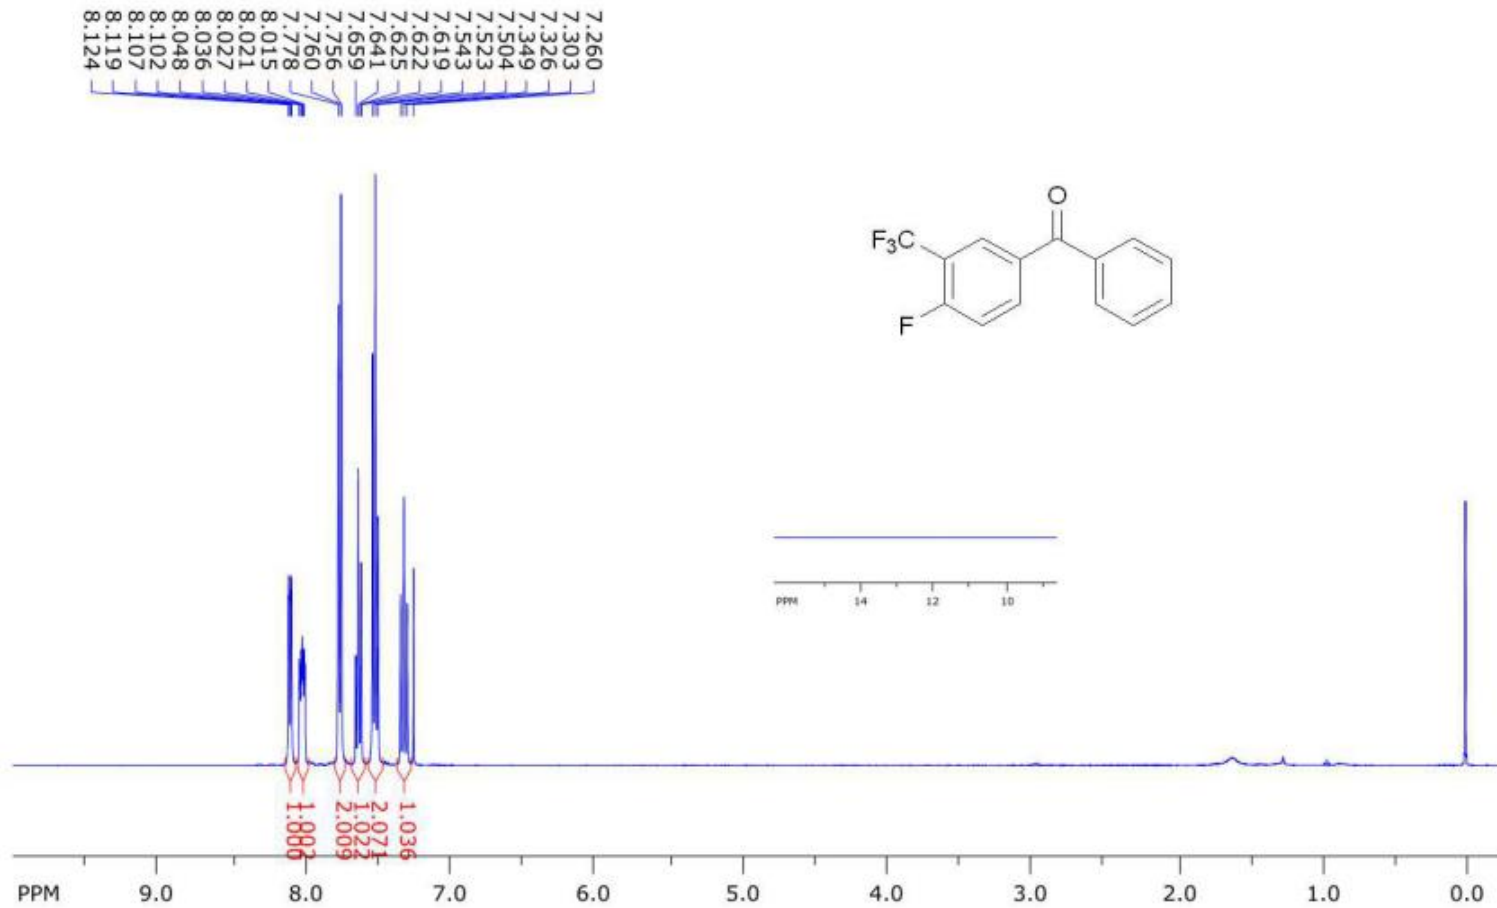

file: D:\NAPO\NMR\JELA\nmr\jn-219\1\fid expt: <zg30>  
transmitter freq.: 400.132471 MHz  
time domain size: 65536 points  
width: 8196.72 Hz = 20.4850 ppm = 0.125072 Hz/pt  
number of scans: 16

freq. of 0 ppm: 400.130009 MHz  
processed size: 65536 complex points  
LB: 0.300 GF: 0.0000  
Hz/cm: 164.660 ppm/cm: 0.41151

# Compound 6c

SpinWorks 4: SVS 219 13C CDCL3

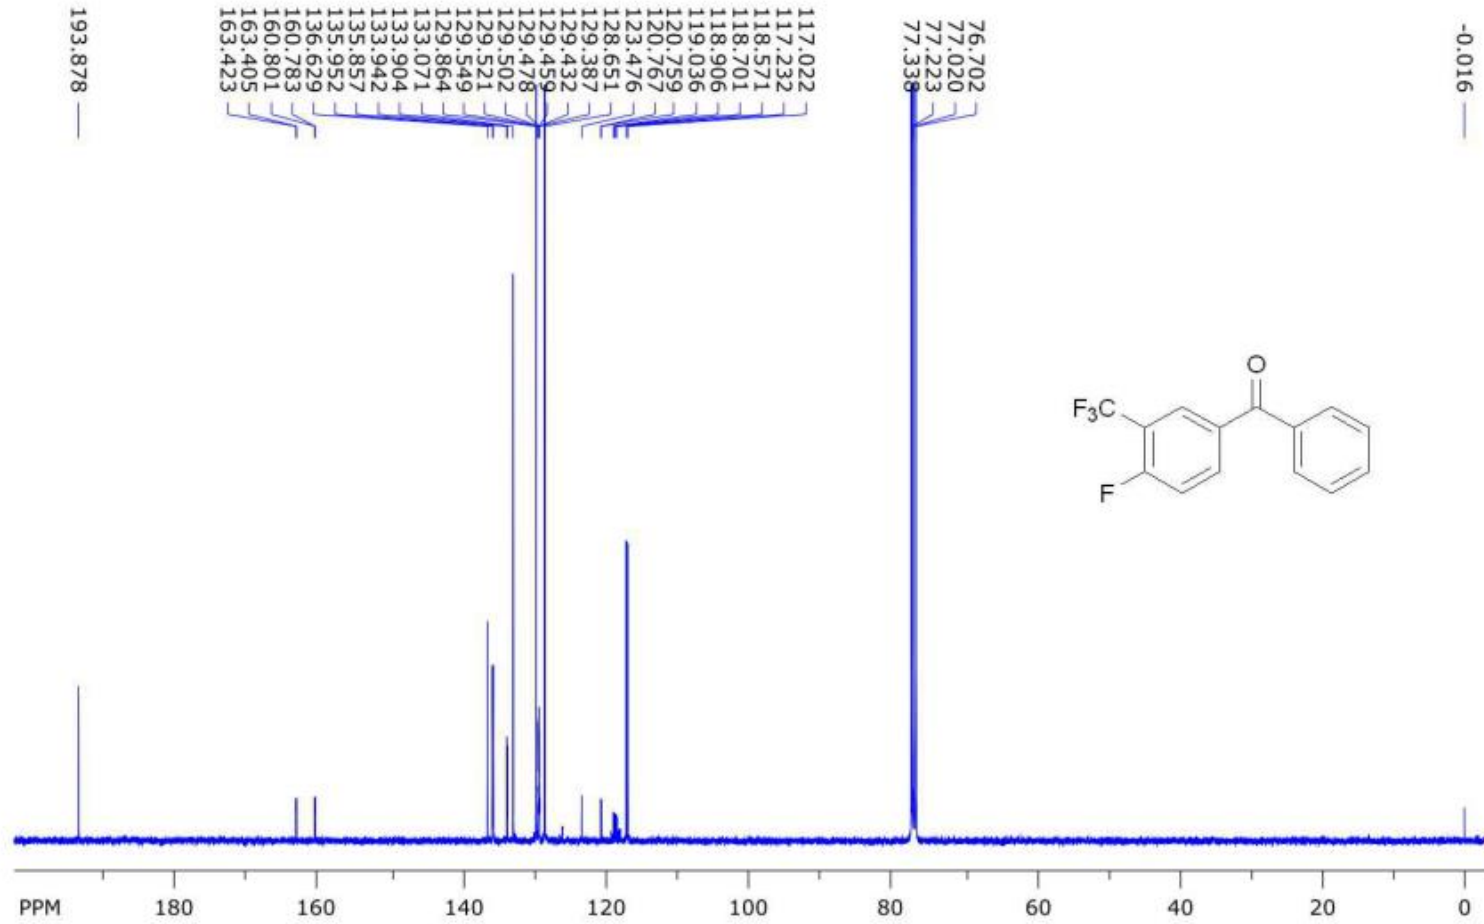

file: D:\NAPO\NMR\JELA\nmr\jn-219\2\fid exp: <zpgg30>  
transmitter freq.: 100.622830 MHz  
time domain size: 65536 points  
width: 23809.52 Hz = 236.6215 ppm = 0.363305 Hz/pt  
number of scans: 3500

freq. of 0 ppm: 100.612767 MHz  
processed size: 32768 complex points  
LB: 1.000 GF: 0.0000  
Hz/cm: 830.173 ppm/cm: 8.25034

# Compound 6d

SpinWorks 4:

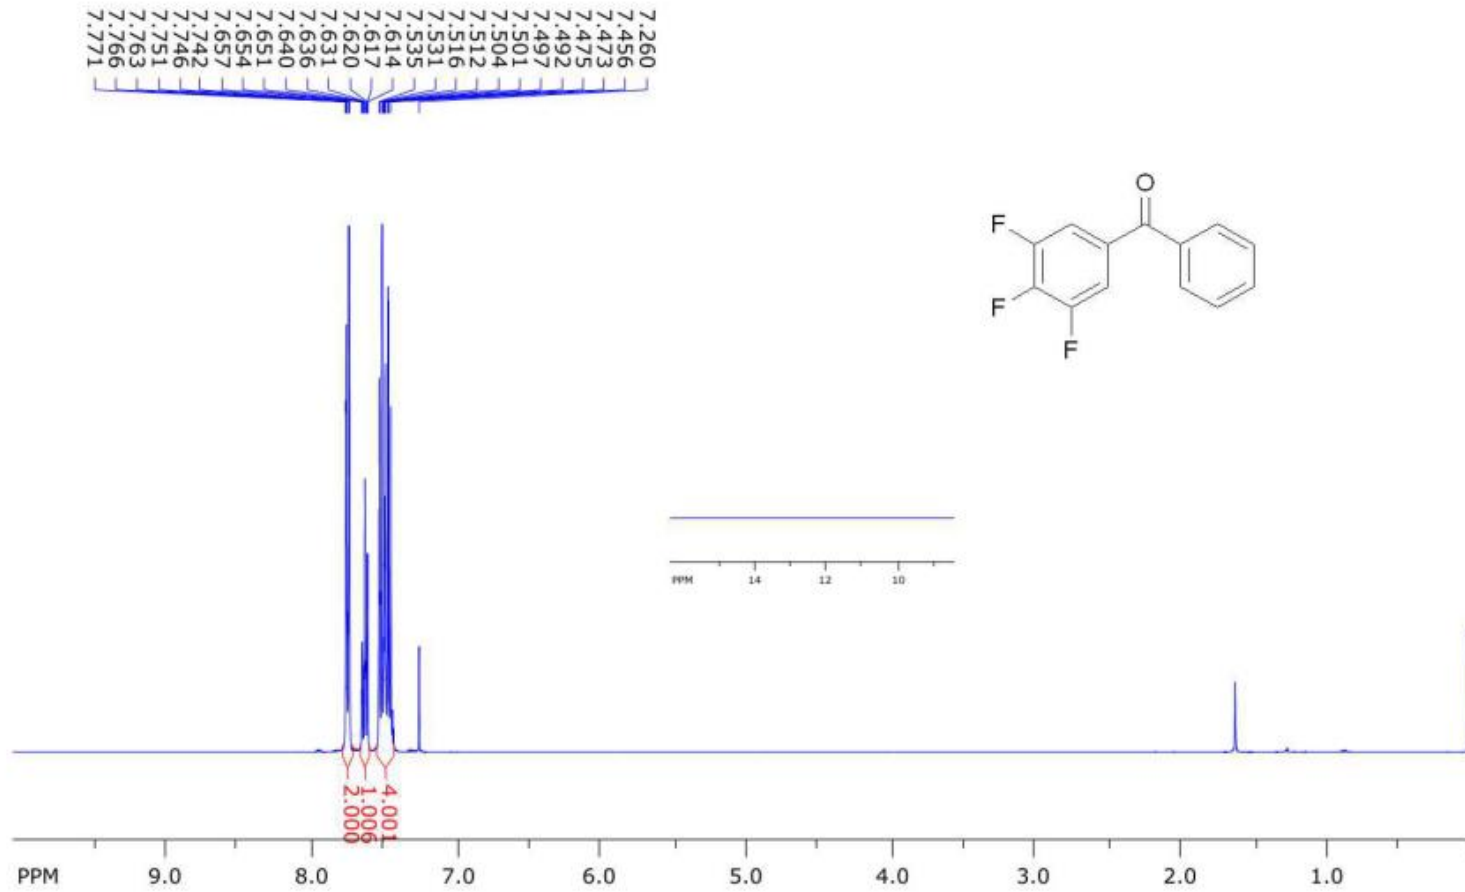

file: ...:\NAPO\NMR\JELA\nmr\jn-S-216\1\fid expt: <zg30>  
transmitter freq.: 400.132471 MHz  
time domain size: 65536 points  
width: 8196.72 Hz = 20.4850 ppm = 0.125072 Hz/pt  
number of scans: 16

freq. of 0 ppm: 400.130009 MHz  
processed size: 65536 complex points  
LB: 0.300 GF: 0.0000  
Hz/cm: 161.758 ppm/cm: 0.40426

# Compound 6d

SpinWorks 4: SVS 216 13C CDCl3

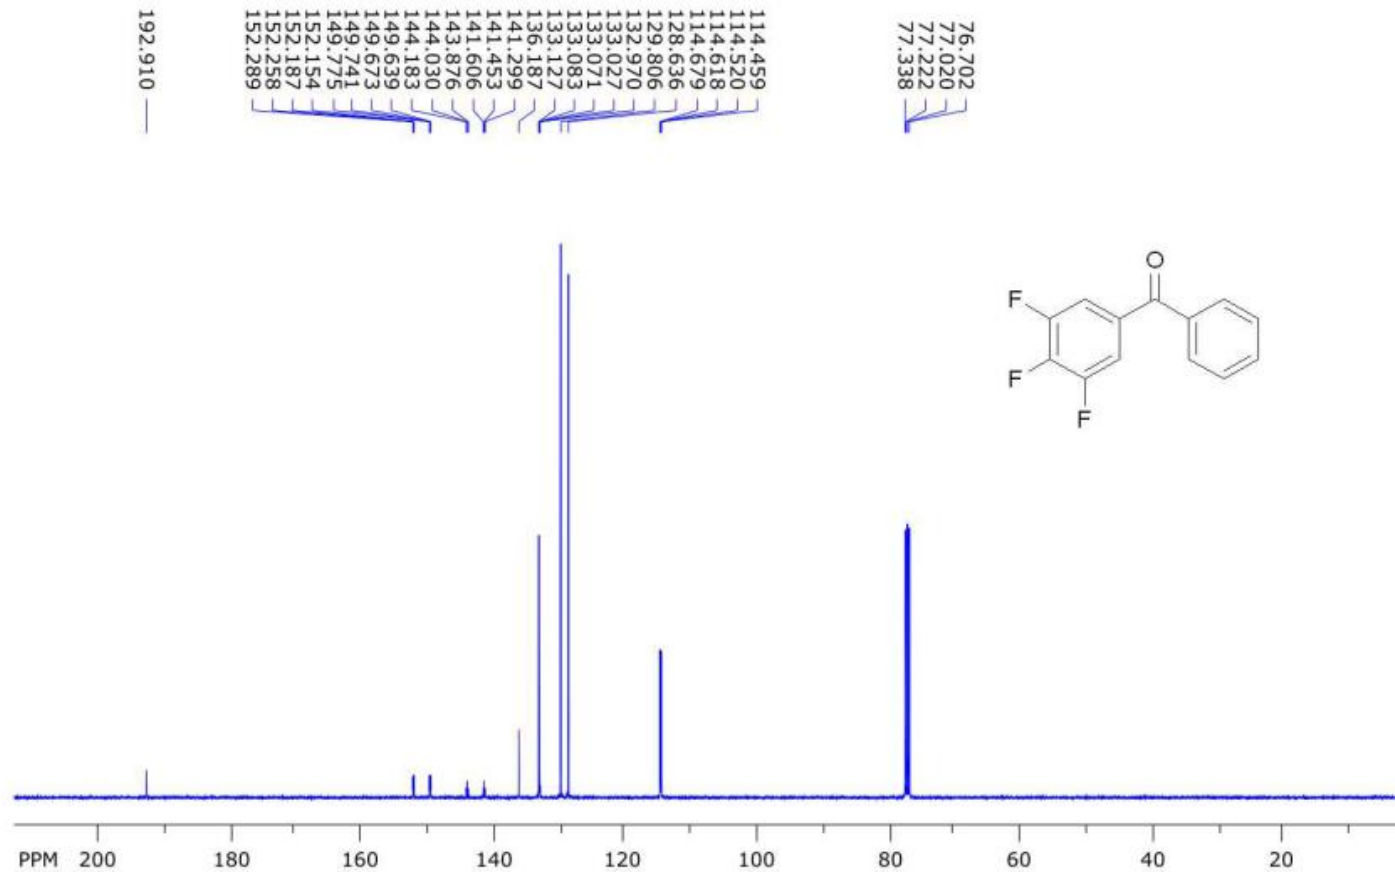

file: ...:\NAPO\NMR\JELA\nmr\jn-S-216\2\fid expt: <zgpg30>  
transmitter freq.: 100.622830 MHz  
time domain size: 65536 points  
width: 23809.52 Hz = 236.6215 ppm = 0.363305 Hz/pt  
number of scans: 2000

freq. of 0 ppm: 100.612769 MHz  
processed size: 32768 complex points  
LB: 1.000 GF: 0.0000  
Hz/cm: 852.297 ppm/cm: 8.47021



# Compound 6e

SpinWorks 4: IVS 1614 1H CDCl3

7.097  
7.106  
7.115  
7.123  
7.133  
7.141  
7.182  
7.190  
7.197  
7.204  
7.208  
7.215  
7.222  
7.228  
7.232  
7.238  
7.244  
7.247  
7.254  
7.455  
7.471  
7.487  
7.585  
7.588  
7.590  
7.602  
7.615  
7.617  
7.821  
7.835  
7.837

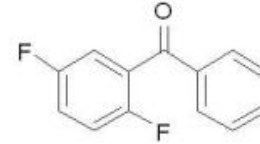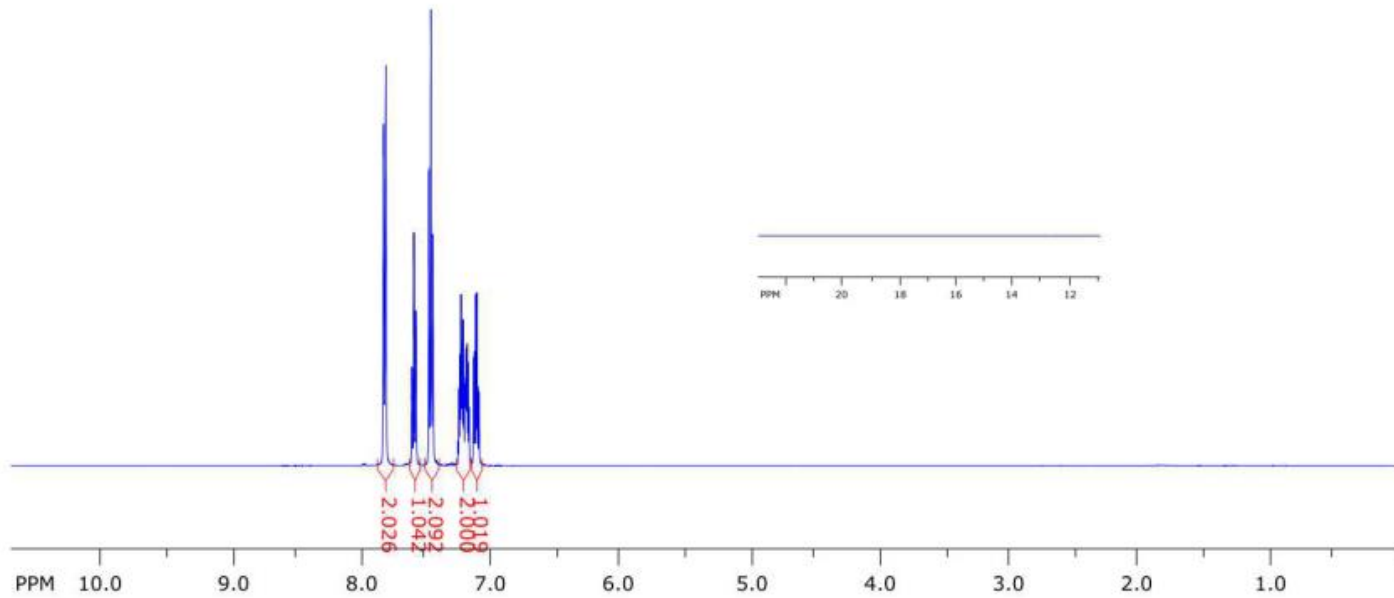

file: D:\NAPO\NMR\500-2\mkr10402\25\fid expt: <zg30>  
transmitter freq.: 500.133001 MHz  
time domain size: 65536 points  
width: 12335.53 Hz = 24.6645 ppm = 0.188225 Hz/pt  
number of scans: 24

freq. of 0 ppm: 500.127637 MHz  
processed size: 65536 complex points  
LB: 0.300 GF: 0.0000  
Hz/cm: 215.053 ppm/cm: 0.42999

# Compound 6e

SpinWorks 4: IVA 1614 13C CDCL3

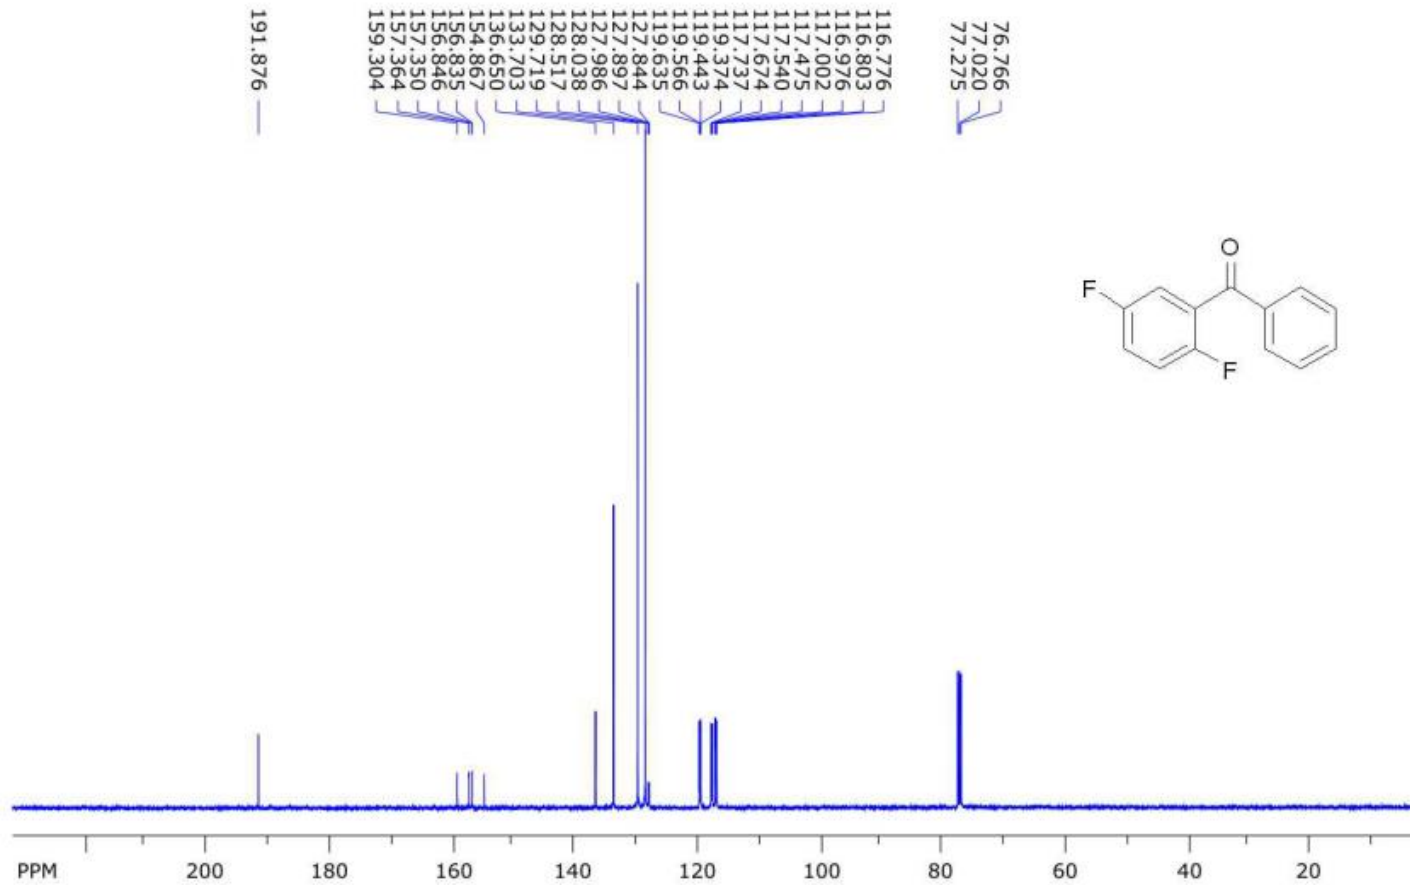

file: D:\NAPO\NMR\500-2\mkr10402\26\fid expt: <zpgg30>  
transmitter freq.: 125.772879 MHz  
time domain size: 65536 points  
width: 36057.69 Hz = 286.6889 ppm = 0.550197 Hz/pt  
number of scans: 512

freq. of 0 ppm: 125.757202 MHz  
processed size: 32768 complex points  
LB: 2.000 GF: 0.0000  
Hz/cm: 1161.504 ppm/cm: 9.23494

# Compound 6f

SpinWorks 4: IVA 1598 1H DMSO

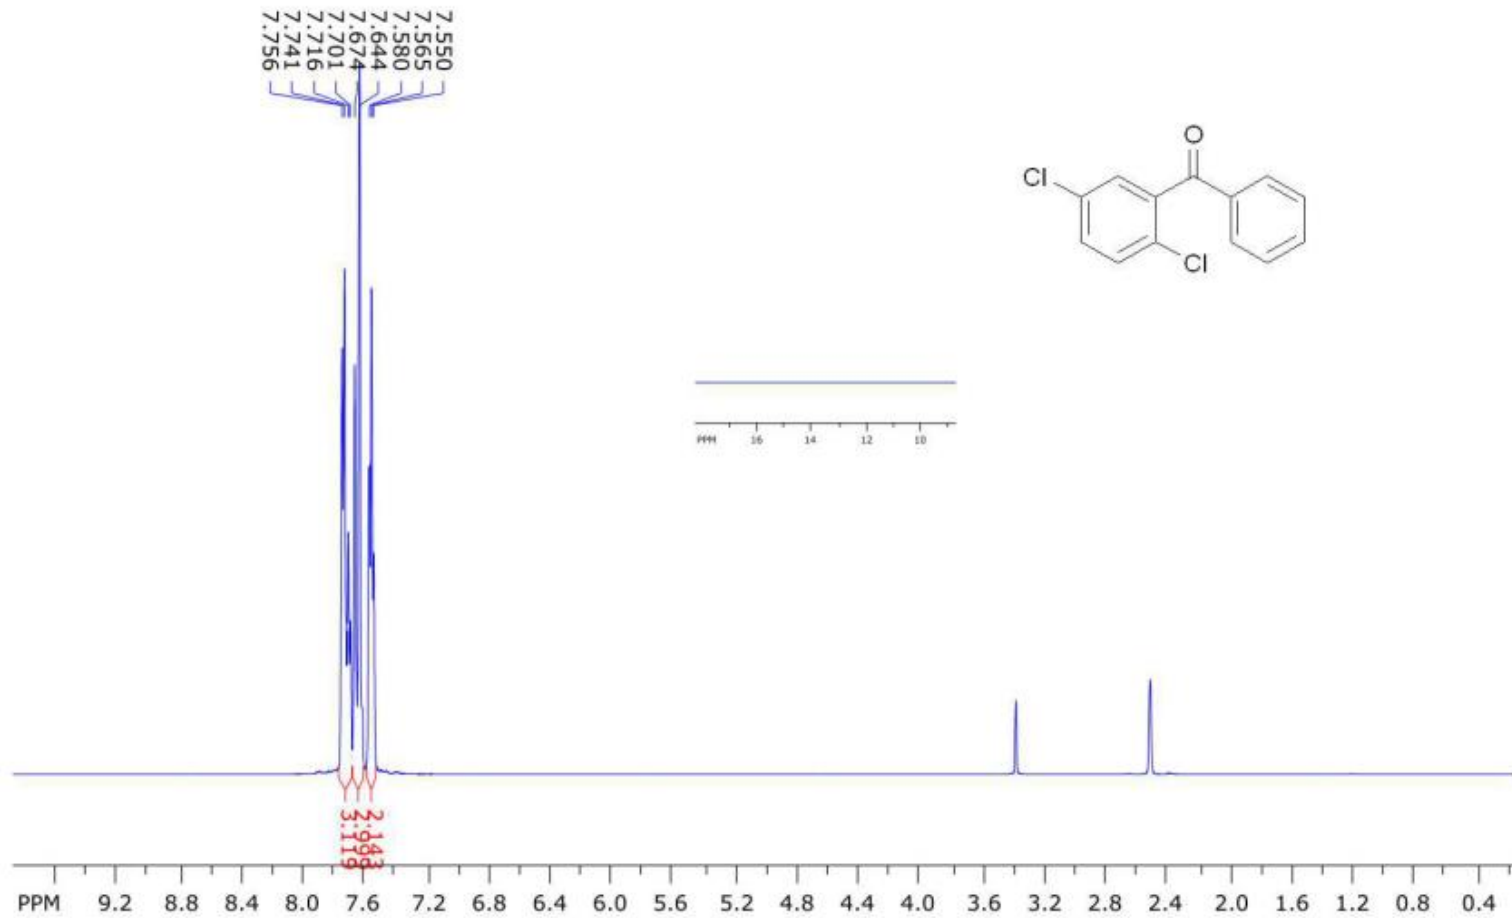

file: D:\NAPO\NMR\500-2\mkr11305\21\fid expt: <zg30>  
transmitter freq.: 500.133001 MHz  
time domain size: 65536 points  
width: 12335.53 Hz = 24.6645 ppm = 0.188225 Hz/pt  
number of scans: 24

freq. of 0 ppm: 500.130002 MHz  
processed size: 65536 complex points  
LB: 0.300 GF: 0.0000  
Hz/cm: 195.403 ppm/cm: 0.39070

# Compound 6f

SpinWorks 4: IVA 1598 13C DMSO

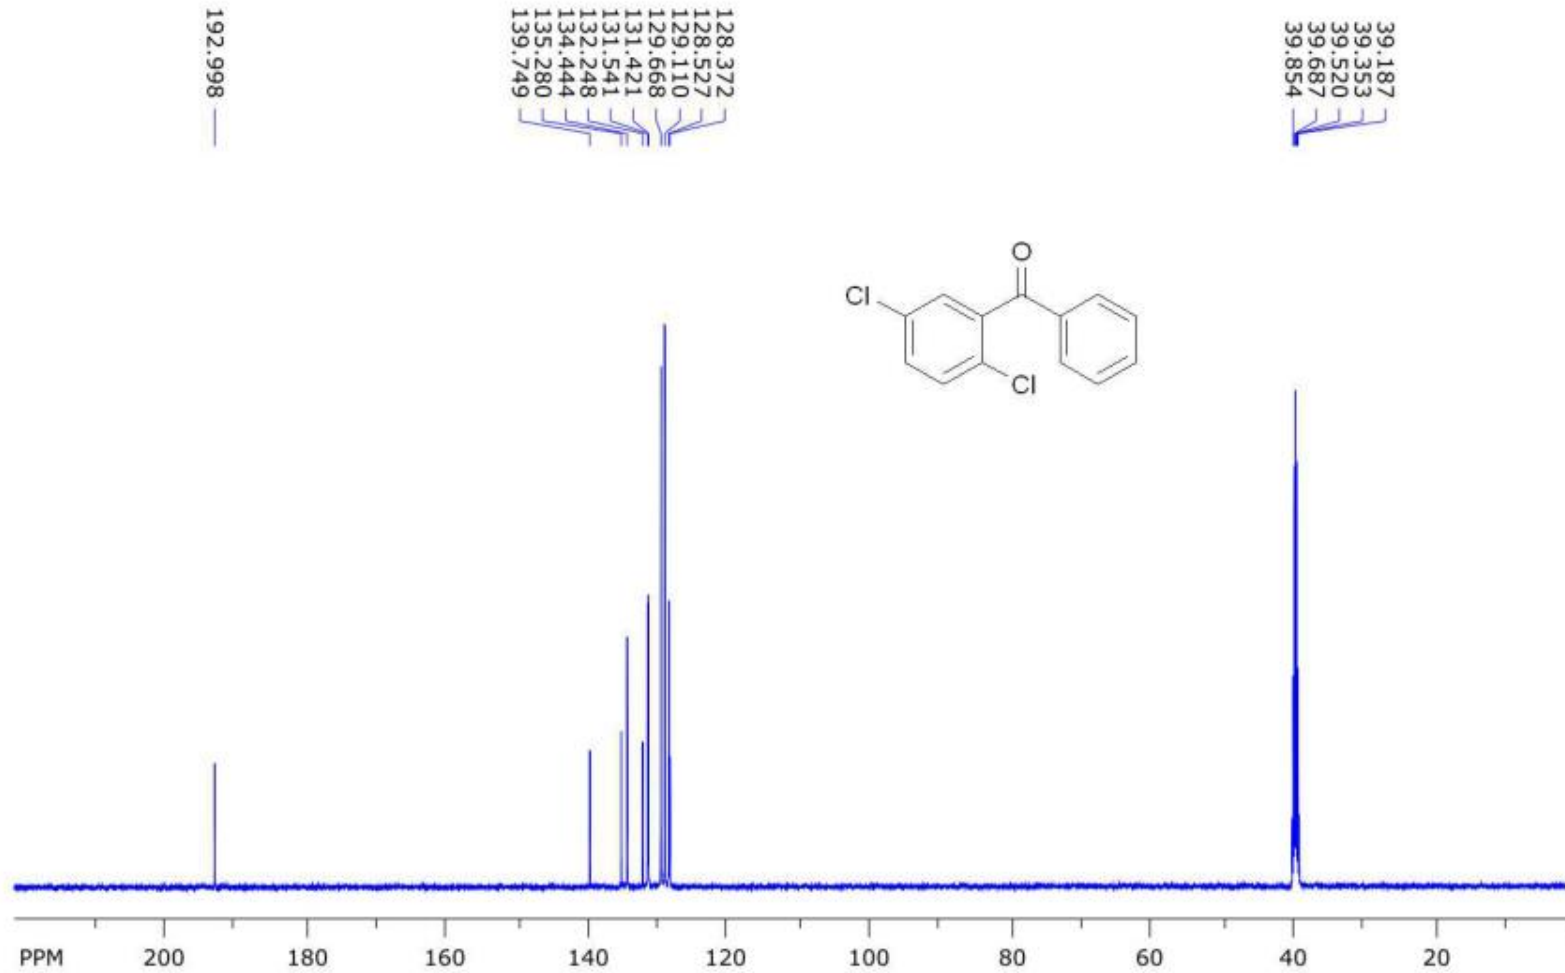

file: D:\NAPO\NMR\500-2\mkr11305\22\fid expt: <zggp30>  
transmitter freq.: 125.772879 MHz  
time domain size: 65536 points  
width: 36057.69 Hz = 286.6889 ppm = 0.550197 Hz/pt  
number of scans: 512

freq. of 0 ppm: 125.757847 MHz  
processed size: 32768 complex points  
LB: 2.000 GF: 0.0000  
Hz/cm: 1109.782 ppm/cm: 8.82370

# Compound 6g

SpinWorks 4: IVAB 3671 1H CDCl3

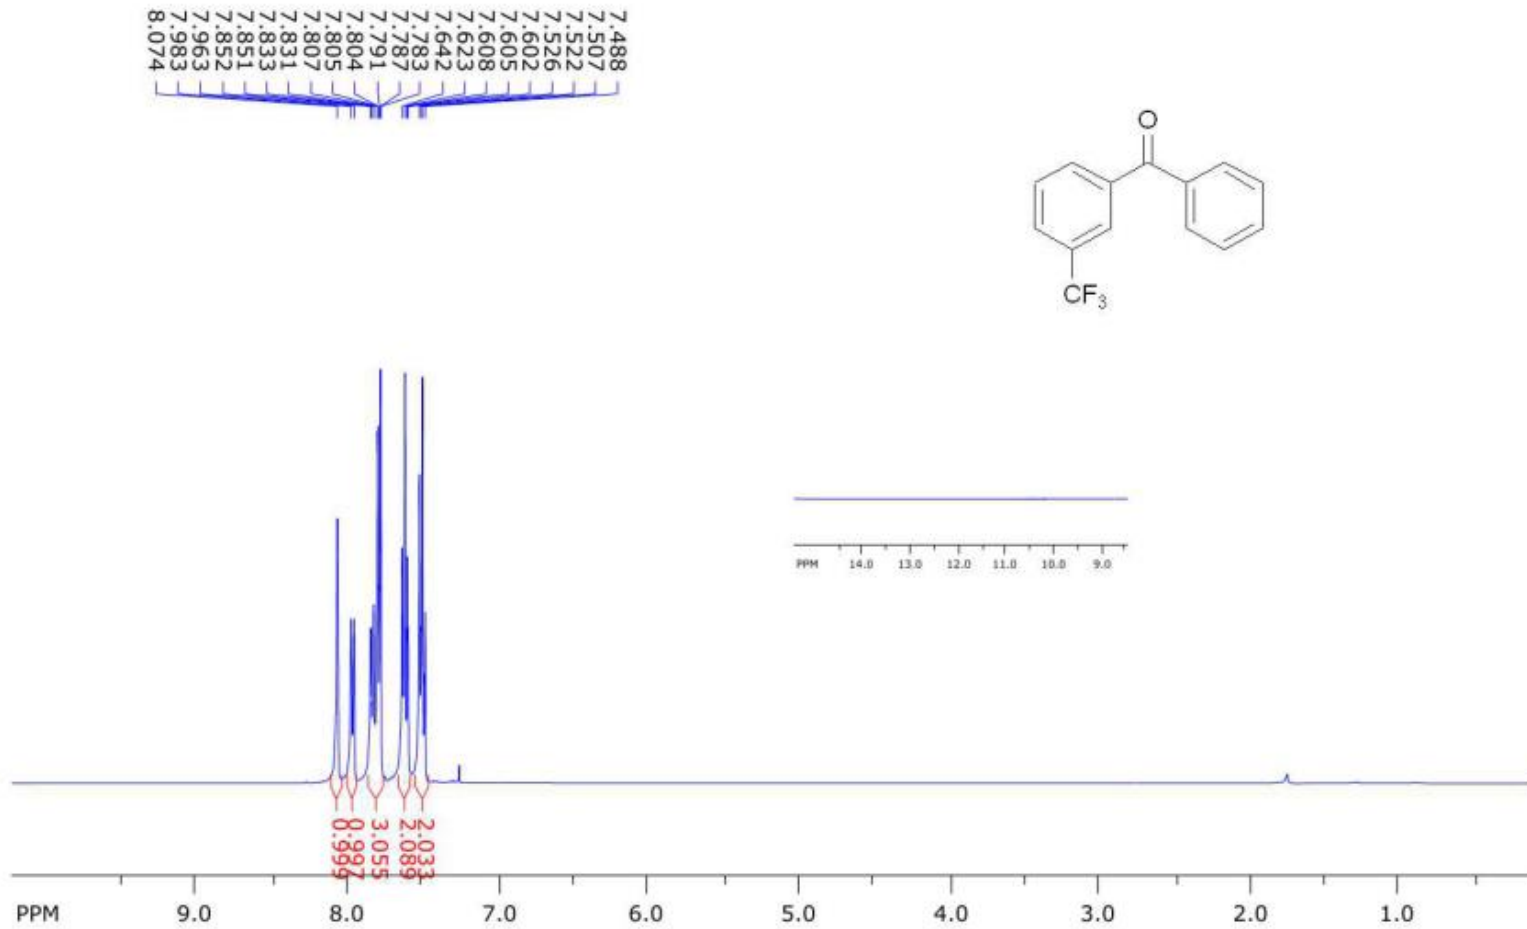

file: ...hael Slovakia\NMR\Ivab-3671\25\fid expt: <zg30>  
transmitter freq.: 400.133001 MHz  
time domain size: 65536 points  
width: 6393.86 Hz = 15.9793 ppm = 0.097563 Hz/pt  
number of scans: 64

freq. of 0 ppm: 400.130009 MHz  
processed size: 65536 complex points  
LB: 0.300 GF: 0.0000  
Hz/cm: 162.393 ppm/cm: 0.40585

# Compound 6g

SpinWorks 4: IVAB 3671 13C CDCI3

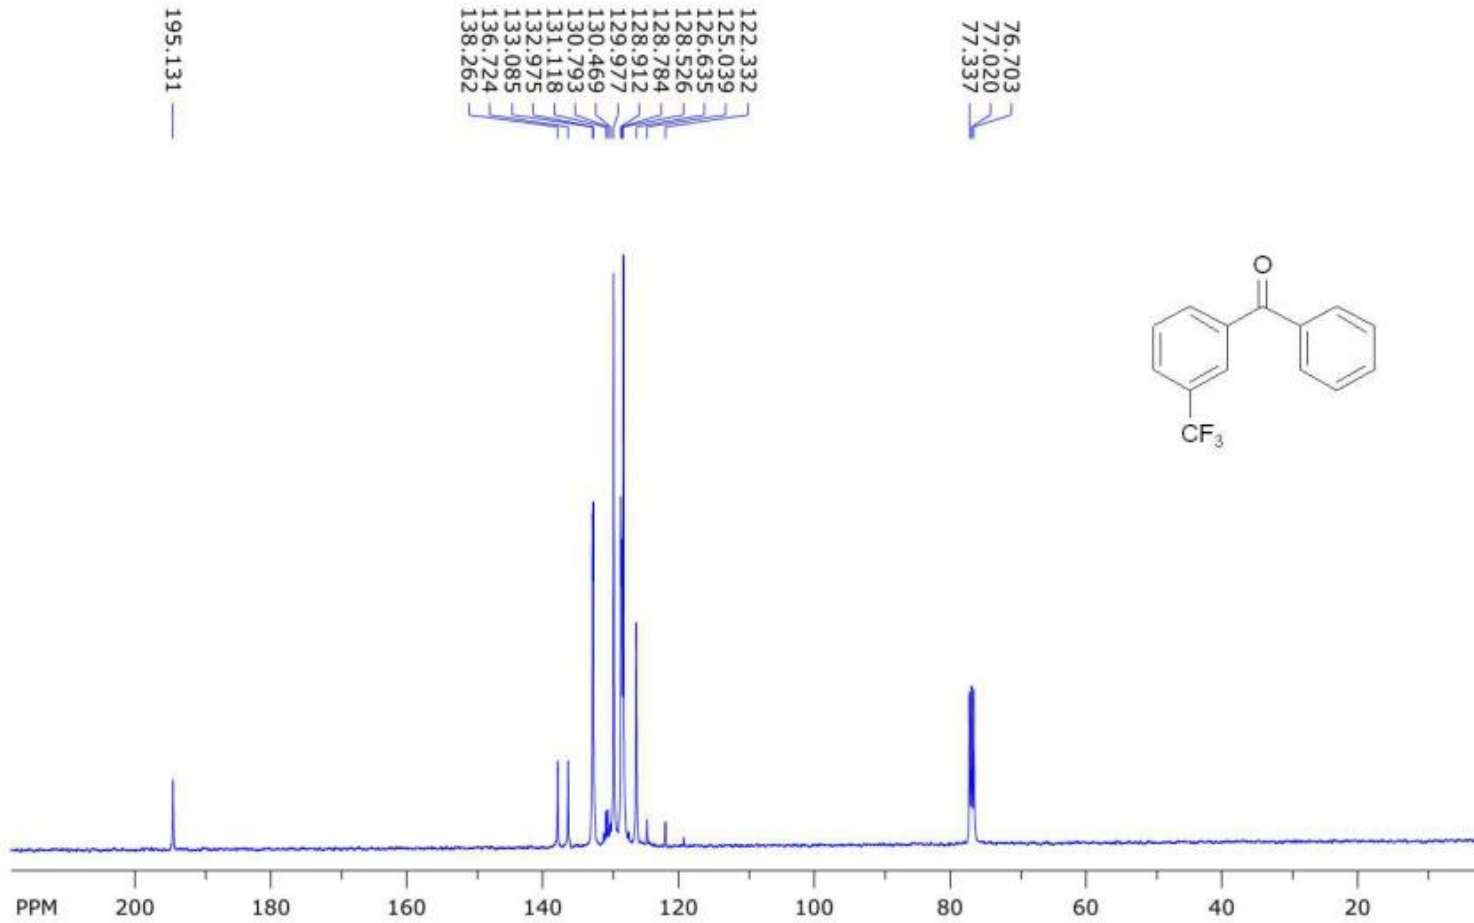

file: ...hael Slovakia\NMR\Ivab-3671\26\fid expt: <zggp30>  
transmitter freq.: 100.623836 MHz  
time domain size: 65536 points  
width: 24038.46 Hz = 238.8943 ppm = 0.366798 Hz/pt  
number of scans: 1001

freq. of 0 ppm: 100.612772 MHz  
processed size: 32768 complex points  
LB: 10.000 GF: 0.0000  
Hz/cm: 875.383 ppm/cm: 8.69956

# Compound 6h

SpinWorks 4: SVS 217 1H CDCL3

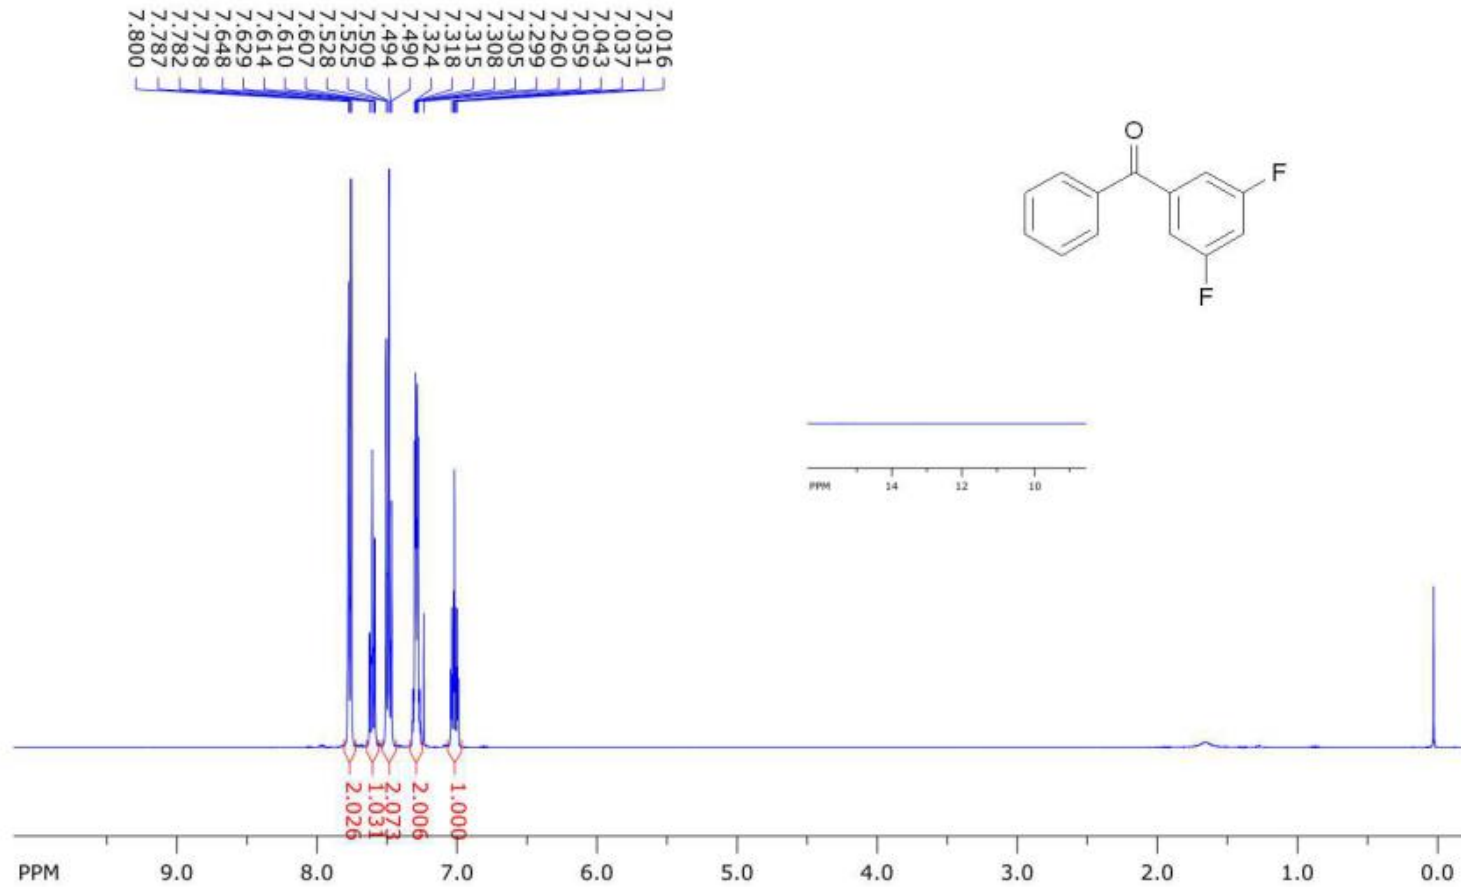

file: D:\NAPO\NMR\JELA\nmr\jn-217\1\fid exp: <zg30>  
transmitter freq.: 400.132471 MHz  
time domain size: 65536 points  
width: 8196.72 Hz = 20.4850 ppm = 0.125072 Hz/pt  
number of scans: 16

freq. of 0 ppm: 400.130009 MHz  
processed size: 65536 complex points  
LB: 0.300 GF: 0.0000  
Hz/cm: 167.199 ppm/cm: 0.41786

# Compound 6h

SpinWorks 4: SVS 217 13C CDCL3

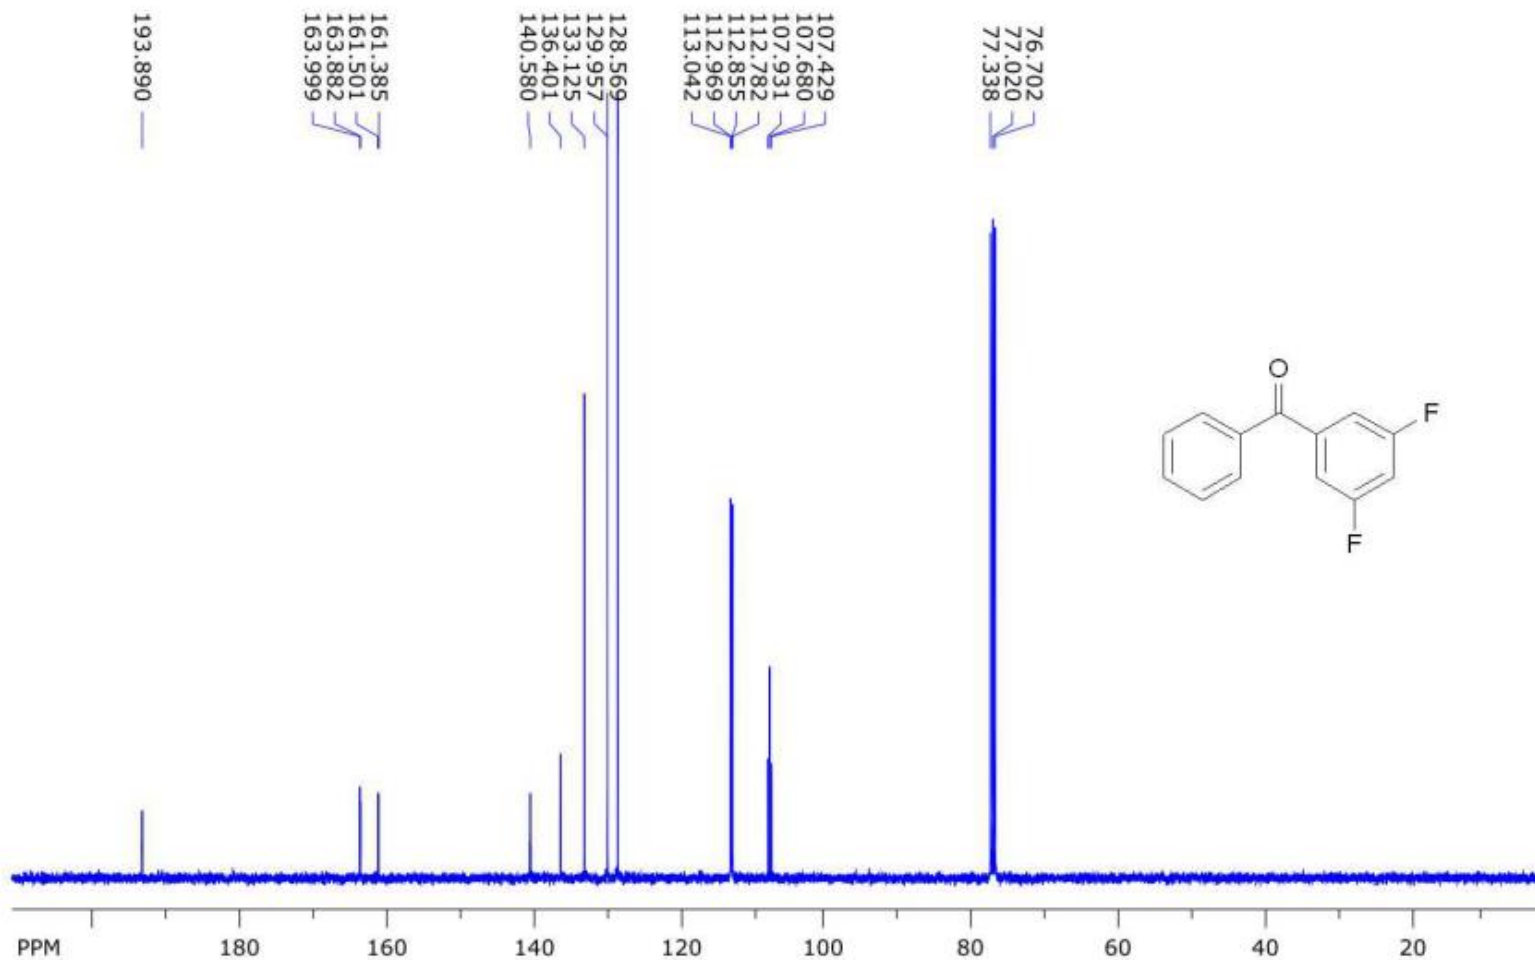

file: D:\NAPO\NMR\JELA\nmr\jn-217\3\fid expt: <zgpg30>  
transmitter freq.: 100.622830 MHz  
time domain size: 65536 points  
width: 23809.52 Hz = 236.6215 ppm = 0.363305 Hz/pt  
number of scans: 237

freq. of 0 ppm: 100.612768 MHz  
processed size: 32768 complex points  
LB: 1.000 GF: 0.0000  
Hz/cm: 845.976 ppm/cm: 8.40739



# Compound 6i

SpinWorks 4: SVS 231 1H CDCL3

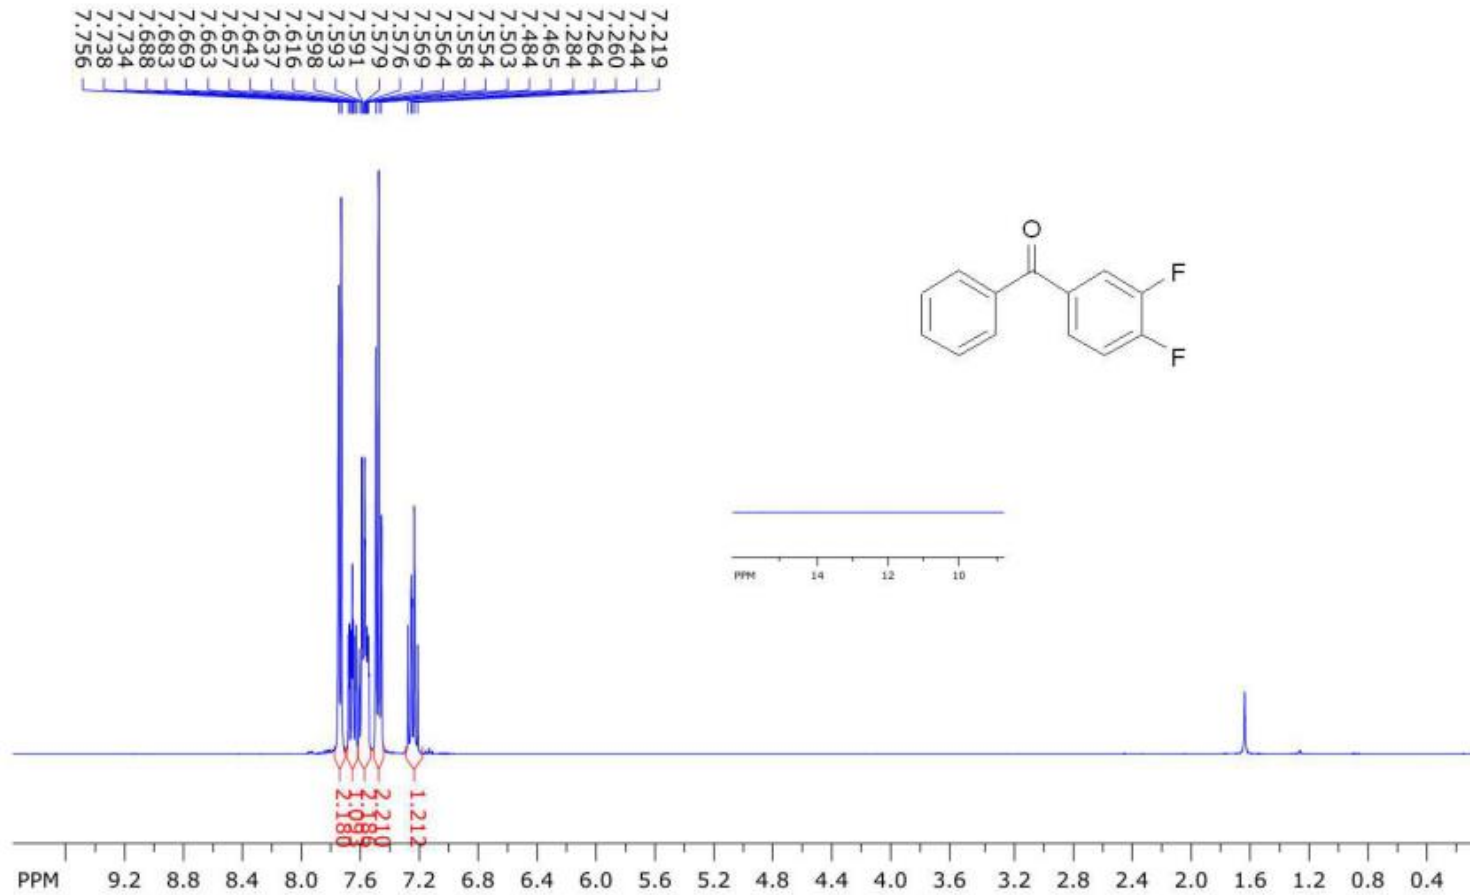

file: D:\NAPO\NMR\JELA\nmr\jn-231\1\fid expt: <zg30>  
transmitter freq.: 400.132471 MHz  
time domain size: 65536 points  
width: 8196.72 Hz = 20.4850 ppm = 0.125072 Hz/pt  
number of scans: 16

freq. of 0 ppm: 400.130016 MHz  
processed size: 65536 complex points  
LB: 0.300 GF: 0.0000  
Hz/cm: 159.219 ppm/cm: 0.39792

# Compound 6i

SpinWorks 4: SVS 231 13C CDCL3

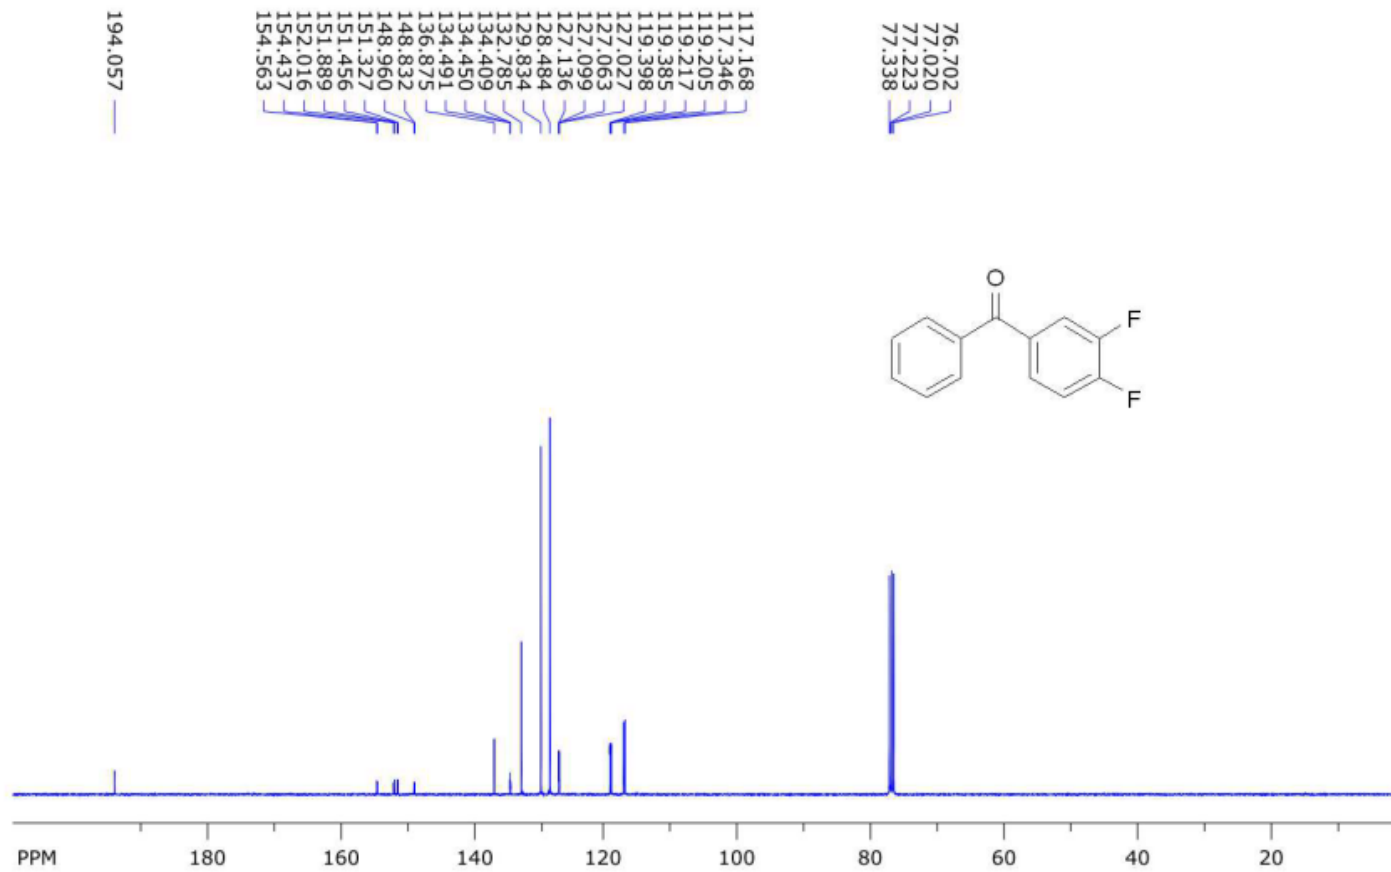

file: D:\NAPO\NMR\JELA\nmr\jn-231\2\fid expt: <zpgg30>  
transmitter freq.: 100.622830 MHz  
time domain size: 65536 points  
width: 23809.52 Hz = 236.6215 ppm = 0.363305 Hz/pt  
number of scans: 5000

freq. of 0 ppm: 100.612769 MHz  
processed size: 32768 complex points  
LB: 1.000 GF: 0.0000  
Hz/cm: 840.708 ppm/cm: 8.35504

## (D) DFT Study.

### 1. Computational methodology

DFT calculations are performed to gain insight into the mechanism of Ru-catalyzed activation of free phenols in a one-step Suzuki Miyaura cross-coupling under mechanochemical conditions. Herein, all the density functional theory (DFT) calculations are carried out using Gaussian 09 suite of programs.<sup>1</sup> The geometry optimizations are simulated at B3LYP functional of DFT without any constraints. B3LYP is computationally low cost functional, which is frequently employed for the quantum chemical calculations of reaction mechanisms, and geometric and electronic properties.<sup>2-4</sup> Additionally, in the domain of catalysis, B3LYP functional is an accurate and a reliable functional.<sup>5,6</sup> All studied structures are relaxed with Pople-type basis set 6-31G(d,p) for lighter atoms (C, O, N, H and B) and Los Alamos pseudopotential basis set LanL2DZ for heavy atoms (Ru and Zr).<sup>7</sup> Moreover, the structures of intermediates (minima) and transition states (saddle points) over potential energy surface are confirmed *via* frequency analysis i.e., the presence of one imaginary frequency in the Hessian matrix validates a saddle point (transition state), whereas absence of imaginary (negative) frequencies confirms the minima nature of found intermediate species. Additionally, transition state is also identified through animation of negative frequency, where the motion of the eigen vector corresponds to reaction axis.<sup>8</sup> All the reported energy values are in kcal/mol, while the discussed bond distances are reported in angstrom (Å), for all the studied geometries.

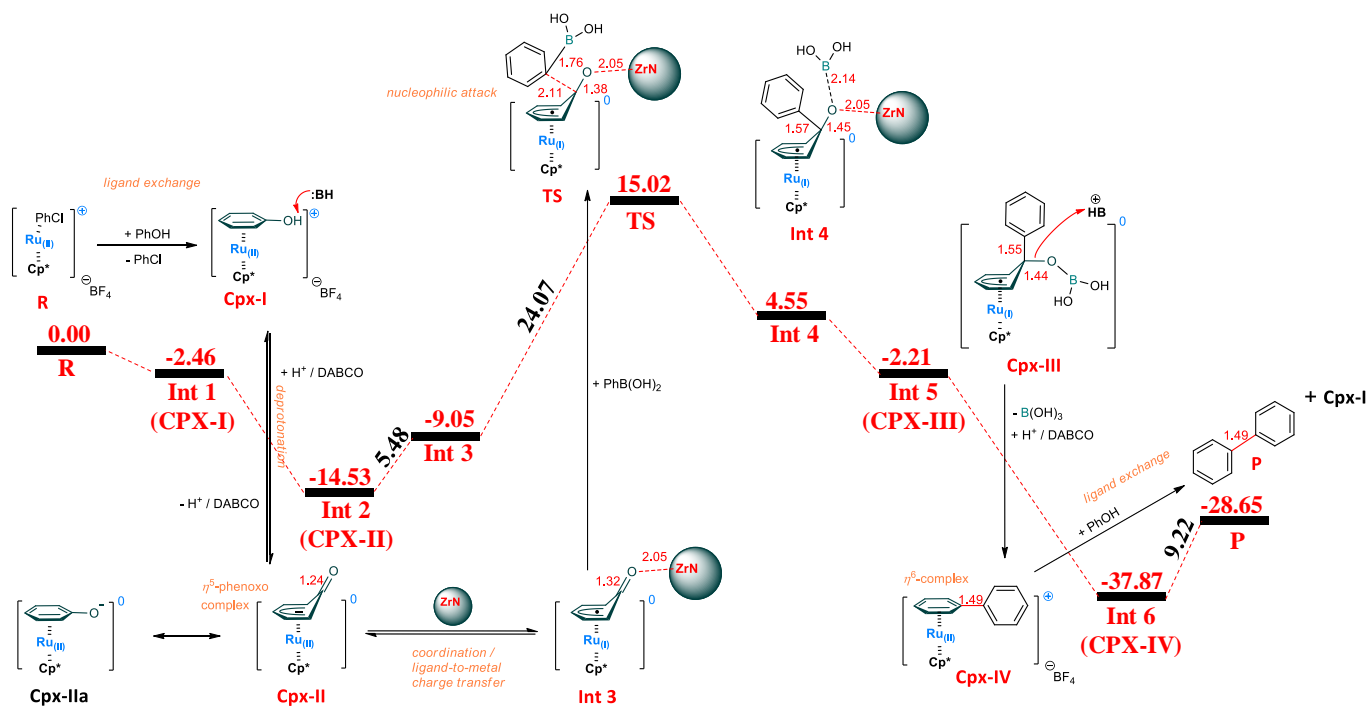

Figure S1. Energy profile for Ru-catalyzed formal activation of C—OH bond (free phenols) to biphenyl (Ar-Ar). All the reported energy values are presented in kcal/mol with reference initial reactant (R) at 0.00 kcal/mol at B3LYP functional with Pople style basis set 6-31G(d,p) for lighter atoms (C, O, N, H & B) and Los Almos pseudopotential basis set LanL2DZ for heavy atoms (Ru & Zr). Measured bond lengths are presented in Angstroms (Å).

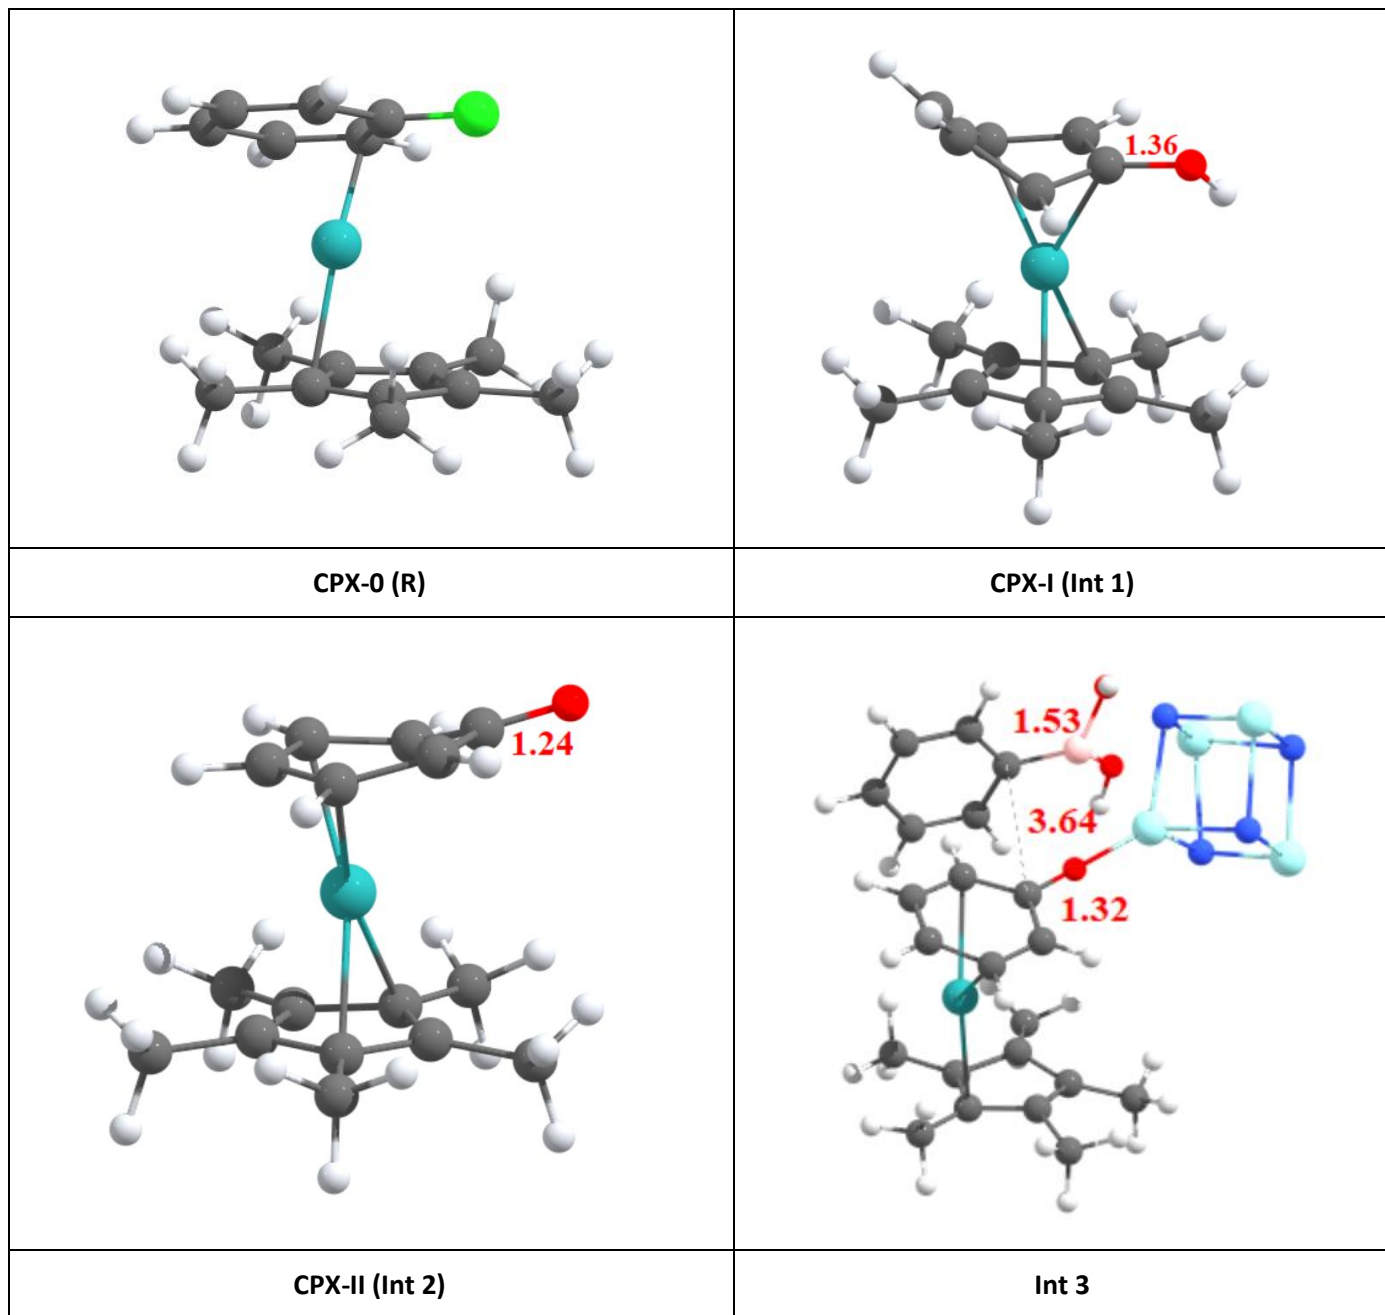

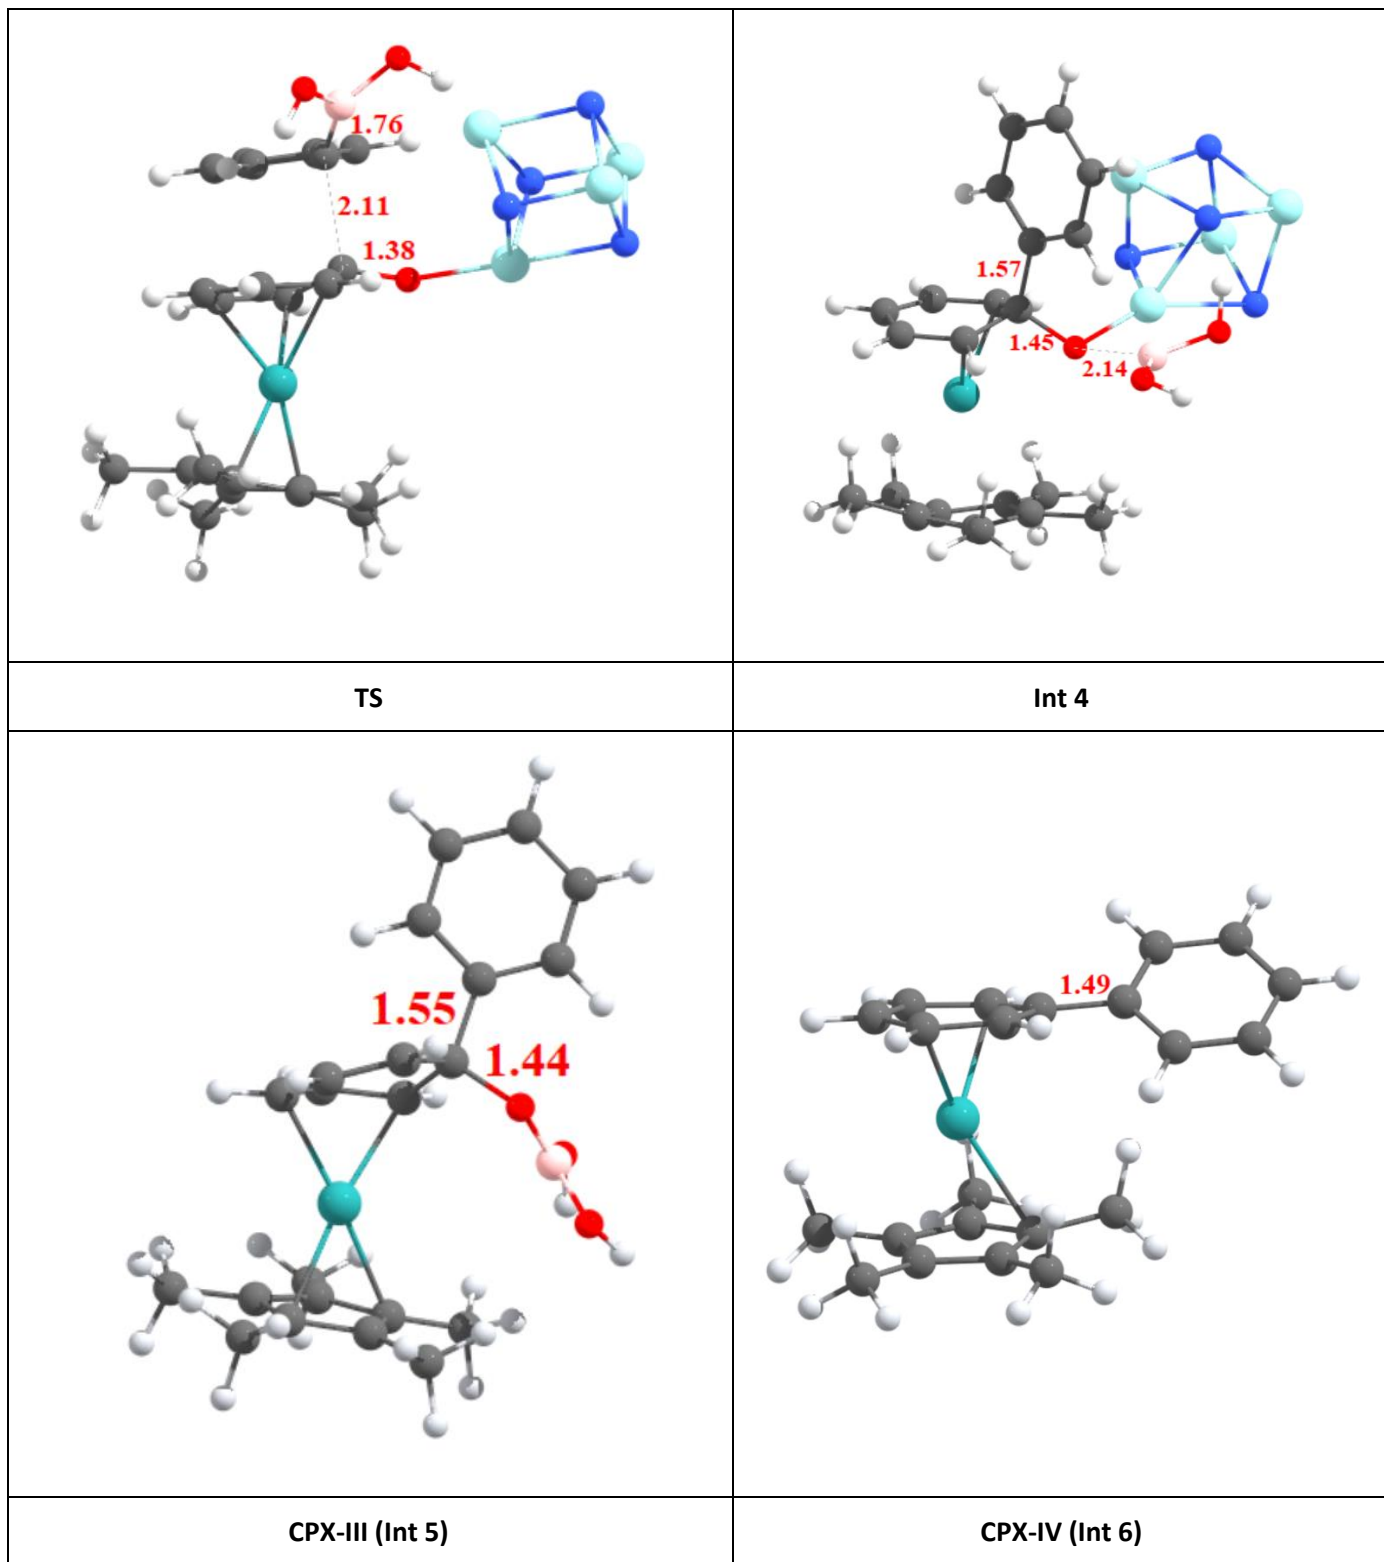

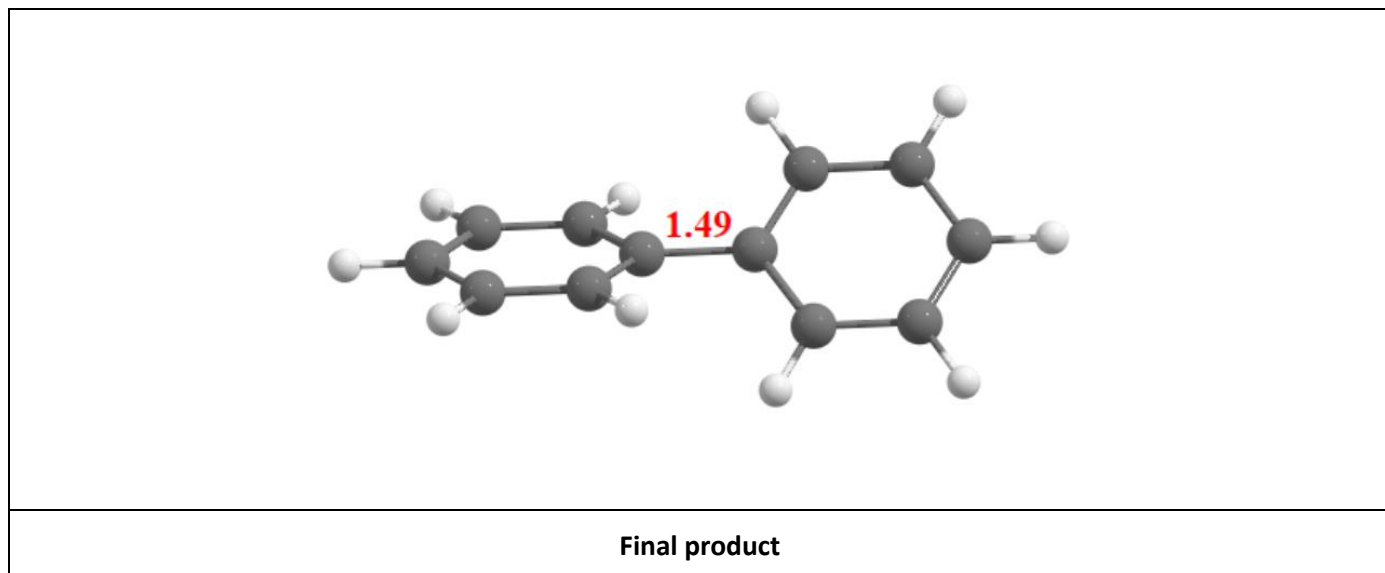

**Figure S2: Optimized geometries of reactants, intermediates, transitions state and final product along with important bond lengths.**

**Table S4: Summary of electronic energy (SCF energy) and Gibbs free energy of optimized reacting species in Scheme 4.**

| Optimized Geometry     | SCF energy (au) | Gibbs free energy (au) |
|------------------------|-----------------|------------------------|
| <b>CPX-0 (R)</b>       | -673.91         | -673.70                |
| <b>CPX-I (Int1)</b>    | -595.49         | -595.32                |
| <b>CPX-II (Int 2)</b>  | -594.87         | -594.72                |
| <b>Int 3</b>           | -1605.42        | -1605.31               |
| <b>TS</b>              | -1605.38        | -1605.26               |
| <b>Int 4</b>           | -1605.40        | -1605.29               |
| <b>CPX-III (Int 5)</b> | -1003.16        | -1002.89               |
| <b>CPX-IV (Int 6)</b>  | -751.33         | -751.09                |
| <b>Final product</b>   | -463.32         | -463.17                |

## References

1. Frisch, M., et al., *01; Gaussian, Inc.* Wallingford, CT, 2009.
2. Bibi, S., et al., *Structure and electronic characterization of pristine and functionalized single wall carbon nanotube interacting with sulfide ion: A density functional theory approach.* Journal of Molecular Liquids, 2022. **366**: p. 120144.
3. Mkrtychyan, S., et al., *Mechanochemical arylyative detrifluoromethylation of trifluoromethylarenes.* Organic & Biomolecular Chemistry, 2023. **21**(32): p. 6549-6555.
4. Mkrtychyan, S., et al., *Metal-Free Supramolecular Reduction of Nitro Compounds into the Cucurbit[7]uril Cavity: Testing the Enabling Technique in Aqueous Media.* ACS Sustainable Chemistry & Engineering, 2023. **11**(23): p. 8406-8412.

5. Sarfaraz, S., et al., *Transition Metal-Doped C20 Fullerene-Based Single-Atom Catalysts with High Catalytic Activity for Hydrogen Dissociation Reaction*. ACS Omega, 2023. **8**(15): p. 14077-14088.
6. Sarfaraz, S., et al., *Adsorption and dissociation of H<sub>2</sub> molecule over first-row transition metal doped C<sub>24</sub> nanocage as remarkable SACs: A comparative study*. International Journal of Hydrogen Energy, 2023.
7. Danish, M., et al., *Synthesis, single-crystal X-ray diffraction, and in vitro biological evaluation of sodium, cobalt, and tin complexes of o-nitro-/o-methoxyphenylacetic acid: experimental and theoretical investigation*. Monatshefte für Chemie-Chemical Monthly, 2020. **151**(11): p. 1727-1736.
8. Mukhtar, A., S. Sarfaraz, and K. Ayub, *Organic transformations in the confined space of porous organic cage CC<sub>2</sub>; catalysis or inhibition*. RSC advances, 2022. **12**(37): p. 24397-24411.

## 2. The inner-sphere mechanism analysis.

The inner-sphere mechanism adopted for the activation of C-OH bond (free phenols) to biphenyl (Ar-Ar) is presented in Figure S3. As per the energy profile, the inner-sphere mechanism for the conversion of free phenols to biphenyl undergoes three transition states. As presented in Figure S3, the activation barrier for transition states (TS1) and (TS3) is 29.4 and 23.3 kcal/mol, respectively. These activation barriers are somehow achievable under mechanochemical conditions. However, TS2 is located for the simultaneous addition of aryl and removal of OH group and is observed at the barrier height of 58.1 kcal/mol. This step is thermodynamically not feasible to achieve under mechanochemical conditions. Therefore, outer sphere mechanism of Ru-catalyzed activation of phenols in a one-step under mechanochemical conditions to biphenyl (Ar-Ar) is considered as more plausible reaction mechanism.

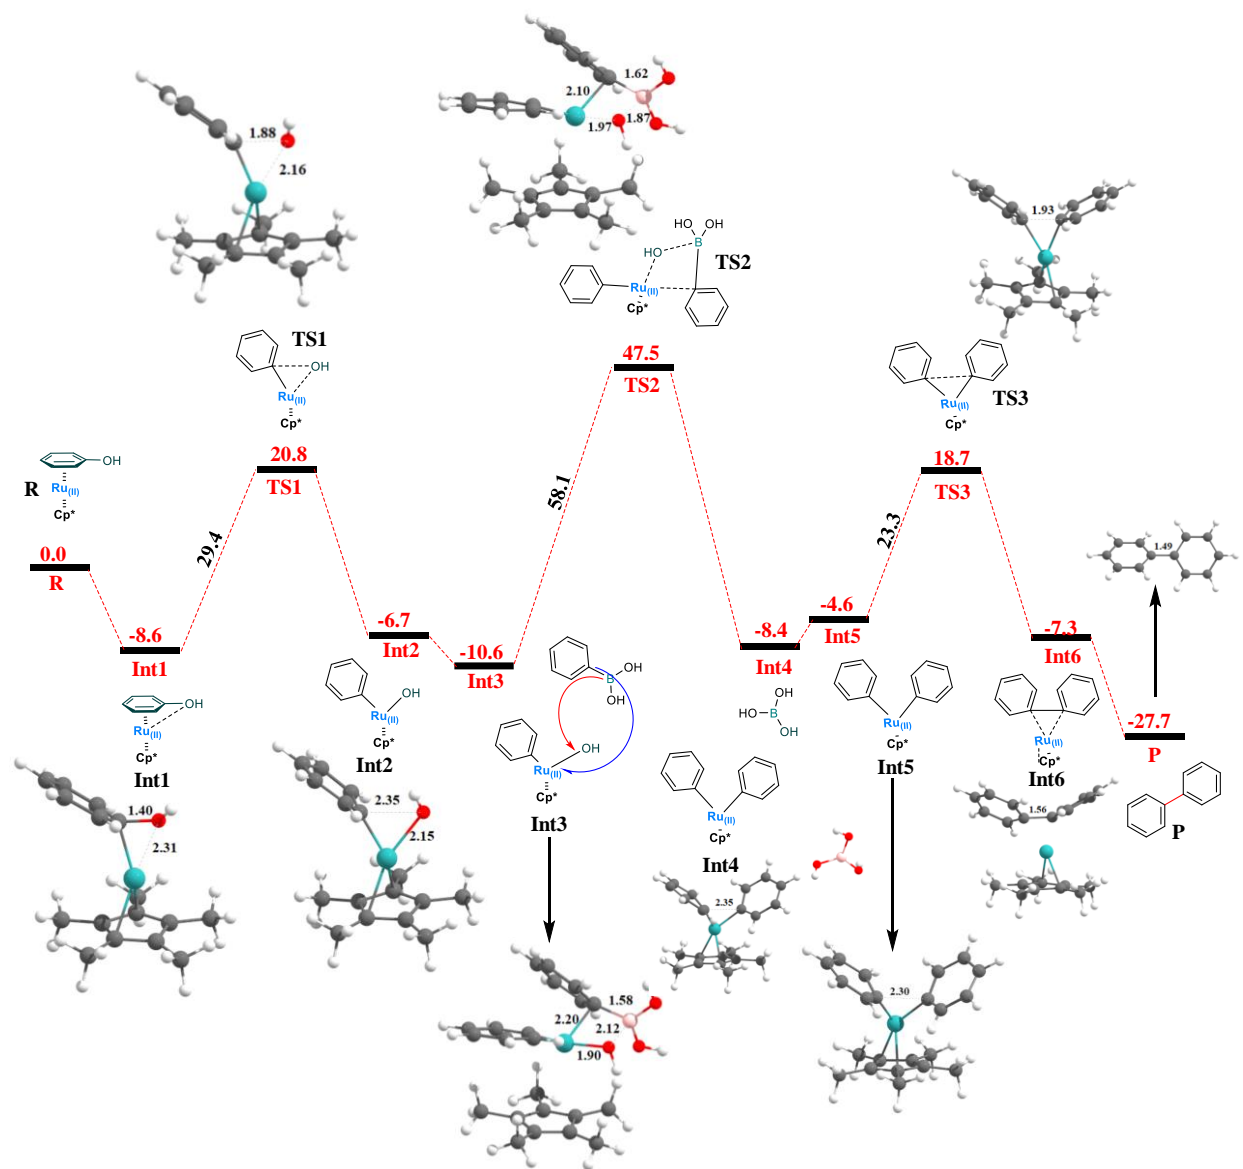

Figure S3. Energy profile for Ru-catalyzed formal activation of C—OH bond (free phenols) to biphenyl (Ar-Ar) through an inner-sphere mechanism. All the reported energy values are presented in kcal/mol with reference initial reactant (R) at 0.00 kcal/mol at B3LYP functional with Pople style basis set 6-31G(d,p) for lighter atoms (C, O, H, and B) and LanL2DZ for Ru.



## Cartesian coordinates of reactant, product, transition state, and intermediates

### CPX-0

|    |             |             |             |
|----|-------------|-------------|-------------|
| C  | 1.33124100  | -0.00013400 | 1.68262100  |
| C  | 1.80466200  | -1.15841300 | 0.96179400  |
| C  | 2.61520500  | -0.71632700 | -0.14287200 |
| C  | 1.80436000  | 1.15838700  | 0.96201600  |
| C  | 2.61500500  | 0.71672000  | -0.14275600 |
| Ru | 0.42784100  | -0.00004600 | -0.37457400 |
| C  | -0.67159700 | -0.71191200 | -2.07387000 |
| C  | -1.28950800 | -1.31361500 | -0.90233700 |
| C  | -2.53582600 | -0.71088100 | -0.38785100 |
| C  | -2.53579300 | 0.71084900  | -0.38786400 |
| C  | -1.28945700 | 1.31350700  | -0.90240600 |
| C  | -0.67158500 | 0.71171400  | -2.07391800 |
| H  | -3.64471500 | -2.48673600 | 0.10543600  |
| H  | -0.22596200 | -1.29282800 | -2.87925100 |
| H  | -1.20473400 | -2.39678200 | -0.80386200 |
| C  | -3.64426200 | -1.39703900 | 0.10745700  |
| C  | -3.64421100 | 1.39706900  | 0.10739400  |
| H  | -1.20462700 | 2.39667400  | -0.80398800 |
| H  | -0.22589800 | 1.29257100  | -2.87931300 |
| C  | -4.74064500 | 0.69548000  | 0.64522600  |
| C  | -4.74066200 | -0.69538600 | 0.64527100  |
| H  | -3.64462900 | 2.48676600  | 0.10531000  |
| H  | -5.58164800 | 1.24411900  | 1.06633600  |
| H  | -5.58167800 | -1.24397400 | 1.06642100  |
| C  | 1.61269300  | -2.58647000 | 1.39048700  |
| H  | 1.62327200  | -3.26690200 | 0.53268200  |
| H  | 2.40139800  | -2.92011500 | 2.08370200  |

|   |             |             |             |
|---|-------------|-------------|-------------|
| H | 0.65142900  | -2.71981500 | 1.89572200  |
| C | 0.62205900  | -0.00037400 | 3.00660300  |
| H | -0.02197700 | 0.87825000  | 3.11313400  |
| H | -0.02196900 | -0.87904100 | 3.11283000  |
| H | 1.32076100  | -0.00051700 | 3.86156600  |
| C | 1.61206200  | 2.58632200  | 1.39096700  |
| H | 2.40073200  | 2.92003800  | 2.08418600  |
| H | 1.62242000  | 3.26690200  | 0.53327700  |
| H | 0.65079500  | 2.71935000  | 1.89628300  |
| C | 3.39334000  | 1.59812600  | -1.07762500 |
| H | 3.48144700  | 1.14856300  | -2.07290800 |
| H | 2.90934000  | 2.57179700  | -1.20518900 |
| H | 4.41751300  | 1.79028100  | -0.71688100 |
| C | 3.39365200  | -1.59737400 | -1.07799300 |
| H | 3.48151900  | -1.14761600 | -2.07320800 |
| H | 4.41792100  | -1.78932900 | -0.71741400 |
| H | 2.90988200  | -2.57114500 | -1.20565900 |

**CPX-I**

|   |            |             |             |
|---|------------|-------------|-------------|
| C | 2.31970683 | -1.42495886 | -0.60338067 |
| C | 2.22089795 | -0.10014136 | -1.04831627 |
| C | 1.62070847 | 0.87723365  | -0.25296632 |
| C | 1.11122404 | 0.53421623  | 1.01249267  |
| C | 1.21741016 | -0.78214331 | 1.47054999  |
| C | 1.81956764 | -1.76039322 | 0.66384799  |
| H | 2.76732985 | -2.17623524 | -1.22421458 |
| H | 2.60780632 | 0.16199072  | -2.00991108 |
| H | 0.64392870 | 1.27778893  | 1.62526212  |
| H | 0.83343447 | -1.03920886 | 2.44313604  |
| H | 1.90559672 | -2.77163659 | 1.00765814  |

|    |             |             |             |
|----|-------------|-------------|-------------|
| C  | -2.58808347 | 0.77915990  | 0.66569399  |
| C  | -2.63111974 | 1.18650270  | -0.67588268 |
| C  | -2.35292167 | 0.06290392  | -1.48062529 |
| C  | -2.28293906 | -0.58844801 | 0.68815201  |
| C  | -2.14490321 | -1.02246124 | -0.63617758 |
| Ru | -0.19415400 | -0.21760300 | -0.05195700 |
| O  | 1.52279270  | 2.22716606  | -0.72095610 |
| H  | 0.71764214  | 2.62489983  | -0.37600192 |
| C  | -2.82831144 | 1.67843564  | 1.89584086  |
| H  | -1.89499998 | 2.10679619  | 2.21849821  |
| H  | -3.50161806 | 2.46280438  | 1.63064337  |
| H  | -3.24862607 | 1.09940303  | 2.69290293  |
| C  | -2.90906969 | 2.61709514  | -1.17869565 |
| H  | -2.39043462 | 2.77239596  | -2.09990701 |
| H  | -3.96380319 | 2.73408173  | -1.32694333 |
| H  | -2.56658648 | 3.33991802  | -0.45502670 |
| C  | -2.29657269 | 0.02348249  | -3.01200660 |
| H  | -3.00947655 | 0.74724817  | -3.39705047 |
| H  | -1.27522000 | 0.27284344  | -3.33837151 |
| H  | -2.56006776 | -0.98084753 | -3.36312704 |
| C  | -1.81217672 | -2.46218837 | -1.07196887 |
| H  | -2.71812576 | -2.99996999 | -1.22361098 |
| H  | -1.25127900 | -2.44765586 | -1.98086373 |
| H  | -1.23005810 | -2.93884294 | -0.30983466 |
| C  | -2.12548118 | -1.46879816 | 1.94546626  |
| H  | -3.07692872 | -1.90537075 | 2.20944147  |
| H  | -1.41973174 | -2.24932230 | 1.74763139  |
| H  | -1.77611380 | -0.86431954 | 2.76563750  |

**CPX-II**

|    |             |             |             |
|----|-------------|-------------|-------------|
| C  | 0.91647642  | 0.07254552  | -0.31808111 |
| O  | 0.76813608  | 1.41515522  | -0.78750054 |
| C  | -0.40569310 | -2.05966392 | -0.78018726 |
| C  | 0.19687948  | -0.89403823 | -1.27236671 |
| C  | 0.33646971  | -0.04881739 | 1.10024111  |
| C  | -0.27037074 | -1.24064606 | 1.51911644  |
| C  | -0.58086718 | -2.25563052 | 0.59944135  |
| H  | -0.74523835 | -2.80754158 | -1.46594306 |
| H  | 0.16340830  | -0.67983175 | -2.32015056 |
| H  | 0.40418925  | 0.77900031  | 1.77474025  |
| H  | -0.50860157 | -1.37582381 | 2.55343062  |
| H  | -0.97343703 | -3.18574731 | 0.95385017  |
| C  | -3.97803556 | 0.61328302  | 0.54763520  |
| C  | -3.39882135 | 1.61423080  | -0.24388866 |
| C  | -3.23909556 | 1.10402861  | -1.53918678 |
| C  | -4.17635937 | -0.51565929 | -0.25877216 |
| C  | -3.71961434 | -0.21223265 | -1.54846325 |
| Ru | -1.76259800 | -0.41681400 | 0.05664500  |
| C  | 5.13033666  | -0.97093498 | -0.19649612 |
| C  | 4.23714399  | -1.55589895 | 0.71125918  |
| C  | 2.87735197  | -1.21909300 | 0.67219110  |
| C  | 2.41079978  | -0.29722876 | -0.27458191 |
| C  | 3.30403941  | 0.28815676  | -1.18201145 |
| C  | 4.66377823  | -0.04886390 | -1.14307692 |
| H  | 6.16849253  | -1.22829966 | -0.16684339 |
| H  | 4.59339236  | -2.25968094 | 1.43412479  |
| H  | 2.19539340  | -1.66574860 | 1.36522237  |
| H  | 2.94784523  | 0.99235463  | -1.90466673 |
| H  | 5.34571732  | 0.39785672  | -1.83608176 |

|             |             |             |             |
|-------------|-------------|-------------|-------------|
| B           | 1.50430016  | 2.37591501  | 0.16468493  |
| O           | 1.63756332  | 2.02700673  | 1.65878335  |
| H           | 2.44805956  | 2.40722995  | 2.00531381  |
| O           | 2.10704703  | 3.68539803  | -0.37719639 |
| H           | 2.09864978  | 4.35176850  | 0.31379543  |
| C           | -3.00652363 | 3.02690218  | 0.22683986  |
| H           | -2.17162429 | 3.37440588  | -0.34516641 |
| H           | -3.83408887 | 3.69113155  | 0.08972436  |
| H           | -2.74120871 | 2.99670611  | 1.26298016  |
| C           | -4.33400091 | 0.73305345  | 2.04123056  |
| H           | -4.25681416 | -0.22842858 | 2.50457167  |
| H           | -3.65754023 | 1.41296106  | 2.51571021  |
| H           | -5.33490885 | 1.09781022  | 2.14119855  |
| C           | -4.78856456 | -1.85453870 | 0.19293164  |
| H           | -5.84885155 | -1.82764352 | 0.05147730  |
| H           | -4.37145904 | -2.65122060 | -0.38700943 |
| H           | -4.57079329 | -2.01506304 | 1.22817955  |
| C           | -3.74174701 | -1.15906522 | -2.76278397 |
| H           | -2.82849455 | -1.71540369 | -2.79785408 |
| H           | -4.56734634 | -1.83386398 | -2.67384779 |
| H           | -3.84485910 | -0.58577565 | -3.66035805 |
| C           | -2.64053130 | 1.85757909  | -2.74144806 |
| H           | -1.58346208 | 1.69508876  | -2.77376932 |
| H           | -3.08469125 | 1.49683060  | -3.64559519 |
| H           | -2.83755471 | 2.90442994  | -2.64032560 |
| <b>Int3</b> |             |             |             |
| N           | -1.15051500 | -1.21300700 | 0.83023300  |
| Zr          | -2.04077600 | -3.01724500 | 0.29239100  |
| N           | -3.40286800 | 0.31047700  | -0.00383800 |

|    |             |             |             |
|----|-------------|-------------|-------------|
| Zr | -4.26617400 | -1.32110100 | -0.93643400 |
| N  | -3.91104300 | -2.21252100 | 0.85635400  |
| Zr | -2.96871600 | -0.60787500 | 1.76128200  |
| N  | -2.34191400 | -2.08083700 | -1.46628100 |
| Zr | -1.45495000 | -0.26391300 | -0.95218300 |
| C  | 4.73335300  | -0.75824800 | 1.64239500  |
| C  | 3.43376500  | -1.36243100 | 1.50178900  |
| C  | 3.39192400  | -2.03578400 | 0.22737800  |
| C  | 5.49795300  | -1.05768400 | 0.45512600  |
| C  | 4.66919200  | -1.84544100 | -0.42108900 |
| Ru | 3.70234900  | 0.12437100  | -0.12858000 |
| C  | 6.94109000  | -0.71144700 | 0.22951300  |
| H  | 7.59152200  | -1.50310700 | 0.62560200  |
| H  | 7.16917600  | -0.60210500 | -0.83448600 |
| H  | 7.21519700  | 0.22073100  | 0.73103100  |
| C  | 5.24034300  | -0.03153800 | 2.85415100  |
| H  | 5.72042300  | -0.73290500 | 3.54914300  |
| H  | 5.98067800  | 0.72909200  | 2.58979500  |
| H  | 4.42943200  | 0.46241100  | 3.39482500  |
| C  | 5.09766500  | -2.46297900 | -1.72106800 |
| H  | 5.85553000  | -1.85787000 | -2.22711400 |
| H  | 5.52771600  | -3.45841400 | -1.54895100 |
| H  | 4.25320100  | -2.58488700 | -2.40443100 |
| C  | 2.24928200  | -2.85980200 | -0.28610300 |
| H  | 2.23071400  | -2.89090300 | -1.37994300 |
| H  | 2.32714300  | -3.89517700 | 0.07626400  |
| H  | 1.29051900  | -2.45975300 | 0.05756500  |
| C  | 2.33420800  | -1.36322200 | 2.52001300  |
| H  | 2.39964300  | -2.29510600 | 3.10070100  |

|   |             |             |             |
|---|-------------|-------------|-------------|
| H | 2.39470400  | -0.53112400 | 3.22599700  |
| H | 1.35202000  | -1.32088300 | 2.04373900  |
| C | 1.66203500  | 0.93821300  | -1.25905600 |
| O | 0.54447200  | 0.38723200  | -1.59040800 |
| C | 3.99150700  | 1.59311100  | -1.85104600 |
| C | 2.80319000  | 0.87205700  | -2.13122700 |
| C | 1.88590100  | 1.53966400  | 0.03474600  |
| C | 3.07374200  | 2.26550700  | 0.31514900  |
| C | 4.13241900  | 2.30796900  | -0.63056600 |
| H | 4.81124900  | 1.56671000  | -2.56129800 |
| H | 2.70209100  | 0.31447500  | -3.05633500 |
| H | 1.09724300  | 1.46801500  | 0.77650900  |
| H | 3.18993900  | 2.75277700  | 1.27805700  |
| H | 5.04916400  | 2.84242900  | -0.40954900 |
| C | -0.89429367 | 7.05195282  | 0.94544783  |
| C | -1.64121467 | 5.87436982  | 0.86866183  |
| C | -1.51879867 | 5.04061782  | -0.24281917 |
| C | -0.65674667 | 5.36032782  | -1.31128217 |
| C | 0.08578933  | 6.55270982  | -1.20420817 |
| C | -0.02532467 | 7.39102982  | -0.09545417 |
| H | -0.98775967 | 7.70233382  | 1.81150483  |
| H | -2.31712967 | 5.60266182  | 1.67581283  |
| H | -2.10315467 | 4.12218282  | -0.27245117 |
| H | 0.77616933  | 6.84438282  | -1.99649717 |
| H | 0.56103133  | 8.30496382  | -0.04145117 |
| B | -0.49648667 | 4.40921782  | -2.55412217 |
| O | -1.06477767 | 3.15632082  | -2.61686217 |
| H | -1.78177767 | 2.89267982  | -1.97517617 |
| O | 0.27782933  | 4.71549182  | -3.64221617 |

|           |             |             |             |
|-----------|-------------|-------------|-------------|
| H         | 0.68177133  | 5.58969882  | -3.59014517 |
| <b>TS</b> |             |             |             |
| N         | -1.72784600 | -0.73391000 | 0.54449300  |
| Zr        | -3.11017600 | -1.55537600 | -0.70485900 |
| N         | -3.35493900 | 1.62524700  | 0.84407500  |
| Zr        | -4.53657200 | 1.24005600  | -0.79522600 |
| N         | -4.71359700 | -0.64756300 | 0.09333300  |
| Zr        | -3.47742900 | -0.19801900 | 1.85057200  |
| N         | -2.97814100 | 0.28068500  | -1.66142500 |
| Zr        | -1.54040100 | 1.06945000  | -0.23315800 |
| C         | 2.72543700  | -3.29075800 | 1.00722500  |
| C         | 1.30597500  | -3.13646200 | 0.74882200  |
| C         | 1.12261000  | -3.09189000 | -0.68624300 |
| C         | 3.40748400  | -3.35730700 | -0.26754500 |
| C         | 2.42873200  | -3.21428500 | -1.29615900 |
| Ru        | 2.43572900  | -1.39916500 | 0.00332100  |
| C         | 4.86538800  | -3.63561400 | -0.44797400 |
| H         | 5.07070000  | -4.71295000 | -0.49537500 |
| H         | 5.24917700  | -3.17725700 | -1.37182400 |
| H         | 5.47376700  | -3.22221500 | 0.36815700  |
| C         | 3.35582300  | -3.44549500 | 2.36037000  |
| H         | 3.38078400  | -4.49940700 | 2.66762400  |
| H         | 4.37243800  | -3.05501200 | 2.37026600  |
| H         | 2.78993000  | -2.90175300 | 3.12693100  |
| C         | 2.69930900  | -3.30240200 | -2.78018300 |
| H         | 3.70735200  | -2.93551600 | -3.02976700 |
| H         | 2.62826300  | -4.34963700 | -3.12616000 |
| H         | 1.98412100  | -2.72367500 | -3.36202200 |
| C         | -0.12669900 | -2.99100200 | -1.53295200 |



|   |             |             |             |
|---|-------------|-------------|-------------|
| H | 0.03380100  | -2.14503400 | -2.33654500 |
| H | -0.34211400 | -4.00332600 | -2.06193200 |
| H | -1.07186800 | -2.64245400 | -0.90955100 |
| C | 0.24899800  | -3.12644900 | 1.80377800  |
| H | -0.09340600 | -4.15772100 | 2.01825600  |
| H | 0.63252100  | -2.72177500 | 2.75554900  |
| H | -0.60888800 | -2.51447900 | 1.53034800  |
| C | 1.72746400  | 1.41355000  | -0.02120700 |
| O | 0.41596200  | 1.78068000  | -0.14343200 |
| C | 3.57712300  | 0.12361900  | -1.11314800 |
| C | 2.25897400  | 0.64268200  | -1.16302200 |
| C | 2.05158300  | 0.66257100  | 1.18764400  |
| C | 3.34787900  | 0.10263300  | 1.35050600  |
| C | 4.16739400  | -0.06169400 | 0.17909100  |
| H | 4.10285400  | -0.18841700 | -2.01640200 |
| H | 1.68596800  | 0.60409900  | -2.10144800 |
| H | 1.31620900  | 0.57548500  | 2.00430400  |
| H | 3.71302600  | -0.25319100 | 2.31623500  |
| H | 5.20139100  | -0.39835800 | 0.26067500  |
| C | 5.66779800  | 3.78716800  | 0.10709100  |
| C | 4.94050400  | 3.64993800  | 1.28048000  |
| C | 3.56270900  | 3.40294500  | 1.25518300  |
| C | 2.78264800  | 3.26727200  | 0.03691200  |
| C | 3.61844300  | 3.40640700  | -1.14559700 |
| C | 4.97704800  | 3.65944300  | -1.12525400 |
| H | 6.73657500  | 3.98550700  | 0.13598900  |
| H | 5.43393600  | 3.75307100  | 2.24309200  |
| H | 3.04389200  | 3.31154400  | 2.20596100  |
| H | 3.15013400  | 3.26147500  | -2.12136400 |

|   |            |            |             |
|---|------------|------------|-------------|
| H | 5.52682900 | 3.74036600 | -2.05451300 |
| B | 1.47890600 | 4.18849900 | 0.02259900  |
| O | 0.81851500 | 4.57168400 | 1.17411300  |
| H | 0.86743900 | 3.88045200 | 1.88533100  |
| O | 0.96951300 | 4.72296200 | -1.15052200 |
| H | 1.38070700 | 4.32849500 | -1.95556100 |

#### Int4

|    |             |             |             |
|----|-------------|-------------|-------------|
| N  | -2.10225700 | -1.13952100 | 0.89997100  |
| Zr | -2.94766200 | -1.98370500 | -0.77763200 |
| N  | -3.52396100 | 1.22261400  | 0.76550500  |
| Zr | -4.21791500 | 0.80385300  | -1.13507800 |
| N  | -4.69972100 | -1.01422100 | -0.22523400 |
| Zr | -3.93970300 | -0.53849300 | 1.61899500  |
| N  | -2.48499000 | -0.26234100 | -1.67607900 |
| Zr | -1.52451200 | 0.67026200  | 0.04494300  |
| C  | 3.46686100  | -2.94745800 | 0.95507000  |
| C  | 2.04433600  | -2.84438200 | 0.77791400  |
| C  | 1.78586400  | -2.68346600 | -0.62456600 |
| C  | 4.08908400  | -2.87904200 | -0.33683900 |
| C  | 3.05518800  | -2.69473500 | -1.31665200 |
| Ru | 3.04612500  | -0.89262300 | 0.01308800  |
| C  | 5.55240800  | -3.06471100 | -0.63140800 |
| H  | 5.79750700  | -4.12498100 | -0.78246900 |
| H  | 5.84532400  | -2.52822200 | -1.53967000 |
| H  | 6.18052000  | -2.69765200 | 0.18667200  |
| C  | 4.16913000  | -3.24319000 | 2.25118100  |
| H  | 4.21302600  | -4.32664000 | 2.43120700  |
| H  | 5.19304600  | -2.86933900 | 2.25123400  |
| H  | 3.65090800  | -2.79342200 | 3.10211700  |

|   |             |             |             |
|---|-------------|-------------|-------------|
| C | 3.22344000  | -2.69186700 | -2.81181700 |
| H | 4.19384900  | -2.28861800 | -3.11117200 |
| H | 3.14649200  | -3.70685400 | -3.22460800 |
| H | 2.45212300  | -2.08173200 | -3.29033900 |
| C | 0.42748700  | -2.76597400 | -1.26886000 |
| H | 0.33452000  | -2.08440900 | -2.13257600 |
| H | 0.23045100  | -3.79899300 | -1.61820600 |
| H | -0.33302800 | -2.48453100 | -0.51900100 |
| C | 1.02147000  | -3.09373100 | 1.84312500  |
| H | 0.93553700  | -4.17729900 | 2.02321300  |
| H | 1.29899200  | -2.63735200 | 2.80180700  |
| H | 0.03483800  | -2.73971600 | 1.54952200  |
| C | 1.74525800  | 1.61382000  | 0.10463900  |
| O | 0.36122900  | 1.32720100  | 0.02765000  |
| C | 3.87482600  | 0.84659500  | -1.07234700 |
| C | 2.45841700  | 0.97316700  | -1.08132400 |
| C | 2.35211300  | 0.82937200  | 1.25569400  |
| C | 3.77182600  | 0.70615200  | 1.36637300  |
| C | 4.55795800  | 0.73089800  | 0.17944200  |
| H | 4.42930300  | 0.72749700  | -1.99881600 |
| H | 1.97099700  | 1.06300800  | -2.04981600 |
| H | 1.76536500  | 0.74144400  | 2.17074600  |
| H | 4.24230500  | 0.46540900  | 2.31580800  |
| H | 5.62358300  | 0.53316900  | 0.21021700  |
| C | 2.87090800  | 5.39285600  | -1.48762900 |
| C | 3.61094600  | 4.88515000  | -0.39478700 |
| C | 3.14069600  | 3.84902900  | 0.37456400  |
| C | 1.79449300  | 3.21833900  | 0.18369000  |
| C | 1.11022800  | 3.77734400  | -1.02757000 |

|   |             |            |             |
|---|-------------|------------|-------------|
| C | 1.62016800  | 4.79933400 | -1.78892300 |
| H | 3.26004200  | 6.20428100 | -2.08966200 |
| H | 4.58343400  | 5.31843700 | -0.16788400 |
| H | 3.76076100  | 3.48226900 | 1.19223400  |
| H | 0.16015900  | 3.32236300 | -1.30330300 |
| H | 1.06057600  | 5.15261800 | -2.65047200 |
| B | 0.88508000  | 3.46467900 | 1.50304900  |
| O | 1.19795200  | 2.88099800 | 2.70760700  |
| H | 2.08158200  | 2.48413100 | 2.70854500  |
| O | -0.28347800 | 4.18383600 | 1.47917300  |
| H | -0.36323100 | 4.65748600 | 0.63601500  |

**CPX-III**

|   |             |             |             |
|---|-------------|-------------|-------------|
| C | -1.95973200 | -0.00646800 | 0.55874300  |
| O | -1.84292900 | 1.39431500  | 0.97017600  |
| C | -0.70706500 | -1.80061600 | 1.78870500  |
| C | -1.62664300 | -0.79935100 | 1.80278700  |
| C | -0.98563200 | -0.36330100 | -0.57421100 |
| C | -0.44321700 | -1.69693600 | -0.66643900 |
| C | -0.06199300 | -2.29115900 | 0.58379500  |
| H | -0.43971600 | -2.27738600 | 2.73267900  |
| H | -2.09374600 | -0.46456200 | 2.72462700  |
| H | -1.23787000 | 0.12295100  | -1.51279200 |
| H | -0.31258700 | -2.21263200 | -1.61719900 |
| H | 0.40583600  | -3.27234000 | 0.60974300  |
| C | 2.77748300  | 0.00657300  | -1.48327300 |
| C | 2.46231400  | 1.20710700  | -0.74899300 |
| C | 2.81229500  | 1.00604400  | 0.62542000  |
| C | 3.28410500  | -0.95481300 | -0.54954500 |
| C | 3.28655900  | -0.34509900 | 0.76206400  |

|    |             |             |             |
|----|-------------|-------------|-------------|
| Ru | 1.12438700  | -0.50189300 | 0.05999200  |
| C  | -6.07301600 | -0.78224000 | -0.68651900 |
| C  | -5.14982300 | -1.82394800 | -0.53833500 |
| C  | -3.84519800 | -1.55642900 | -0.13152900 |
| C  | -3.41970300 | -0.24271500 | 0.13527100  |
| C  | -4.35427700 | 0.79055400  | -0.01341200 |
| C  | -5.66537100 | 0.52430400  | -0.42043200 |
| H  | -7.09314600 | -0.98977900 | -1.00174600 |
| H  | -5.45102600 | -2.85018400 | -0.73897100 |
| H  | -3.13313600 | -2.36727700 | -0.01340200 |
| H  | -4.04891800 | 1.80779900  | 0.20001900  |
| H  | -6.37081300 | 1.34643000  | -0.52615700 |
| B  | -1.26303700 | 2.39370100  | 0.26926400  |
| O  | -1.40692000 | 2.53748200  | -1.10514900 |
| H  | -0.67803700 | 3.02466500  | -1.50242700 |
| O  | -0.64703200 | 3.39291600  | 1.02342800  |
| H  | -0.45428100 | 4.16839400  | 0.48683000  |
| C  | 2.02841000  | 2.50904500  | -1.36185600 |
| H  | 1.49793800  | 3.12647500  | -0.62994700 |
| H  | 2.88211800  | 3.10164400  | -1.72880900 |
| H  | 1.36454500  | 2.34226000  | -2.21830400 |
| C  | 2.68204600  | -0.16260200 | -2.97264000 |
| H  | 2.52391100  | -1.21141400 | -3.24604800 |
| H  | 1.84281600  | 0.40616000  | -3.38765000 |
| H  | 3.59239800  | 0.17442100  | -3.49588000 |
| C  | 3.83299200  | -2.31203100 | -0.88735200 |
| H  | 4.91224000  | -2.28547400 | -1.11115100 |
| H  | 3.69194300  | -3.01545000 | -0.06011100 |
| H  | 3.33183400  | -2.73959900 | -1.76258900 |

|   |            |             |            |
|---|------------|-------------|------------|
| C | 3.87737200 | -0.95017400 | 2.00558000 |
| H | 3.39743200 | -0.55805400 | 2.90790200 |
| H | 3.74697900 | -2.03702500 | 2.01938000 |
| H | 4.95823100 | -0.75000100 | 2.09673000 |
| C | 2.74721700 | 2.04146400  | 1.71359500 |
| H | 1.85886500 | 2.67304500  | 1.61767500 |
| H | 2.69561700 | 1.57155900  | 2.70081600 |
| H | 3.63305100 | 2.69918800  | 1.71463100 |

**CPX-IV**

|    |             |             |             |
|----|-------------|-------------|-------------|
| C  | 1.31386400  | -1.35444000 | -0.40998800 |
| C  | -0.71141000 | -1.98496400 | -1.62417700 |
| C  | 0.53784500  | -1.30572900 | -1.65990500 |
| C  | 1.27349300  | -2.67009400 | 0.29321000  |
| C  | 0.07527800  | -3.27677800 | 0.34537800  |
| C  | -1.03761700 | -2.55680800 | -0.32139000 |
| H  | -1.36465500 | -2.03143100 | -2.49485300 |
| H  | 0.90521300  | -0.84226600 | -2.57417100 |
| H  | 2.19306300  | -3.16501900 | 0.60802100  |
| H  | -0.05422600 | -4.29049600 | 0.73024400  |
| H  | -2.04124800 | -2.96645300 | -0.20118500 |
| C  | -1.63363900 | 0.66741800  | 1.57135400  |
| C  | -0.63818000 | 1.53910800  | 1.00741100  |
| C  | -1.05484800 | 1.93103600  | -0.31237800 |
| C  | -2.64457200 | 0.47146300  | 0.55374300  |
| C  | -2.29414600 | 1.26968500  | -0.59503700 |
| Ru | -0.74986100 | -0.37633300 | -0.21666200 |
| C  | 4.78348800  | 1.18306300  | 0.12976400  |
| C  | 4.50354000  | 0.14277300  | 1.02010500  |
| C  | 3.38412000  | -0.66827700 | 0.84545700  |

|   |             |             |             |
|---|-------------|-------------|-------------|
| C | 2.47994300  | -0.48204800 | -0.22962600 |
| C | 2.77649600  | 0.59299100  | -1.10701900 |
| C | 3.89881500  | 1.39806500  | -0.93345700 |
| H | 5.65782700  | 1.81499000  | 0.26510800  |
| H | 5.16525800  | -0.04049900 | 1.86548500  |
| H | 3.18632000  | -1.45738400 | 1.56401600  |
| H | 2.09685200  | 0.80443700  | -1.92565000 |
| H | 4.08476000  | 2.20788000  | -1.63749300 |
| C | -1.68936800 | 0.17068800  | 2.98787200  |
| H | -2.20485200 | -0.79306100 | 3.05057200  |
| H | -0.68497400 | 0.02193300  | 3.39668900  |
| H | -2.21708500 | 0.86867600  | 3.66023700  |
| C | -3.92779600 | -0.28916500 | 0.73635100  |
| H | -4.72421100 | 0.33682900  | 1.16966300  |
| H | -4.30093900 | -0.67817000 | -0.21697900 |
| H | -3.78583500 | -1.14712500 | 1.40097100  |
| C | -3.12918700 | 1.45527100  | -1.82956100 |
| H | -3.74048200 | 0.57058600  | -2.03471400 |
| H | -3.81635400 | 2.31291400  | -1.74285800 |
| H | -2.50474000 | 1.62895400  | -2.71268100 |
| C | -0.35905200 | 2.92598500  | -1.19694100 |
| H | -0.52569600 | 2.70608700  | -2.25751600 |
| H | -0.71071800 | 3.95633900  | -1.02187700 |
| H | 0.72189800  | 2.91901300  | -1.02980300 |
| C | 0.58193700  | 2.05169100  | 1.71902600  |
| H | 1.42925300  | 2.16144200  | 1.03614500  |
| H | 0.39760700  | 3.03145100  | 2.18640900  |
| H | 0.89781900  | 1.36343100  | 2.50821100  |

**Product**

|   |             |             |             |
|---|-------------|-------------|-------------|
| C | -0.74285200 | -0.00018200 | -0.00008600 |
| C | -2.85923600 | 1.13933000  | -0.39385800 |
| C | -1.46541600 | 1.13859400  | -0.39453200 |
| C | -1.46558500 | -1.13868900 | 0.39464100  |
| C | -2.85945800 | -1.13916800 | 0.39387000  |
| C | -3.56302500 | 0.00001500  | -0.00022200 |
| H | -3.39642400 | 2.02886800  | -0.71043800 |
| H | -0.92803600 | 2.02106200  | -0.72873400 |
| H | -0.92848400 | -2.02118300 | 0.72919500  |
| H | -3.39666300 | -2.02846600 | 0.71109200  |
| H | -4.64901900 | 0.00026700  | -0.00004700 |
| C | 3.56302900  | 0.00008600  | 0.00000000  |
| C | 2.85948700  | -1.13917100 | -0.39388900 |
| C | 1.46556600  | -1.13870400 | -0.39457400 |
| C | 0.74286500  | -0.00011900 | -0.00010700 |
| C | 1.46542100  | 1.13860000  | 0.39459000  |
| C | 2.85920800  | 1.13930600  | 0.39393700  |
| H | 4.64902200  | 0.00035100  | 0.00010200  |
| H | 3.39665600  | -2.02865800 | -0.71063100 |
| H | 0.92850400  | -2.02132100 | -0.72882200 |
| H | 0.92797100  | 2.02096100  | 0.72894700  |
| H | 3.39645200  | 2.02873800  | 0.71072400  |
